# Supplementary material for: Comprehensive Metabolomic Analysis in Blood, Urine, Fat, and Muscle in Men with Metabolic Syndrome: A Randomized, Placebo-Controlled Clinical Trial on the Effects of Resveratrol after Four Months’ Treatment
Source: Int J Mol Sci. 2017 Mar 4;18(3):554. doi: 10.3390/ijms18030554 (PMC5372570; doi:10.3390/ijms18030554)
Supplement: Supplementary file 1 [file ijms-18-00554-s001.zip › Supplementary Tables.xlsx]

## Sheet: Cover
Comprehensive metabolomic analysis in blood, urine, fat and muscle in men with metabolic syndrome: A Randomized, placebo-controlled clinical trial on the effects of resveratrol after four months' treatment
Table of contents
Supplementary Table S1: Plasma metabolites identification data
Supplementary Table S2: Adipose tissue metabolites identification data
Supplementary Table S3: Muscle tissue metabolites identification data
Supplementary Table S4: Urine metabolites identification data
Supplementary Table S5: Metabolite Names to Venn Diagram Figure 1 (All detected metabolites in the four different matrices)
Supplementary Table S6: Metabolite Names to Venn Diagram Figure 2 (Significantly hRSV-altered metabolites detected in the four different matrices)
Supplementary Table S7: Random Forest Classification Plots in Plasma, Adipose Tissue, Muscle Tissue, Urine

## Sheet: Supplementary_table_S1
Supplementary Table S1: Plasma metabolites identification data
PATHWAY_SORTORDER	BIOCHEMICAL	SUPER_PATHWAY	SUB_PATHWAY	COMP_ID	PLATFORM	CHEMICAL_ID	RI	MASS	CAS	PUBCHEM	KEGG	Group HMDB_ID
1466	1,2-dipalmitoylglycerol	Lipid	Diacylglycerol	11953	GC/MS	850	2600	145	40290-32-2;	99931		HMDB07098
3009	1,2-propanediol	Xenobiotics	Chemical	38002	GC/MS	100001176	1041	117	57-55-6;	1030	C00583	HMDB01881
2415	1,3,7-trimethylurate	Xenobiotics	Xanthine Metabolism	34404	LC/MS Neg	100001397	1988	209.1	5415-44-1;	79437	C16361	HMDB02123
1467	1,3-dipalmitoylglycerol	Lipid	Diacylglycerol	35728	GC/MS	1730	2637	371.3	26657-95-4_x000D_ ;	68149		HMDB31011
735	1,5-anhydroglucitol (1,5-AG)	Carbohydrate	Glycolysis, Gluconeogenesis, and Pyruvate Metabolism	20675	GC/MS	100000580	1788.7	217.1	154-58-5;	64960	C07326	HMDB02712
2513	1,6-anhydroglucose	Xenobiotics	Food Component/Plant	21049	GC/MS	100000939	1679.5	204.1	498-07-7;	2724705		HMDB00640
2413	1,7-dimethylurate	Xenobiotics	Xanthine Metabolism	34400	LC/MS Neg	100001399	1607	195.1	33868-03-0;	91611	C16356	HMDB11103
955	10-heptadecenoate (17:1n7)	Lipid	Long Chain Fatty Acid	33971	LC/MS Neg	100001278	5558	267.3	29743-97-3;	5312435
965	10-nonadecenoate (19:1n9)	Lipid	Long Chain Fatty Acid	33972	LC/MS Neg	100001277	5775	295.4	73033-09-7;	5312513		HMDB13622
944	10-undecenoate (11:1n1)	Lipid	Medium Chain Fatty Acid	32497	LC/MS Neg	100001197	5086	183.3	1333-28-4;
1204	13-HODE + 9-HODE	Lipid	Fatty Acid, Monohydroxy	37752	LC/MS Neg	100002196	5270	295.2
1039	13-methylmyristic acid	Lipid	Fatty Acid, Branched	38293	LC/MS Neg	100002344	5498	241.3	2485-71-4;	151014
1042	15-methylpalmitate (isobar with 2-methylpalmitate)	Lipid	Fatty Acid, Branched	38768	LC/MS Neg	100002945	5698	269.4
1045	17-methylstearate	Lipid	Fatty Acid, Branched	38296	LC/MS Neg	100002356	5987	297.4	2724-59-6;	3083779
1366	1-arachidonoylglycerophosphocholine (20:4n6)*	Lipid	Lysolipid	33228	LC/MS Pos	100001551	5554	544.3			C05208
1395	1-arachidonoylglycerophosphoethanolamine*	Lipid	Lysolipid	35186	LC/MS Neg	100001571	5731	500.3		42607465		HMDB11517
1416	1-arachidonoylglycerophosphoinositol*	Lipid	Lysolipid	34214	LC/MS Neg	100001654	5479	619.4
1360	1-dihomo-linoleoylglycerophosphocholine (20:2n6)*	Lipid	Lysolipid	33871	LC/MS Pos	100001553	5696	548.3
1373	1-docosahexaenoylglycerophosphocholine (22:6n3)*	Lipid	Lysolipid	33822	LC/MS Pos	100001566	5518	568.4
1402	1-docosahexaenoylglycerophosphoethanolamine*	Lipid	Lysolipid	44633	LC/MS Neg	100002060	5650	524.3
1370	1-docosapentaenoylglycerophosphocholine (22:5n3)*	Lipid	Lysolipid	37231	LC/MS Pos	100002063	5584	570.4
1368	1-eicosapentaenoylglycerophosphocholine (20:5n3)*	Lipid	Lysolipid	44563	LC/MS Pos	100005351	5519.6	542.4
1400	1-eicosapentaenoylglycerophosphoethanolamine*	Lipid	Lysolipid	44626	LC/MS Neg	100004552	5560.7	498.4
1364	1-eicosatrienoylglycerophosphocholine (20:3)*	Lipid	Lysolipid	33821	LC/MS Pos	100001552	5600	546.4
1399	1-eicosatrienoylglycerophosphoethanolamine*	Lipid	Lysolipid	44630	LC/MS Neg	100005371	5777	502.3
1363	1-eicosenoylglycerophosphocholine (20:1n9)*	Lipid	Lysolipid	44560	LC/MS Pos	100005352	5882.7	550.5
2787	1-hydroxy-2-naphthalenecarboxylate	Xenobiotics	Drug	38140	LC/MS Neg	100002394	3929	187.1	86-48-6;	6844	C03203
1357	1-linolenoylglycerophosphocholine (18:3n3)*	Lipid	Lysolipid	44562	LC/MS Pos	100005350	5527.9	518.4
1453	1-linoleoylglycerol (1-monolinolein)	Lipid	Monoacylglycerol	27447	LC/MS Neg	100001040	6226	279.2	2277-28-3;	5283469
1355	1-linoleoylglycerophosphocholine (18:2n6)	Lipid	Lysolipid	34419	LC/MS Pos	100001395	5574	520.4		11988421	C04100
1391	1-linoleoylglycerophosphoethanolamine*	Lipid	Lysolipid	32635	LC/MS Neg	100001570	5725	476.3		52925130		HMDB11507
1348	1-margaroylglycerophosphocholine (17:0)	Lipid	Lysolipid	33957	LC/MS Pos	100001264	5750	510.4	50930-23-9;	24779463	C04230	HMDB12108
2410	1-methylurate	Xenobiotics	Xanthine Metabolism	34395	LC/MS Pos	100001400	1827	183.1	708-79-2;	69726	C16359	HMDB03099
2416	1-methylxanthine	Xenobiotics	Xanthine Metabolism	34389	LC/MS Neg	100001405	1600	165.1	6136-37-4;	80220	C16358	HMDB10738
1339	1-myristoylglycerophosphocholine (14:0)	Lipid	Lysolipid	45453	LC/MS Pos	100001383	5481	468.3	20559-16-4;	460604	C04230	HMDB10379
1451	1-oleoylglycerol (1-monoolein)	Lipid	Monoacylglycerol	21184	LC/MS Pos	100000924	5821	374.1	111-03-5;	5283468		HMDB11567
1352	1-oleoylglycerophosphocholine (18:1)	Lipid	Lysolipid	33960	LC/MS Pos	100001272	5700	522.4	19420-56-5;	16081932
1387	1-oleoylglycerophosphoethanolamine	Lipid	Lysolipid	35628	LC/MS Neg	100001569	5928	478.3	89576-29-4;	9547071		HMDB11506
1410	1-oleoylglycerophosphoinositol*	Lipid	Lysolipid	36602	LC/MS Neg	100001777	5577	597.4
1379	1-oleoylplasmenylethanolamine*	Lipid	Lysolipid	44621	LC/MS Neg	100005372	6105.2	462.5
1346	1-palmitoleoylglycerophosphocholine (16:1)*	Lipid	Lysolipid	33230	LC/MS Pos	100001511	5524	494.3		24779461
1389	1-palmitoleoylglycerophosphoethanolamine*	Lipid	Lysolipid	34565	LC/MS Neg	100001784	5661	450.4
1446	1-palmitoylglycerol (1-monopalmitin)	Lipid	Monoacylglycerol	21127	GC/MS	100000827	2119.5	371.3	542-44-9;	14900		HMDB31074
1344	1-palmitoylglycerophosphocholine (16:0)	Lipid	Lysolipid	33955	LC/MS Pos	100001263	5671	496.4	17364-16-8;	86554
1382	1-palmitoylglycerophosphoethanolamine	Lipid	Lysolipid	35631	LC/MS Neg	100001567	5940	452.3		9547069		HMDB11503
1429	1-palmitoylglycerophosphoglycerol*	Lipid	Lysolipid	45970	LC/MS Neg	100005717	5549.7	483.4		3300276
1405	1-palmitoylglycerophosphoinositol*	Lipid	Lysolipid	35305	LC/MS Neg	100001655	5573	571.3
1377	1-palmitoylplasmenylethanolamine*	Lipid	Lysolipid	39270	LC/MS Neg	100003000	6153	436.4
1343	1-pentadecanoylglycerophosphocholine (15:0)*	Lipid	Lysolipid	37418	LC/MS Pos	100002173	5563	482.3
1449	1-stearoylglycerol (1-monostearin)	Lipid	Monoacylglycerol	21188	GC/MS	100000932	2186.6	399.4	123-94-4;31566-31-1;	24699	D01947	HMDB31075
1350	1-stearoylglycerophosphocholine (18:0)	Lipid	Lysolipid	33961	LC/MS Pos	100001271	5844	524.4	19420-57-6;	497299
1385	1-stearoylglycerophosphoethanolamine	Lipid	Lysolipid	34416	LC/MS Neg	100001461	6200	480.4	69747-55-3;	9547068		HMDB11130
1432	1-stearoylglycerophosphoglycerol	Lipid	Lysolipid	34437	LC/MS Neg	100001462	5826	511.4
1408	1-stearoylglycerophosphoinositol	Lipid	Lysolipid	19324	LC/MS Neg	100000656	5800	599.4	796963-93-4;
2516	2,3-dihydroxyisovalerate	Xenobiotics	Food Component/Plant	38276	GC/MS	100002417	1422	131	1756-18-9;	677	C04039	HMDB12141
1553	21-hydroxypregnenolone disulfate	Lipid	Steroid	37173	LC/MS Neg	100001999	3931	245.3	1164-98-3;	134595	C05485	HMDB04026
283	2-aminobutyrate	Amino Acid	Methionine, Cysteine, SAM and Taurine Metabolism	32348	LC/MS Pos	1128	758	104.1	1492-24-6;	439691	C02261	HMDB00650
1107	2-aminoheptanoate	Lipid	Fatty Acid, Amino	43761	LC/MS Pos	100004542	2524.2	146.2	1115-90-8;	227939
1112	2-aminooctanoate	Lipid	Fatty Acid, Amino	43343	LC/MS Pos	100004227	3384	160.1	644-90-6;	69522		HMDB00991
3036	2-aminophenol sulfate	Xenobiotics	Chemical	43266	LC/MS Neg	100004322	1670.8	188		181670
1367	2-arachidonoylglycerophosphocholine*	Lipid	Lysolipid	35256	LC/MS Pos	100001554	5524	544.3
1396	2-arachidonoylglycerophosphoethanolamine*	Lipid	Lysolipid	32815	LC/MS Neg	100001674	5674	500.3
1374	2-docosahexaenoylglycerophosphocholine*	Lipid	Lysolipid	35883	LC/MS Neg	100001565	5800	641.9
1398	2-docosahexaenoylglycerophosphoethanolamine*	Lipid	Lysolipid	34258	LC/MS Neg	100002061	5600	524.3
3053	2-ethylhexanoate	Xenobiotics	Chemical	1554	GC/MS	1121	1210.5	201.2	123-66-0;149-57-5;	8697		HMDB31230
255	2-hydroxy-3-methylvalerate	Amino Acid	Leucine, Isoleucine and Valine Metabolism	36746	LC/MS Neg	100001541	1787	131.1	488-15-3;	164623		HMDB00317
2770	2-hydroxyacetaminophen sulfate*	Xenobiotics	Drug	33173	LC/MS Neg	100001791	1703	246.1
284	2-hydroxybutyrate (AHB)	Amino Acid	Methionine, Cysteine, SAM and Taurine Metabolism	21044	GC/MS	100000933	1169.4	131	3347-90-8;	440864	C05984	HMDB00008
1178	2-hydroxydecanoate	Lipid	Fatty Acid, Monohydroxy	42489	LC/MS Neg	100004089	4826	187.2	5393-81-7;	21488
1054	2-hydroxyglutarate	Lipid	Fatty Acid, Dicarboxylate	37253	GC/MS	100002070	1576	247	40951-21-1;	43	C02630	HMDB00606
2353	2-hydroxyhippurate (salicylurate)	Xenobiotics	Benzoate Metabolism	18281	LC/MS Neg	1869	2252	194.1	487-54-7;	10253	C07588	HMDB00840
2781	2-hydroxyibuprofen	Xenobiotics	Drug	43330	LC/MS Pos	100004169	4470.7	240.1	51146-55-5;
3057	2-hydroxyisobutyrate	Xenobiotics	Chemical	22030	GC/MS	100000748	1107.5	130.9	594-61-6;	11671		HMDB00729
1177	2-hydroxyoctanoate	Lipid	Fatty Acid, Monohydroxy	22036	LC/MS Neg	100000743	3781	159.2	617-73-2;	94180		HMDB02264
1180	2-hydroxypalmitate	Lipid	Fatty Acid, Monohydroxy	35675	LC/MS Neg	100001579	5508	271.3	764-67-0;	92836		HMDB31057
1181	2-hydroxystearate	Lipid	Fatty Acid, Monohydroxy	17945	LC/MS Neg	1239	5705	299.4	629-22-1;	69417	C03045
1356	2-linoleoylglycerophosphocholine*	Lipid	Lysolipid	35257	LC/MS Pos	100001557	5544	520.4
1392	2-linoleoylglycerophosphoethanolamine*	Lipid	Lysolipid	36593	LC/MS Neg	100001776	5650	476.4
2777	2-methoxyacetaminophen glucuronide*	Xenobiotics	Drug	33161	LC/MS Pos	100001795	2069	375
2771	2-methoxyacetaminophen sulfate*	Xenobiotics	Drug	33178	LC/MS Neg	100001793	1977	260.1
250	2-methylbutyrylcarnitine (C5)	Amino Acid	Leucine, Isoleucine and Valine Metabolism	35431	LC/MS Pos	100001509	2439	246.1	31023-25-3;	6426901		HMDB00378
1340	2-myristoylglycerophosphocholine*	Lipid	Lysolipid	35626	LC/MS Pos	100001563	5450	468.3
1354	2-oleoylglycerophosphocholine*	Lipid	Lysolipid	35254	LC/MS Pos	100001556	5640	522.4
1388	2-oleoylglycerophosphoethanolamine*	Lipid	Lysolipid	35687	LC/MS Neg	100001651	5848	478.3
1347	2-palmitoleoylglycerophosphocholine*	Lipid	Lysolipid	35819	LC/MS Pos	100001561	5482	494.3
1345	2-palmitoylglycerophosphocholine*	Lipid	Lysolipid	35253	LC/MS Pos	100001562	5604	496.3		15061532
1383	2-palmitoylglycerophosphoethanolamine*	Lipid	Lysolipid	35688	LC/MS Neg	100001652	5790	452.3
2430	2-piperidinone	Xenobiotics	Food Component/Plant	43400	LC/MS Pos	100004295	2034	100.1	675-20-7;	12665
1351	2-stearoylglycerophosphocholine*	Lipid	Lysolipid	35255	LC/MS Pos	100001555	5780	524.4		10208382
1409	2-stearoylglycerophosphoinositol*	Lipid	Lysolipid	39223	LC/MS Neg	100003008	5725	599.4
164	3-(3-hydroxyphenyl)propionate	Amino Acid	Phenylalanine and Tyrosine Metabolism	35635	LC/MS Neg	100001624	2000	165.1	621-54-5;	91	C11457	HMDB00375
116	3-(4-hydroxyphenyl)lactate	Amino Acid	Phenylalanine and Tyrosine Metabolism	32197	LC/MS Neg	240	1395	181.1	6482-98-0;	9378	C03672	HMDB00755
2772	3-(cystein-S-yl)acetaminophen*	Xenobiotics	Drug	34365	LC/MS Pos	100001797	1960	271.2		5233914
2773	3-(N-acetyl-L-cystein-S-yl) acetaminophen*	Xenobiotics	Drug	18299	LC/MS Pos	2048	2622	313.1	52372-86-8;	83967
2414	3,7-dimethylurate	Xenobiotics	Xanthine Metabolism	34399	LC/MS Neg	100001398	1432	195.1	13087-49-5;	83126	C16360	HMDB01982
160	3-[3-(sulfooxy)phenyl]propanoic acid	Amino Acid	Phenylalanine and Tyrosine Metabolism	45415	LC/MS Neg	100005391	1291.9	245.1	86321-32-6;	187488
1076	3-carboxy-4-methyl-5-propyl-2-furanpropanoate (CMPF)	Lipid	Fatty Acid, Dicarboxylate	31787	LC/MS Neg	100001178	2815	239.1	86879-39-2;	123979		HMDB61112
1169	3-dehydrocarnitine*	Lipid	Carnitine Metabolism	32654	LC/MS Pos	100001508	1020	160.2	10457-99-5;	6991982	C02636	HMDB12154
2392	3-ethylphenylsulfate*	Xenobiotics	Benzoate Metabolism	36848	LC/MS Neg	100001808	3490	201			C14386
256	3-hydroxy-2-ethylpropionate	Amino Acid	Leucine, Isoleucine and Valine Metabolism	32397	GC/MS	100001170	1269	247.1	4374-62-3;	188979		HMDB00396
1173	3-hydroxybutyrate (BHBA)	Lipid	Ketone Bodies	542	GC/MS	254	1203.5	116.9	625-72-9;	441	C01089	HMDB00357
1185	3-hydroxydecanoate	Lipid	Fatty Acid, Monohydroxy	22053	LC/MS Neg	100000997	4681	187.2	5561-87-5;	26612		HMDB02203
2354	3-hydroxyhippurate	Xenobiotics	Benzoate Metabolism	39600	LC/MS Neg	100002122	1670	194.1	1637-75-8;	450268		HMDB06116
264	3-hydroxyisobutyrate	Amino Acid	Leucine, Isoleucine and Valine Metabolism	1549	GC/MS	111	1205	177.11	2068-83-9;	87	C06001	HMDB00336
1182	3-hydroxypropanoate	Lipid	Fatty Acid, Monohydroxy	42103	GC/MS	115	1187.1	177.1	503-66-2;	68152	C01013	HMDB00700
2793	3-hydroxyquinine	Xenobiotics	Drug	43496	LC/MS Pos	100002410	2390	341.3	78549-61-8;	441264	C07344	HMDB01091
185	3-indoxyl sulfate	Amino Acid	Tryptophan Metabolism	27672	LC/MS Neg	100000467	2258	212	2642-37-7;	10258		HMDB00682
135	3-methoxytyrosine	Amino Acid	Phenylalanine and Tyrosine Metabolism	12017	LC/MS Pos	1342	1765	212.1	300-48-1;	1670		HMDB01434
2381	3-methyl catechol sulfate 1	Xenobiotics	Benzoate Metabolism	42494	LC/MS Neg	100004112	2779.2	203
261	3-methyl-2-oxobutyrate	Amino Acid	Leucine, Isoleucine and Valine Metabolism	21047	LC/MS Neg	100000936	1489	115.1	3715-29-5;	49	C00141	HMDB00019
249	3-methyl-2-oxovalerate	Amino Acid	Leucine, Isoleucine and Valine Metabolism	15676	LC/MS Neg	100000036	2106	129.2	51829-07-3;	47	C00671	HMDB03736
231	3-methylglutarylcarnitine (C6)	Amino Acid	Leucine, Isoleucine and Valine Metabolism	37060	LC/MS Pos	100001742	1900	290.1	102673-95-0;	128145		HMDB00552
53	3-methylhistidine	Amino Acid	Histidine Metabolism	15677	LC/MS Neg	100000042	911	168.1	368-16-1;	64969	C01152	HMDB00479
2417	3-methylxanthine	Xenobiotics	Xanthine Metabolism	32445	LC/MS Neg	100001108	1717	165.1	1076-22-8 ;	70639	C16357	HMDB01886
167	3-phenylpropionate (hydrocinnamate)	Amino Acid	Phenylalanine and Tyrosine Metabolism	15749	LC/MS Neg	100000010	2830	149.1	501-52-0;	107	C05629	HMDB00764
2775	4-acetamidophenol	Xenobiotics	Drug	12032	LC/MS Pos	1383	2238	152.1	103-90-2;	1983	C06804	HMDB01859
2774	4-acetaminophen sulfate	Xenobiotics	Drug	37475	LC/MS Neg	2049	1779	230.1	10066-90-7;32113-41-0;	83939	C06804	HMDB59911
1607	4-androsten-3beta,17beta-diol disulfate 1*	Lipid	Steroid	37202	LC/MS Neg	100001992	3735	224.3		10634	C04295	HMDB03818
1608	4-androsten-3beta,17beta-diol disulfate 2*	Lipid	Steroid	37203	LC/MS Neg	100001994	4073	224.3		10634	C04295	HMDB03818
2393	4-ethylphenylsulfate	Xenobiotics	Benzoate Metabolism	36099	LC/MS Neg	100001756	3570	201.1	123-07-9;		C13637
2355	4-hydroxyhippurate	Xenobiotics	Benzoate Metabolism	35527	LC/MS Neg	100001423	1439	194	2482-25-9;	151012		HMDB13678
102	4-hydroxyphenylacetate	Amino Acid	Phenylalanine and Tyrosine Metabolism	541	GC/MS	144	1630.6	179	156-38-7;	127	C00642	HMDB00020
115	4-hydroxyphenylpyruvate	Amino Acid	Phenylalanine and Tyrosine Metabolism	1669	LC/MS Neg	1141	1716	179.1	156-39-8;	979	C01179	HMDB00707
220	4-methyl-2-oxopentanoate	Amino Acid	Leucine, Isoleucine and Valine Metabolism	22116	LC/MS Neg	100000551	2200	129.2	816-66-0;	70	C00233	HMDB00695
2383	4-methylcatechol sulfate	Xenobiotics	Benzoate Metabolism	42493	LC/MS Neg	100004111	2666.4	203
2394	4-vinylphenol sulfate	Xenobiotics	Benzoate Metabolism	36098	LC/MS Neg	100001755	3323	199.1	2628-17-3;	6426766	C05627	HMDB04072
2419	5-acetylamino-6-amino-3-methyluracil	Xenobiotics	Xanthine Metabolism	34424	LC/MS Neg	100001403	1025	197.1	19893-78-8;	88299	C16366	HMDB04400
2420	5-acetylamino-6-formylamino-3-methyluracil	Xenobiotics	Xanthine Metabolism	34401	LC/MS Neg	100001402	930	225.1	85438-96-6;	108214	C16365	HMDB11105
1620	5alpha-androstan-3alpha,17beta-diol disulfate	Lipid	Steroid	37184	LC/MS Neg	100002017	4240	225.3
1619	5alpha-androstan-3beta,17alpha-diol disulfate	Lipid	Steroid	37187	LC/MS Neg	100002021	4207	225.3
1621	5alpha-androstan-3beta,17beta-diol disulfate	Lipid	Steroid	37190	LC/MS Neg	100001987	3872	225.2	571-20-0;	242332	C12525	HMDB00493
1571	5alpha-pregnan-3alpha,20beta-diol disulfate 1*	Lipid	Steroid	37201	LC/MS Neg	100002016	4287	239.3
1569	5alpha-pregnan-3beta,20alpha-diol disulfate	Lipid	Steroid	37198	LC/MS Neg	100001988	3962	239.3
946	5-dodecenoate (12:1n7)	Lipid	Medium Chain Fatty Acid	33968	LC/MS Neg	100001232	5206	197.2	2430-94-6;	5312378		HMDB00529
2204	5-methyluridine (ribothymidine)	Nucleotide	Pyrimidine Metabolism, Uracil containing	35136	LC/MS Neg	100001446	1774	257.1	1463-10-1;	445408		HMDB00884
360	5-oxoproline	Amino Acid	Glutathione Metabolism	1494	LC/MS Neg	1021	744	128.2	98-79-3;	7405	C01879	HMDB00267
1512	7-alpha-hydroxy-3-oxo-4-cholestenoate (7-Hoca)	Lipid	Sterol	36776	LC/MS Neg	100001609	5268	429.4	115538-85-7;	3081085	C17337	HMDB12458
2172	7-methylguanine	Nucleotide	Purine Metabolism, Guanine containing	35114	LC/MS Pos	100001456	1353	166.1	578-76-7;	11361	C02242	HMDB00897
2418	7-methylxanthine	Xenobiotics	Xanthine Metabolism	34390	LC/MS Pos	100001396	1778	167.1	552-62-5;	68374	C16353	HMDB01991
1151	acetylcarnitine	Lipid	Fatty Acid Metabolism(Acyl Carnitine)	32198	LC/MS Pos	100000802	1203	204.2	5080-50-2;	1	C02571	HMDB00201
934	acetylphosphate	Energy	Oxidative Phosphorylation	15488	GC/MS	1211	1263	211	94249-01-1;	186	C00227	HMDB01494
337	acisoga	Amino Acid	Polyamine Metabolism	43258	LC/MS Pos	100004541	2317.9	185.3	106692-36-8;	129397
2131	adenosine 5'-monophosphate (AMP)	Nucleotide	Purine Metabolism, Adenine containing	32342	LC/MS Pos	209	1210	348.1	149022-20-8;	6083	C00020	HMDB00045
995	adrenate (22:4n6)	Lipid	Polyunsaturated Fatty Acid (n3 and n6)	32980	LC/MS Neg	100001193	5684	331.3	2091-25-0;	5497181	C16527	HMDB02226
723	ADSGEGDFXAEGGGVR*	Peptide	Fibrinogen Cleavage Peptide	33084	LC/MS Pos	100001322	3239	769		16133137
24	alanine	Amino Acid	Alanine and Aspartate Metabolism	32339	GC/MS	811	1487.9	232.1	56-41-7;	5950	C00041	HMDB00161
2126	allantoin	Nucleotide	Purine Metabolism, (Hypo)Xanthine/Inosine containing	1107	GC/MS	1002	1809.8	518.3	97-59-6;	204	C02350	HMDB00462
265	alpha-hydroxyisocaproate	Amino Acid	Leucine, Isoleucine and Valine Metabolism	22132	LC/MS Neg	100000706	1854	131.2	10303-64-7;	83697	C03264	HMDB00746
236	alpha-hydroxyisovalerate	Amino Acid	Leucine, Isoleucine and Valine Metabolism	33937	GC/MS	100001300	1208	145.1	600-37-3;	99823		HMDB00407
281	alpha-ketobutyrate	Amino Acid	Methionine, Cysteine, SAM and Taurine Metabolism	42107	GC/MS	796	1220	231.1	600-18-0;	58	C00109	HMDB00005
920	alpha-ketoglutarate	Energy	TCA Cycle	33453	GC/MS	93	1779	419.1	305-72-6;328-50-7;22202-68-2;	51	C00026	HMDB00208
2290	alpha-tocopherol	Cofactors and Vitamins	Tocopherol Metabolism	1561	GC/MS	1105	2305.4	502.5	59-02-9;10191-41-0;	14985	C02477	HMDB01893
1627	andro steroid monosulfate 2*	Lipid	Steroid	32792	LC/MS Neg	100002068	4240	383.2			C04555	HMDB02759
1597	androsterone sulfate	Lipid	Steroid	31591	LC/MS Neg	100001073	5011	369.2	2479-86-9 ;	159663		HMDB02759
780	arabinose	Carbohydrate	Pentose Metabolism	575	GC/MS	828	1631.6	217	28697-53-2;	66308	C00216	HMDB00646
785	arabitol	Carbohydrate	Pentose Metabolism	38075	GC/MS	100000012	1687.5	307.1	7643-75-6;	94154	C01904	HMDB01851
967	arachidate (20:0)	Lipid	Long Chain Fatty Acid	44679	LC/MS Neg	893	6282	311.3	506-30-9;	10467	C06425	HMDB02212
994	arachidonate (20:4n6)	Lipid	Polyunsaturated Fatty Acid (n3 and n6)	1110	LC/MS Neg	229	5525	303.4	506-32-1;	444899	C00219	HMDB01043
301	arginine	Amino Acid	Urea cycle; Arginine and Proline Metabolism	1638	LC/MS Pos	231	650	175.2	1119-34-2;	232	C00062	HMDB00517
29	asparagine	Amino Acid	Alanine and Aspartate Metabolism	34283	GC/MS	917	1854	232.2	70-47-3;	6267	C00152	HMDB00168
2361	benzoate	Xenobiotics	Benzoate Metabolism	15778	GC/MS	100000008	1291.5	179	65-85-0;	243	C00180	HMDB01870
2218	beta-alanine	Nucleotide	Pyrimidine Metabolism, Uracil containing	35838	GC/MS	244	1582.3	334.1	56-41-7;107-95-9;	239	C00099	HMDB00056
228	beta-hydroxyisovalerate	Amino Acid	Leucine, Isoleucine and Valine Metabolism	12129	LC/MS Neg	1442	1043	117.1	625-08-1;	69362		HMDB00754
6	betaine	Amino Acid	Glycine, Serine and Threonine Metabolism	3141	LC/MS Pos	799	721	118.2	107-43-7;	247	C00719	HMDB00043
2322	bilirubin (E,E)*	Cofactors and Vitamins	Hemoglobin and Porphyrin Metabolism	32586	LC/MS Pos	100001950	4625	585.2	114-25-0 ;	5315454
2321	bilirubin (Z,Z)	Cofactors and Vitamins	Hemoglobin and Porphyrin Metabolism	27716	LC/MS Neg	1090	4812	583.2	635-65-4;	5280352	C00486	HMDB00054
2324	biliverdin	Cofactors and Vitamins	Hemoglobin and Porphyrin Metabolism	2137	LC/MS Neg	250	4671	581.2	55482-27-4;55482-27-4 ;	5353439	C00500	HMDB01008
3038	bisphenol A monosulfate	Xenobiotics	Chemical	37172	LC/MS Neg	100001997	4214	307
691	bradykinin	Peptide	Polypeptide	22154	LC/MS Pos	100000967	2990	531	58-82-2;	439201	C00306	HMDB04246
693	bradykinin, des-arg(9)	Peptide	Polypeptide	34420	LC/MS Neg	100001292	4150	902.5	15958-92-6;	105044	C00306	HMDB04246
1134	butyrylcarnitine	Lipid	Fatty Acid Metabolism (also BCAA Metabolism)	32412	LC/MS Pos	100001054	2007	232.2	25576-40-3;	439829	C02862	HDMB02013
2406	caffeine	Xenobiotics	Xanthine Metabolism	569	LC/MS Pos	849	2820	195.1	58-08-2;	2519	C07481	HMDB01847
1525	campesterol	Lipid	Sterol	39511	GC/MS	100001269	2353	343.4	474-62-4;	173183	C01789	HMDB02869
942	caprate (10:0)	Lipid	Medium Chain Fatty Acid	1642	LC/MS Neg	888	5092	171.2	112-37-8;	2969	C01571	HMDB00511
938	caproate (6:0)	Lipid	Medium Chain Fatty Acid	32489	LC/MS Neg	926	2766	115.2	142-62-1;	8892	C01585	HMDB00535
940	caprylate (8:0)	Lipid	Medium Chain Fatty Acid	32492	LC/MS Neg	932	4367	143.2	124-07-2;	379	C06423	HMDB00482
2783	carboxyibuprofen	Xenobiotics	Drug	43333	LC/MS Pos	100004171	4475.4	254.1	15935-54-3;	10444113
1168	carnitine	Lipid	Carnitine Metabolism	15500	LC/MS Pos	100000007	702	162.2	461-05-2;	10917	C00318	HMDB00062
2378	catechol sulfate	Xenobiotics	Benzoate Metabolism	35320	LC/MS Neg	100001605	1928	188.9	120-80-9;	3083879	C00090
214	C-glycosyltryptophan*	Amino Acid	Tryptophan Metabolism	32675	LC/MS Pos	100001949	1912	367.1
1648	cholate	Lipid	Primary Bile Acid Metabolism	22842	LC/MS Neg	136	5148	407.4	81-25-4;	221493	C00695	HMDB00619
1502	cholesterol	Lipid	Sterol	63	GC/MS	266	2316.9	329.3	57-88-5;	11025495	C00187	HMDB00067
1328	choline	Lipid	Phospholipid Metabolism	15506	LC/MS Pos	1256	674	104.2	67-48-1;	305	C00114	HMDB00097
2584	cinnamoylglycine	Xenobiotics	Food Component/Plant	38637	LC/MS Neg	100002253	3139	204.1	16534-24-0 ;	709625
1159	cis-4-decenoyl carnitine	Lipid	Fatty Acid Metabolism(Acyl Carnitine)	38178	LC/MS Pos	100002259	4404	314.3	98930-66-6;
960	cis-vaccenate (18:1n7)	Lipid	Long Chain Fatty Acid	33970	GC/MS	100001228	1987	339.3	506-17-2;	5282761	C08367	HMDB03231
915	citrate	Energy	TCA Cycle	1564	GC/MS	1124	1763.4	273.1	77-92-9;	311	C00158	HMDB00094
305	citrulline	Amino Acid	Urea cycle; Arginine and Proline Metabolism	2132	LC/MS Pos	391	715	176.1	372-75-8;	9750	C00327	HMDB00904
1582	cortisol	Lipid	Steroid	1712	LC/MS Pos	356	4573	363.2	50-23-7;	5754	C00735	HMDB00063
1586	cortisone	Lipid	Steroid	1769	LC/MS Pos	273	4420	361.2	53-06-5;	222786	C00762	HMDB02802
2421	cotinine	Xenobiotics	Tobacco Metabolite	553	LC/MS Pos	848	1493	177.1	486-56-6;	854019		HMDB01046
328	creatine	Amino Acid	Creatine Metabolism	27718	LC/MS Pos	1221	758	132.1	57-00-1;	586	C00300	HMDB00064
329	creatinine	Amino Acid	Creatine Metabolism	513	LC/MS Pos	275	730	114.1	60-27-5;	588	C00791	HMDB00562
455	cyclo(leu-pro)	Peptide	Dipeptide	37104	LC/MS Pos	100001925	3445	211.1	2873-36-1 ;	7074739
285	cysteine	Amino Acid	Methionine, Cysteine, SAM and Taurine Metabolism	31453	GC/MS	800	1560.1	218	52-90-4;56-89-3;	5862	C00097	HMDB00574
1157	decanoylcarnitine	Lipid	Fatty Acid Metabolism(Acyl Carnitine)	33941	LC/MS Pos	100001251	4700	316.3	1492-27-9 ;	10245190		HMDB00651
1591	dehydroisoandrosterone sulfate (DHEA-S)	Lipid	Steroid	32425	LC/MS Neg	100000792	4771	367.2	651-48-9;	12594	C04555	HMDB01032
1167	deoxycarnitine	Lipid	Carnitine Metabolism	36747	LC/MS Pos	100001662	759	146.1	6249-56-5;	134	C01181	HMDB01161
1659	deoxycholate	Lipid	Secondary Bile Acid Metabolism	1114	LC/MS Neg	302	5268	391.4	83-44-3;	222528	C04483	HMDB00626
2847	desvenlafaxine	Xenobiotics	Drug	43334	LC/MS Pos	100004173	3120	264.2	300827-87-6;
998	dihomo-linoleate (20:2n6)	Lipid	Polyunsaturated Fatty Acid (n3 and n6)	17805	LC/MS Neg	1231	5722	307.3	2091-39-6;	6439848	C16525	HMDB05060
993	dihomo-linolenate (20:3n3 or n6)	Lipid	Polyunsaturated Fatty Acid (n3 and n6)	35718	LC/MS Neg	100001739	5600	305.4	17046-59-2 ;	5280581	C03242	HMDB02925
312	dimethylarginine (SDMA + ADMA)	Amino Acid	Urea cycle; Arginine and Proline Metabolism	36808	LC/MS Pos	100001810	812	203.2	102783-24-4;	123831	C03626	HMDB01539
5	dimethylglycine	Amino Acid	Glycine, Serine and Threonine Metabolism	5086	GC/MS	806	1030	57.9	1118-68-9;	673	C01026	HMDB00092
997	docosadienoate (22:2n6)	Lipid	Polyunsaturated Fatty Acid (n3 and n6)	32415	LC/MS Neg	100001182	6017	335.4	7370-49-2 ;	5282807	C16533
985	docosahexaenoate (DHA; 22:6n3)	Lipid	Polyunsaturated Fatty Acid (n3 and n6)	19323	LC/MS Neg	100000665	5518	327.3	6217-54-5;	445580	C06429	HMDB02183
984	docosapentaenoate (n3 DPA; 22:5n3)	Lipid	Polyunsaturated Fatty Acid (n3 and n6)	32504	LC/MS Neg	100001181	5574	329.4	2234-74-4 ;	6441454	C16513	HMDB01976
996	docosapentaenoate (n6 DPA; 22:5n6)	Lipid	Polyunsaturated Fatty Acid (n3 and n6)	37478	LC/MS Neg	100001580	5625	329.4	25182-74-5;	6441454	C16513	HMDB13123
1070	dodecanedioate	Lipid	Fatty Acid, Dicarboxylate	32388	LC/MS Neg	100001102	2990	229.2	693-23-2 ;	12736	C02678	HMDB00623
724	DSGEGDFXAEGGGVR*	Peptide	Fibrinogen Cleavage Peptide	31548	LC/MS Pos	100001323	3379	733.5
3082	EDTA	Xenobiotics	Chemical	32511	LC/MS Neg	100001002	611	291.1	60-00-4;	6049	C00284	HMDB15109
983	eicosapentaenoate (EPA; 20:5n3)	Lipid	Polyunsaturated Fatty Acid (n3 and n6)	18467	LC/MS Neg	2050	5442	301.3	10-2005-9;10417-94-4;	446284	C06428	HMDB01999
970	eicosenoate (20:1n9 or 11)	Lipid	Long Chain Fatty Acid	33587	LC/MS Neg	100001335	5955	309.4		5282768
1594	epiandrosterone sulfate	Lipid	Steroid	33973	LC/MS Neg	100001287	4838	369.3	22229-22-7;		C07635	HMDB00365
974	erucate (22:1n9)	Lipid	Long Chain Fatty Acid	1552	LC/MS Neg	1087	6273.3	337.4	112-86-7;	5281116	C08316	HMDB02068
2612	erythritol	Xenobiotics	Food Component/Plant	20699	GC/MS	100000846	1517.5	217	149-32-6;	222285	C00503	HMDB02994
909	erythronate*	Carbohydrate	Aminosugar Metabolism	33477	GC/MS	100001320	1546.9	292.1	88759-55-1;	2781043		HMDB00613
1629	estrone 3-sulfate	Lipid	Steroid	18474	LC/MS Neg	1230	4441	349.2	438-67-5;	3001028	C02538	HMDB01425
3024	ethyl glucuronide	Xenobiotics	Chemical	39603	LC/MS Neg	100002849	804	221.1	17685-04-0;	152226
839	fructose	Carbohydrate	Fructose, Mannose and Galactose Metabolism	577	GC/MS	878	1758	217	57-48-7;	5984	C00095	HMDB00660
2298	gamma-CEHC	Cofactors and Vitamins	Tocopherol Metabolism	37462	LC/MS Neg	100002094	3818	263.3	178167-75-4;	133098		HMDB01931
366	gamma-glutamylalanine	Peptide	Gamma-glutamyl Amino Acid	37063	LC/MS Pos	100001843	1108	219	5875-41-2;	440103
369	gamma-glutamylglutamine	Peptide	Gamma-glutamyl Amino Acid	2730	LC/MS Pos	1140	806	276.1	10148-81-9;	150914	C05283	HMDB11738
372	gamma-glutamylisoleucine*	Peptide	Gamma-glutamyl Amino Acid	34456	LC/MS Pos	100001485	2644	261.2		14253342		HMDB11170
373	gamma-glutamylleucine	Peptide	Gamma-glutamyl Amino Acid	18369	LC/MS Pos	1268	2744	261.2	2566-39-4;	151023		HMDB11171
375	gamma-glutamylmethionine	Peptide	Gamma-glutamyl Amino Acid	37539	LC/MS Pos	100001313	1993	279.2	17663-87-5;	7009567
376	gamma-glutamylphenylalanine	Peptide	Gamma-glutamyl Amino Acid	33422	LC/MS Pos	100000491	2846	295.1	7432-24-8;	111299		HMDB00594
379	gamma-glutamyltyrosine	Peptide	Gamma-glutamyl Amino Acid	2734	LC/MS Pos	1102	2073	311.2	7432-23-7;	94340		HMDB11741
380	gamma-glutamylvaline	Peptide	Gamma-glutamyl Amino Acid	32393	LC/MS Pos	100001126	2040	247.2	2746-34-1;	7015683		HMDB11172
2295	gamma-tocopherol	Cofactors and Vitamins	Tocopherol Metabolism	33420	GC/MS	100001308	2264	488.4	54-28-4;	14986	C02483	HMDB01492
2544	gluconate	Xenobiotics	Food Component/Plant	587	GC/MS	338	1879.4	333	527-07-1;	10690	C00257	HMDB00625
738	glucose	Carbohydrate	Glycolysis, Gluconeogenesis, and Pyruvate Metabolism	20488	GC/MS	572	1866.8	217.1	50-99-7;	79025	C00031	HMDB00122
36	glutamate	Amino Acid	Glutamate Metabolism	32322	GC/MS	561	1836.8	362.2	56-86-0;	611	C00025	HMDB00148
37	glutamine	Amino Acid	Glutamate Metabolism	53	LC/MS Pos	563	684	147.2	56-85-9;	5961	C00064	HMDB00641
79	glutarylcarnitine (C5)	Amino Acid	Lysine Metabolism	35439	LC/MS Pos	100001593	1565	276.1	102636-82-8;	71464488		HMDB13130
758	glycerate	Carbohydrate	Glycolysis, Gluconeogenesis, and Pyruvate Metabolism	1572	GC/MS	1052	1360.7	189	600-19-1;	752	C00258	HMDB00139
1436	glycerol	Lipid	Glycerolipid Metabolism	15122	GC/MS	1254	1311	205	56-81-5;	753	C00116	HMDB00131
3085	glycerol 2-phosphate	Xenobiotics	Chemical	27728	GC/MS	100001029	1691.8	243	819-83-0;	2526	C02979	HMDB02520
1437	glycerol 3-phosphate (G3P)	Lipid	Glycerolipid Metabolism	15365	GC/MS	100000258	1719.7	357.1	29849-82-9;	754	C00093	HMDB00126
1331	glycerophosphorylcholine (GPC)	Lipid	Phospholipid Metabolism	15990	LC/MS Pos	100000269	694	258.1	28319-77-9;	71920	C00670	HMDB00086
1	glycine	Amino Acid	Glycine, Serine and Threonine Metabolism	32338	GC/MS	340	1486.9	218.1	56-40-6;	750	C00037	HMDB00123
1652	glycochenodeoxycholate	Lipid	Primary Bile Acid Metabolism	32346	LC/MS Neg	1628	5245	448.4	16564-43-5;	12544	C05466	HMDB00637
1649	glycocholate	Lipid	Primary Bile Acid Metabolism	18476	LC/MS Neg	342	5104	464.4	475-31-0;863-57-0;	10140	C01921	HMDB00138
1688	glycocholenate sulfate*	Lipid	Secondary Bile Acid Metabolism	32599	LC/MS Neg	100001989	4763	254.8
1660	glycodeoxycholate	Lipid	Secondary Bile Acid Metabolism	18477	LC/MS Neg	100000436	5265	448.4	360-65-6;	3035026	C05464	HMDB00631
3086	glycolate (hydroxyacetate)	Xenobiotics	Chemical	15737	GC/MS	203	1119	177	79-14-1;	757	C00160	HMDB00115
1666	glycolithocholate sulfate*	Lipid	Secondary Bile Acid Metabolism	32620	LC/MS Neg	100001657	5015	512.3	15324-64-8;	72222	C11301	HMDB02639
1671	glycoursodeoxycholate	Lipid	Secondary Bile Acid Metabolism	39379	LC/MS Neg	100002911	5018.1	448.4	64480-66-6;	12310288		HMDB00708
2320	heme	Cofactors and Vitamins	Hemoglobin and Porphyrin Metabolism	41754	LC/MS Pos	100001386	5057	616.2	14875-96-8;	26945	C00032	HMDB03178
3089	HEPES	Xenobiotics	Chemical	21248	LC/MS Neg	100000843	1033	237.2	7365-45-9;	23831
939	heptanoate (7:0)	Lipid	Medium Chain Fatty Acid	1644	LC/MS Neg	925	3695	129.2	111-14-8;	8094	C17714	HMDB00666
1072	hexadecanedioate	Lipid	Fatty Acid, Dicarboxylate	35678	LC/MS Neg	100001614	4650	285.2	505-54-4;	10459	C19615	HMDB00672
1154	hexanoylcarnitine	Lipid	Fatty Acid Metabolism(Acyl Carnitine)	32328	LC/MS Pos	100000781	3174	260.2	6920-35-0;	6426853		HMDB00705
2349	hippurate	Xenobiotics	Benzoate Metabolism	15753	LC/MS Neg	100000014	2136	178.1	495-69-2;	464	C01586	HMDB00714
50	histidine	Amino Acid	Histidine Metabolism	59	LC/MS Neg	355	757	154.1	5934-29-2;	6274	C00135	HMDB00177
697	HWESASXX*	Peptide	Polypeptide	32836	LC/MS Pos	100001327	3520	471.8
2872	hydrochlorothiazide	Xenobiotics	Drug	39625	LC/MS Neg	100002734	2041.6	296.1	58-93-5;	3639	C07041	HMDB01928
1152	hydroxybutyrylcarnitine*	Lipid	Fatty Acid Metabolism(Acyl Carnitine)	43264	LC/MS Pos	100003926	1475	248.2		53481617		HMDB13127
2117	hypoxanthine	Nucleotide	Purine Metabolism, (Hypo)Xanthine/Inosine containing	3127	LC/MS Neg	171	1313	135.1	68-94-0;	790	C00262	HMDB00157
2780	ibuprofen	Xenobiotics	Drug	17799	LC/MS Neg	1487	4951	205.1	15687-27-1_x000D_ ;	3672	D00126	HMDB01925
2779	ibuprofen acyl glucuronide	Xenobiotics	Drug	38326	LC/MS Neg	100002406	4969	381.2	115075-59-7;	163959
3090	iminodiacetate (IDA)	Xenobiotics	Chemical	35837	GC/MS	100000900	1706.1	232.2	142-73-4;	8897	C19911	HMDB11753
181	indoleacetate	Amino Acid	Tryptophan Metabolism	27513	LC/MS Pos	100001034	3760	176.1	6505-45-9;	802	C00954	HMDB00197
209	indoleacetylglutamine	Amino Acid	Tryptophan Metabolism	42087	LC/MS Neg	100001731	2530	302.2
180	indolelactate	Amino Acid	Tryptophan Metabolism	18349	GC/MS	100000463	1964.9	202	832-97-3;	92904	C02043	HMDB00671
183	indolepropionate	Amino Acid	Tryptophan Metabolism	32405	LC/MS Neg	100001083	2795	188.2	830-96-6 ;	3744		HMDB02302
262	isobutyrylcarnitine	Amino Acid	Leucine, Isoleucine and Valine Metabolism	33441	LC/MS Pos	100001055	1941	232.2	25518-49-4;	168379		HMDB00736
246	isoleucine	Amino Acid	Leucine, Isoleucine and Valine Metabolism	1125	LC/MS Pos	376	1614	132.1	73-32-5;	6306	C00407	HMDB00172
223	isovalerate	Amino Acid	Leucine, Isoleucine and Valine Metabolism	34732	LC/MS Neg	100000708	1623	101.2	503-74-2;	10430	C08262	HMDB00718
225	isovalerylcarnitine	Amino Acid	Leucine, Isoleucine and Valine Metabolism	34407	LC/MS Pos	100001393	2533	246.2	31023-24-2;	6426851		HMDB00688
2325	I-urobilinogen	Cofactors and Vitamins	Hemoglobin and Porphyrin Metabolism	32426	LC/MS Neg	100001226	4181	591.3	14684-37-8 ;	26818	C05790	HMDB04157
187	kynurenate	Amino Acid	Tryptophan Metabolism	1417	LC/MS Neg	98	2243	188.1	492-27-3;	3845	C01717	HMDB00715
186	kynurenine	Amino Acid	Tryptophan Metabolism	15140	LC/MS Pos	100000265	1902	209.1	2922-83-0;	161166	C00328	HMDB00684
755	lactate	Carbohydrate	Glycolysis, Gluconeogenesis, and Pyruvate Metabolism	527	GC/MS	482	1102.8	116.9	79-33-4;	612	C00186	HMDB00190
1500	lathosterol	Lipid	Sterol	39864	GC/MS	100001105	2337	255.2	80-99-9 ;	65728	C01189	HMDB01170
945	laurate (12:0)	Lipid	Medium Chain Fatty Acid	1645	LC/MS Neg	181	5288	199.3	143-07-7;	3893	C02679	HMDB00638
1160	laurylcarnitine	Lipid	Fatty Acid Metabolism(Acyl Carnitine)	34534	LC/MS Pos	100001392	5066	344.3	25518-54-1;	10427569		HMDB02250
217	leucine	Amino Acid	Leucine, Isoleucine and Valine Metabolism	60	LC/MS Pos	397	1674	132.2	61-90-5;	6106	C00123	HMDB00687
2892	lidocaine	Xenobiotics	Drug	35661	LC/MS Pos	100001538	2900	235.2	137-58-6;	3676	D00358	HMDB14426
989	linoleate (18:2n6)	Lipid	Polyunsaturated Fatty Acid (n3 and n6)	1105	LC/MS Neg	180	5533	279.3	60-33-3;	5280450	C01595	HMDB00673
991	linolenate [alpha or gamma; (18:3n3 or 6)]	Lipid	Polyunsaturated Fatty Acid (n3 and n6)	34035	LC/MS Neg	100001337	5450	277.3		5280934	C06427
69	lysine	Amino Acid	Lysine Metabolism	1301	LC/MS Pos	407	603	147.2	56-87-1;	5962	C00047	HMDB00182
925	malate	Energy	TCA Cycle	1303	GC/MS	409	1502	233	6915-15-7;	525	C00149	HMDB00156
803	maltose	Carbohydrate	Glycogen Metabolism	15806	GC/MS	913	2142.1	204.1	6363-53-7;	10991489	C00208	HMDB00163
798	maltotetraose	Carbohydrate	Glycogen Metabolism	15910	LC/MS Neg	100000275	965	665.1	34612-38-9;	446495	C02052	HMDB01296
800	maltotriose	Carbohydrate	Glycogen Metabolism	15913	LC/MS Neg	100000276	845	502.9	1109-28-0;	439586	C01835	HMDB01262
849	mannitol	Carbohydrate	Fructose, Mannose and Galactose Metabolism	15335	GC/MS	100000277	1839	319.1	69-65-8;	6251	C00392	HMDB00765
845	mannose	Carbohydrate	Fructose, Mannose and Galactose Metabolism	584	GC/MS	803	1753.5	204	3458-28-4;	18950	C00159	HMDB00169
954	margarate (17:0)	Lipid	Long Chain Fatty Acid	1121	LC/MS Neg	891	5733	269.3	506-12-7;	10465		HMDB02259
1000	mead acid (20:3n9)	Lipid	Polyunsaturated Fatty Acid (n3 and n6)	35174	LC/MS Neg	100001472	5642	305.4	20590-32-3;	5312531		HMDB10378
268	methionine	Amino Acid	Methionine, Cysteine, SAM and Taurine Metabolism	1302	LC/MS Pos	415	1252	150.1	63-68-3;	6137	C00073	HMDB00696
864	methyl-beta-glucopyranoside	Carbohydrate	Fructose, Mannose and Galactose Metabolism	40480	LC/MS Neg	100003693	1083	193.1	709-50-2;	2108
2902	metoprolol	Xenobiotics	Drug	18037	LC/MS Pos	2028	3205	268.2	56392-17-7;	4171	D02358	HMDB01932
2903	metoprolol acid metabolite*	Xenobiotics	Drug	34109	LC/MS Pos	100001385	2535	268.2	56392-14-4;	62936
1301	myo-inositol	Lipid	Inositol Metabolism	19934	GC/MS	363	1924.9	217	87-89-8;	892	C00137	HMDB00211
948	myristate (14:0)	Lipid	Long Chain Fatty Acid	1365	LC/MS Neg	519	5439	227.3	544-63-8;	11005	C06424	HMDB00806
949	myristoleate (14:1n5)	Lipid	Long Chain Fatty Acid	32418	LC/MS Neg	100001198	5338	225.3	544-64-9 ;	5281119	C08322	HMDB02000
2271	N1-Methyl-2-pyridone-5-carboxamide	Cofactors and Vitamins	Nicotinate and Nicotinamide Metabolism	40469	LC/MS Pos	100001468	1707.3	153.2	701-44-0;	69698	C05842	HMDB04193
2144	N1-methyladenosine	Nucleotide	Purine Metabolism, Adenine containing	15650	LC/MS Pos	1242	1356	282.1	15763-06-1;	27476	C02494	HMDB03331
2230	N4-acetylcytidine	Nucleotide	Pyrimidine Metabolism, Cytidine containing	35130	LC/MS Pos	100001413	2030	286.1	3768-18-1;	107461		HMDB05923
2154	N6-carbamoylthreonyladenosine	Nucleotide	Purine Metabolism, Adenine containing	35157	LC/MS Pos	100001415	2656	413	24719-82-2;
54	N-acetyl-3-methylhistidine*	Amino Acid	Histidine Metabolism	43256	LC/MS Neg	100002204	1369.1	210.1	37841-04-6;
25	N-acetylalanine	Amino Acid	Alanine and Aspartate Metabolism	1585	LC/MS Neg	1110	882	130.1	97-69-8;	88064	C02847	HMDB00766
2554	N-acetylalliin*	Xenobiotics	Food Component/Plant	45404	LC/MS Neg	100005367	1446	218.2
2219	N-acetyl-beta-alanine	Nucleotide	Pyrimidine Metabolism, Uracil containing	37432	LC/MS Pos	100002102	1460	132.1	3025-95-4;	76406	C01073
383	N-acetylcarnosine	Peptide	Dipeptide Derivative	43488	LC/MS Neg	100004046	1214	267.2	56353-15-2;	9903482
2	N-acetylglycine	Amino Acid	Glycine, Serine and Threonine Metabolism	27710	GC/MS	100001006	1396.4	143.9	543-24-8;	10972		HMDB00532
269	N-acetylmethionine	Amino Acid	Methionine, Cysteine, SAM and Taurine Metabolism	1589	LC/MS Neg	1083	1805	190.1	65-82-7;	448580	C02712	HMDB11745
94	N-acetylphenylalanine	Amino Acid	Phenylalanine and Tyrosine Metabolism	33950	LC/MS Neg	100001256	2590	206.2	2018-61-3;	74839	C03519	HMDB00512
15	N-acetylthreonine	Amino Acid	Glycine, Serine and Threonine Metabolism	33939	LC/MS Neg	100001274	846	160.1	17093-74-2;	152204	C01118
316	N-delta-acetylornithine*	Amino Acid	Urea cycle; Arginine and Proline Metabolism	43249	LC/MS Pos	100004523	836.2	175.1		9920500
2913	N-ethylglycinexylidide*	Xenobiotics	Drug	33080	LC/MS Pos	100001539	2584	207.2	7728-40-7;	24415	C16561	HMDB60656
270	N-formylmethionine	Amino Acid	Methionine, Cysteine, SAM and Taurine Metabolism	2829	LC/MS Neg	194	1541	176.1	4289-98-9;	439750	C03145	HMDB01015
2252	nicotinamide	Cofactors and Vitamins	Nicotinate and Nicotinamide Metabolism	594	LC/MS Pos	432	1267	123.1	98-92-0;	936	C00153	HMDB01406
320	N-methyl proline	Amino Acid	Urea cycle; Arginine and Proline Metabolism	37431	LC/MS Pos	100001956	833	130.1	475-11-6;	557
1297	N-oleoyltaurine	Lipid	Endocannabinoid	39732	LC/MS Neg	100003119	5599.9	388.3	52514-04-2;	6437033
964	nonadecanoate (19:0)	Lipid	Long Chain Fatty Acid	1356	LC/MS Neg	892	6073	297.3	646-30-0;	12591	C16535	HMDB00772
1299	N-palmitoyltaurine	Lipid	Endocannabinoid	39835	LC/MS Neg	100003239	5556.8	362.4	83982-06-3;
1298	N-stearoyltaurine	Lipid	Endocannabinoid	39730	LC/MS Neg	100003240	5785.9	390.3	63155-80-6;	168274
128	o-cresol sulfate	Amino Acid	Phenylalanine and Tyrosine Metabolism	36845	LC/MS Neg	100001806	2821	187		11615528
1073	octadecanedioate	Lipid	Fatty Acid, Dicarboxylate	36754	LC/MS Neg	100001615	5033	313.3	871-70-5;	70095		HMDB00782
1155	octanoylcarnitine	Lipid	Fatty Acid Metabolism(Acyl Carnitine)	33936	LC/MS Pos	100001247	4100	288.3	3671-77-0;	123701	C02838	HMDB00791
958	oleate (18:1n9)	Lipid	Long Chain Fatty Acid	1359	GC/MS	442	1984.4	339.2	112-80-1;	445639	C00712	HMDB00207
1166	oleoylcarnitine	Lipid	Fatty Acid Metabolism(Acyl Carnitine)	35160	LC/MS Pos	100001501	5202	426.4	38677-66-6;	644139253477789		HMDB05065
2921	omeprazole	Xenobiotics	Drug	38600	LC/MS Neg	100002725	4643.8	344.1	73590-58-6;	4594	C07324	HMDB01913
303	ornithine	Amino Acid	Urea cycle; Arginine and Proline Metabolism	35832	GC/MS	444	1940.3	174.1	3184-13-2;	6262	C00077	HMDB03374
3020	O-sulfo-L-tyrosine	Xenobiotics	Chemical	45413	LC/MS Neg	100005384	1006.1	260.1		514186
2776	p-acetamidophenylglucuronide	Xenobiotics	Drug	33423	LC/MS Neg	100000043	1377	326.1	120595-80-4;	83944		HMDB10316
951	palmitate (16:0)	Lipid	Long Chain Fatty Acid	1336	LC/MS Neg	424	5619	255.3	57-10-3;	985	C00249	HMDB00220
952	palmitoleate (16:1n7)	Lipid	Long Chain Fatty Acid	33447	LC/MS Neg	452	5477	253.3	373-49-9;	445638	C08362	HMDB03229
1290	palmitoyl ethanolamide	Lipid	Endocannabinoid	38165	LC/MS Neg	1489	6416	298.4	544-31-0;	4671	C16512	HMDB02100
1473	palmitoyl sphingomyelin	Lipid	Sphingolipid Metabolism	37506	GC/MS	100002107	2524	311.3	6254-89-3;	9939941
1163	palmitoylcarnitine	Lipid	Fatty Acid Metabolism(Acyl Carnitine)	22189	LC/MS Pos	100000776	5179	400.4	6865-14-1;	461	C02990	HMDB00222
2925	pantoprazole	Xenobiotics	Drug	38609	LC/MS Neg	100002808	4401.1	382.1	102625-70-7;	4679	C11806	HMDB05017
2277	pantothenate	Cofactors and Vitamins	Pantothenate and CoA Metabolism	1508	LC/MS Pos	1024	2218	220.1	137-08-6;	6613	C00864	HMDB00210
2407	paraxanthine	Xenobiotics	Xanthine Metabolism	18254	LC/MS Pos	100000453	2444	181.2	611-59-6;	4687	C13747	HMDB01860
122	p-cresol sulfate	Amino Acid	Phenylalanine and Tyrosine Metabolism	36103	LC/MS Neg	100001315	2896	187.1	3233-57-7;	4615423	C01468	HMDB11635
941	pelargonate (9:0)	Lipid	Medium Chain Fatty Acid	12035	LC/MS Neg	437	4847	157.2	112-05-0;	8158	C01601	HMDB00847
950	pentadecanoate (15:0)	Lipid	Long Chain Fatty Acid	1361	LC/MS Neg	980	5522	241.3	1002-84-2;10002-84-2;	13849	C16537	HMDB00826
120	phenol sulfate	Amino Acid	Phenylalanine and Tyrosine Metabolism	32553	LC/MS Neg	100001510	2150	173.1	937-34-8;	74426	C02180	HMDB60015
105	phenylacetylglutamine	Amino Acid	Phenylalanine and Tyrosine Metabolism	35126	LC/MS Pos	100001417	2868	265.2	28047-15-6;	92258	C04148	HMDB06344
93	phenylalanine	Amino Acid	Phenylalanine and Tyrosine Metabolism	64	LC/MS Pos	460	2056	166.1	63-91-2;	6140	C00079	HMDB00159
590	phenylalanyltryptophan	Peptide	Dipeptide	41377	LC/MS Neg	100003594	4142	350.2	24587-41-5;
98	phenyllactate (PLA)	Amino Acid	Phenylalanine and Tyrosine Metabolism	22130	LC/MS Neg	100000774	2237	165.1	828-01-3;	3848	C05607	HMDB00779
936	phosphate	Energy	Oxidative Phosphorylation	11438	GC/MS	461	1307.7	298.9	7664-38-2 ;	1061	C00009	HMDB01429
86	pipecolate	Amino Acid	Lysine Metabolism	1444	LC/MS Pos	1025	1120	130.1	4043-87-2;	849	C00408	HMDB00070
2684	piperine	Xenobiotics	Food Component/Plant	33935	LC/MS Pos	100001267	5136	286.2	94-62-2;	638024	C03882	HMDB29377
1573	pregn steroid monosulfate*	Lipid	Steroid	32619	LC/MS Neg	100002067	4998	397.3	1247-64-9;
1574	pregnanediol-3-glucuronide	Lipid	Steroid	40708	LC/MS Neg	100003470	5136.9	495.4	1852-49-9;	123796
1572	pregnen-diol disulfate*	Lipid	Steroid	32562	LC/MS Neg	100001993	3886	238.3
1545	pregnenolone sulfate	Lipid	Steroid	38170	LC/MS Neg	100002129	5089	395.3	1247-64-9 ;	105074		HMDB00774
324	pro-hydroxy-pro	Amino Acid	Urea cycle; Arginine and Proline Metabolism	35127	LC/MS Pos	100001167	960	229.2	18684-24-7;	11673055		HMDB06695
304	proline	Amino Acid	Urea cycle; Arginine and Proline Metabolism	1898	LC/MS Pos	480	796	116.1	147-85-3;	145742	C00148	HMDB00162
1137	propionylcarnitine	Lipid	Fatty Acid Metabolism (also BCAA Metabolism)	32452	LC/MS Pos	100001162	1589	218.2	17298-37-2 ;	107738	C03017	HMDB00824
2203	pseudouridine	Nucleotide	Pyrimidine Metabolism, Uracil containing	33442	LC/MS Neg	821	1104	243.1	1445-07-4;		C02067	HMDB00767
2347	pyridoxate	Cofactors and Vitamins	Vitamin B6 Metabolism	31555	LC/MS Neg	100001121	2210	182.1	82-82-6 ;	6723	C00847	HMDB00017
47	pyroglutamine*	Amino Acid	Glutamate Metabolism	32672	LC/MS Pos	100001540	764	129.2	2353-44-8;	134508
935	pyrophosphate (PPi)	Energy	Oxidative Phosphorylation	2078	GC/MS	495	1642.3	451	1466-09-3;2466-09-3;	644102	C00013	HMDB00250
754	pyruvate	Carbohydrate	Glycolysis, Gluconeogenesis, and Pyruvate Metabolism	599	GC/MS	823	1130.6	217	127-17-3;	1060	C00022	HMDB00243
2694	quinate	Xenobiotics	Food Component/Plant	18335	GC/MS	100000442	1793	345.1	77-95-2;	6508	C00296	HMDB03072
2941	quinine	Xenobiotics	Drug	39767	LC/MS Pos	100002968	2877.2	325.3	130-95-0;	2728270
2651	resveretrol sulfate 1	Xenobiotics	Food Component/Plant	42134	LC/MS Neg		3229.5	307.1
2652	resveretrol sulfate 2	Xenobiotics	Food Component/Plant	42135	LC/MS Neg		3637.7	307
2653	resveretrol sulfate 3	Xenobiotics	Food Component/Plant	42136	LC/MS Neg		3055.4	307.1
773	ribitol	Carbohydrate	Pentose Metabolism	15772	GC/MS	100000406	1692.4	217	488-81-3;	6912	C00474	HMDB00508
2948	salicylate	Xenobiotics	Drug	1515	LC/MS Neg	501	2226	137.1	69-72-7;	338	C00805	HMDB01895
2778	salicyluric glucuronide*	Xenobiotics	Drug	33384	LC/MS Neg	100001332	1463	370.1
4	sarcosine (N-Methylglycine)	Amino Acid	Glycine, Serine and Threonine Metabolism	1516	GC/MS	1023	1182.9	116	107-97-1;	1088	C00213	HMDB00271
1067	sebacate (decanedioate)	Lipid	Fatty Acid, Dicarboxylate	32398	LC/MS Neg	100001211	1778	201.2	111-20-6;	5192	C08277	HMDB00792
9	serine	Amino Acid	Glycine, Serine and Threonine Metabolism	32315	GC/MS	503	1656.3	320.2	56-45-1;	5951	C00065	HMDB00187
202	serotonin (5HT)	Amino Acid	Tryptophan Metabolism	2342	LC/MS Pos	504	1660	177.1	153-98-0;	5202	C00780	HMDB00259
288	S-methylcysteine	Amino Acid	Methionine, Cysteine, SAM and Taurine Metabolism	39592	LC/MS Pos	100002749	869.1	136	1187-84-4;	24417		HMDB02108
2715	stachydrine	Xenobiotics	Food Component/Plant	34384	LC/MS Pos	100001296	860	144.1	4136-37-2;	115244	C10172	HMDB04827
956	stearate (18:0)	Lipid	Long Chain Fatty Acid	1358	LC/MS Neg	439	5886	283.4	57-11-4;	5281	C01530	HMDB00827
982	stearidonate (18:4n3)	Lipid	Polyunsaturated Fatty Acid (n3 and n6)	33969	LC/MS Neg	100001229	5381	275.3	111174-40-4 ;	5312508	C16300	HMDB06547
1474	stearoyl sphingomyelin	Lipid	Sphingolipid Metabolism	19503	GC/MS	1538	2645	311.3	85187-10-6;85187-10-6_x000D_ ;	6453725	C00550	HMDB01348
1164	stearoylcarnitine	Lipid	Fatty Acid Metabolism(Acyl Carnitine)	34409	LC/MS Pos	100001391	5300	428.4	18822-91-8;	6426855		HMDB00848
923	succinate	Energy	TCA Cycle	1437	LC/MS Neg	252	618	117.1	110-15-6;	1110	C00042	HMDB00254
922	succinylcarnitine	Energy	TCA Cycle	37058	LC/MS Pos	100001948	1401	262.1
1653	taurochenodeoxycholate	Lipid	Primary Bile Acid Metabolism	18494	LC/MS Neg	1629	5218	498.3	6009-98-9;	387316	C05465	HMDB00951
1650	taurocholate	Lipid	Primary Bile Acid Metabolism	18497	LC/MS Neg	1648	5122	514.3	145-42-6;	6675	C05122	HMDB00036
1689	taurocholenate sulfate*	Lipid	Secondary Bile Acid Metabolism	32807	LC/MS Neg	100001990	4762	279.8
1661	taurodeoxycholate	Lipid	Secondary Bile Acid Metabolism	12261	LC/MS Neg	1668	5243	498.3	207737-97-1;	2733768	C05463	HMDB00896
1668	taurolithocholate 3-sulfate	Lipid	Secondary Bile Acid Metabolism	36850	LC/MS Neg	100001658	5002	280.8	64936-83-0;	440071	C03642	HMDB02580
1071	tetradecanedioate	Lipid	Fatty Acid, Dicarboxylate	35669	LC/MS Neg	100001613	3970	257.2	821-38-5;	13185		HMDB00872
2408	theobromine	Xenobiotics	Xanthine Metabolism	18392	LC/MS Pos	100000445	2136	181.1	83-67-0;	5429	C07480	HMDB02825
2409	theophylline	Xenobiotics	Xanthine Metabolism	18394	LC/MS Neg	100000437	2361	179.1	58-55-9;	2153	C07130	HMDB01889
783	threitol	Carbohydrate	Pentose Metabolism	35854	GC/MS	100001419	1513	217.1	2418-52-2;	169019	C16884	HMDB04136
2287	threonate	Cofactors and Vitamins	Ascorbate and Aldarate Metabolism	27738	GC/MS	100001022	1560.7	292.1	70753-61-6;	151152	C01620	HMDB00943
14	threonine	Amino Acid	Glycine, Serine and Threonine Metabolism	1284	LC/MS Pos	564	713	120.1	72-19-5;	6288	C00188	HMDB00167
2723	thymol sulfate	Xenobiotics	Food Component/Plant	36095	LC/MS Neg	100001757	4395	229.1	89-83-8;		C09908	HMDB01878
322	trans-4-hydroxyproline	Amino Acid	Urea cycle; Arginine and Proline Metabolism	32306	LC/MS Pos	1001	705	132.1	51-35-4;	5810	C01157	HMDB00725
57	trans-urocanate	Amino Acid	Histidine Metabolism	607	LC/MS Pos	537	1119	139.1	104-98-3;	736715	C00785	HMDB00301
2269	trigonelline (N'-methylnicotinate)	Cofactors and Vitamins	Nicotinate and Nicotinamide Metabolism	32401	LC/MS Pos	100001092	757	138.1	6138-41-6 ;	5570	C01004	HMDB00875
176	tryptophan	Amino Acid	Tryptophan Metabolism	54	LC/MS Pos	565	2445	205.1	73-22-3;	6305	C00078	HMDB00929
210	tryptophan betaine	Amino Acid	Tryptophan Metabolism	37097	LC/MS Pos	100001743	2464	247.1	20671-76-5;	442106	C09213	HMDB61115
106	tyrosine	Amino Acid	Phenylalanine and Tyrosine Metabolism	1299	LC/MS Pos	815	1516	182.1	60-18-4;	6057	C00082	HMDB00158
2125	urate	Nucleotide	Purine Metabolism, (Hypo)Xanthine/Inosine containing	1604	LC/MS Neg	1134	769	167.1	69-93-2;120K5305;	1175	C00366	HMDB00289
302	urea	Amino Acid	Urea cycle; Arginine and Proline Metabolism	1670	GC/MS	533	1223.9	171	57-13-6;	1176	C00086	HMDB00294
2201	uridine	Nucleotide	Pyrimidine Metabolism, Uracil containing	606	LC/MS Neg	535	1430	243.1	58-96-8;	6029	C00299	HMDB00296
258	valine	Amino Acid	Leucine, Isoleucine and Valine Metabolism	1649	LC/MS Pos	566	1040	118.1	72-18-4;	6287	C00183	HMDB00883
2966	venlafaxine	Xenobiotics	Drug	38623	LC/MS Pos	100002807	3700	278.2	93413-69-5;	5656	C07187	HMDB05016
2118	xanthine	Nucleotide	Purine Metabolism, (Hypo)Xanthine/Inosine containing	3147	GC/MS	1004	1889.9	353	69-89-6;	1188	C00385	HMDB00292
779	xylitol	Carbohydrate	Pentose Metabolism	4966	GC/MS	543	1677.6	307.2	87-99-0;	6912	C00379	HMDB02917
777	xylonate	Carbohydrate	Pentose Metabolism	35638	GC/MS	100001627	1722	292	73686-31-7;	6602431	C05411
* indicates compounds that have not been officially "plexed" (based on a standard), but we are confident in its identity

## Sheet: Supplementary_table_S2
Supplementary Table S2: Adipose tissue metabolites identification data
PATHWAY_SORTORDER	BIOCHEMICAL	SUPER_PATHWAY	SUB_PATHWAY	COMP_ID	PLATFORM	CHEMICAL_ID	RI	MASS	CAS	PUBCHEM	CHEMSPIDER	KEGG	Group HMDB_ID
761	1,5-anhydroglucitol (1,5-AG)	Carbohydrate	Glycolysis, Gluconeogenesis, and Pyruvate Metabolism	20675	LC/MS Neg	100000580	802	163.061	154-58-5	64960		C07326	HMDB02712
1423	1-arachidonoylglycerophosphocholine (20:4n6)*	Lipid	Lysolipid	34061	LC/MS Neg	100001551	6074	618.341			21403155	C05208	HMDB10395
1452	1-arachidonoylglycerophosphoethanolamine*	Lipid	Lysolipid	35186	LC/MS Neg	100001571	5874	500.278		42607465	21403171		HMDB11517
1473	1-arachidonoylglycerophosphoinositol*	Lipid	Lysolipid	34214	LC/MS Neg	100001654	5482	619.289					HMDB61690
1545	1-arachidonylglycerol	Lipid	Monoacylglycerol	34397	LC/MS Neg	100001433	6450	303.233	35474-99-8	5282281	4445452	C13857	HMDB11572
1542	1-linoleoylglycerol (1-monolinolein)	Lipid	Monoacylglycerol	27447	LC/MS Neg	100001040	6477	279.233	2277-28-3	5283469	4446589
1411	1-linoleoylglycerophosphocholine (18:2n6)	Lipid	Lysolipid	34419	LC/MS Neg	100001395	6160	594.341		11988421	10160888	C04100	HMDB10386
1448	1-linoleoylglycerophosphoethanolamine*	Lipid	Lysolipid	32635	LC/MS Neg	100001570	5900	476.278		52925130	21403170		HMDB11507
65	1-methylhistamine	Amino Acid	Histidine Metabolism	43831	LC/MS Pos	100001204	585.5	126.103	501-75-7	3614	3488	C05127	HMDB00898
69	1-methylimidazoleacetate	Amino Acid	Histidine Metabolism	32350	LC/MS Pos	100001208	833	141.066	2625-49-2	75810	68319	C05828	HMDB02820
2507	1-methylnicotinamide	Cofactors and Vitamins	Nicotinate and Nicotinamide Metabolism	27665	LC/MS Pos	55	691.3	137.071	1005-24-9	10129985	8305504	C02918	HMDB00699
1408	1-oleoylglycerophosphocholine (18:1)	Lipid	Lysolipid	48258	LC/MS Neg	100001272	6250	596.357	19420-56-5	16081932	17240641		HMDB02815
1444	1-oleoylglycerophosphoethanolamine	Lipid	Lysolipid	35628	LC/MS Neg	100001569	6125.1	478.294	89576-29-4	9547071	7826021		HMDB11506
1491	1-oleoylglycerophosphoglycerol*	Lipid	Lysolipid	45968	LC/MS Neg	100005716	5610	509.288
1436	1-oleoylplasmenylethanolamine*	Lipid	Lysolipid	44621	LC/MS Neg	100005372	6250	462.299
1535	1-palmitoylglycerol (1-monopalmitin)	Lipid	Monoacylglycerol	21127	LC/MS Neg	100000827	6400	255.233	542-44-9	14900	14201		HMDB31074
1400	1-palmitoylglycerophosphocholine (16:0)	Lipid	Lysolipid	33955	LC/MS Neg	100001263	6380	570.341	17364-16-8	86554	78064		HMDB10382
1439	1-palmitoylglycerophosphoethanolamine	Lipid	Lysolipid	35631	LC/MS Neg	100001567	6057.2	452.278		9547069	7826019		HMDB11503
1434	1-palmitoylplasmenylethanolamine*	Lipid	Lysolipid	39270	LC/MS Neg	100003000	6285	436.283			10471193
1406	1-stearoylglycerophosphocholine (18:0)	Lipid	Lysolipid	33961	LC/MS Pos	100001271	5847	524.371	19420-57-6	497299	435389		HMDB10384
1442	1-stearoylglycerophosphoethanolamine	Lipid	Lysolipid	42398	LC/MS Neg	100001461	6514	480.31	69747-55-3	9547068	7826018		HMDB11130
1465	1-stearoylglycerophosphoinositol	Lipid	Lysolipid	19324	LC/MS Neg	100000656	5794.3	599.32	796963-93-4		21403067		HMDB61696
1475	1-stearoylglycerophosphoserine*	Lipid	Lysolipid	45966	LC/MS Neg	100004327	5800	524.299		9547101	7826051
1435	1-stearoylplasmenylethanolamine*	Lipid	Lysolipid	39271	LC/MS Neg	100003001	6500	464.315
987	10-heptadecenoate (17:1n7)	Lipid	Long Chain Fatty Acid	33971	LC/MS Neg	100001278	5555	267.233	29743-97-3	5312435	4471860		HMDB60038
997	10-nonadecenoate (19:1n9)	Lipid	Long Chain Fatty Acid	33972	LC/MS Neg	100001277	5780	295.264	73033-09-7	5312513	4471938		HMDB13622
1084	15-methylpalmitate (isobar with 2-methylpalmitate)	Lipid	Fatty Acid, Branched	38768	LC/MS Neg	100002945	5695	269.249		17903417
78	2-aminoadipate	Amino Acid	Lysine Metabolism	6146	LC/MS Pos	381	793.3	162.076	542-32-5;1118-90-7	469	456	C00956	HMDB00510
1546	2-arachidonoyl glycerol	Lipid	Monoacylglycerol	19266	LC/MS Neg	100000584	6170	303.233	53847-30-6	5282280	4445451	C13856	HMDB04666
303	2-hydroxybutyrate (AHB)	Amino Acid	Methionine, Cysteine, SAM and Taurine Metabolism	21044	LC/MS Neg	100000933	775	103.04	3347-90-8	440864	389701	C05984	HMDB00008
1098	2-hydroxyglutarate	Lipid	Fatty Acid, Dicarboxylate	37253	LC/MS Polar	100002070	3352.8	147.03	40951-21-1	43	42	C02630	HMDB00606
1226	2-hydroxypalmitate	Lipid	Fatty Acid, Monohydroxy	35675	LC/MS Neg	100001579	5511.2	271.228	764-67-0	92836	83805		HMDB31057
1543	2-linoleoylglycerol (2-monolinolein)	Lipid	Monoacylglycerol	32506	LC/MS Neg	100000987	6250	279.233	3443-82-1	5365676	4517636		HMDB11538
268	2-methylbutyrylcarnitine (C5)	Amino Acid	Leucine, Isoleucine and Valine Metabolism	45095	LC/MS Pos	100001509	2465	246.17	31023-25-3	6426901	4932320		HMDB00378
1541	2-oleoylglycerol (2-monoolein)	Lipid	Monoacylglycerol	21232	LC/MS Neg	100000943	6950	281.249	3443-84-3	5319879	4478086
1403	2-palmitoleoylglycerophosphocholine*	Lipid	Lysolipid	35819	LC/MS Pos	100001561	5490	494.324			21403164
1401	2-palmitoylglycerophosphocholine*	Lipid	Lysolipid	35253	LC/MS Neg	100001562	6215	570.341		15061532	21403165		HMDB61702
120	3-(4-hydroxyphenyl)lactate	Amino Acid	Phenylalanine and Tyrosine Metabolism	32197	LC/MS Neg	240	1379	181.051	6482-98-0	9378	9010	C03672	HMDB00755
1120	3-carboxy-4-methyl-5-propyl-2-furanpropanoate (CMPF)	Lipid	Fatty Acid, Dicarboxylate	31787	LC/MS Pos	100001178	5011	241.107	86879-39-2	123979	110498		HMDB61112
1591	3-hydroxy-3-methylglutarate	Lipid	Mevalonate Metabolism	531	LC/MS Polar	112	2700	161.046	503-49-1	1662	4573695	C03761	HMDB00355
1231	3-hydroxydecanoate	Lipid	Fatty Acid, Monohydroxy	22053	LC/MS Neg	100000997	4634.7	187.134	5561-87-5	26612	24790		HMDB02203
1230	3-hydroxyoctanoate	Lipid	Fatty Acid, Monohydroxy	22001	LC/MS Neg	100000773	3446	159.103	88930-08-9	26613	24791		HMDB01954
1232	3-hydroxysebacate	Lipid	Fatty Acid, Monohydroxy	31943	LC/MS Neg	100001145	1282.1	217.108	73141-46-5	3017884	2285525		HMDB00350
200	3-indoxyl sulfate	Amino Acid	Tryptophan Metabolism	27672	LC/MS Neg	100000467	2222.2	212.002	2642-37-7	10258	9840		HMDB00682
279	3-methyl-2-oxobutyrate	Amino Acid	Leucine, Isoleucine and Valine Metabolism	44526	LC/MS Neg	100000936	1465	115.04	3715-29-5	49	48	C00141	HMDB00019
778	3-phosphoglycerate	Carbohydrate	Glycolysis, Gluconeogenesis, and Pyruvate Metabolism	1414	LC/MS Neg	132	583	184.986	80731-10-8	724	10669764	C00597	HMDB00807
3077	4-acetamidophenol	Xenobiotics	Drug	12032	LC/MS Pos	1383	2208.2	152.071	103-90-2	1983	1906	C06804	HMDB01859
3078	4-acetamidophenylglucuronide	Xenobiotics	Drug	15736	LC/MS Neg	100000043	1400	326.088	120595-80-4	83944	3239926		HMDB10316
3076	4-acetaminophen sulfate	Xenobiotics	Drug	37475	LC/MS Neg	2049	1792	230.013	10066-90-7;32113-41-0	83939	75741	C06804	HMDB59911
1710	4-androsten-3beta,17beta-diol disulfate (1)	Lipid	Steroid	37202	LC/MS Neg	100001992	3740	224.062		10634		C04295	HMDB03818
371	4-guanidinobutanoate	Amino Acid	Guanidino and Acetamido Metabolism	15681	LC/MS Neg	100000096	819	144.078	463-003;463-00-3	500	486	C01035	HMDB03464
385	4-hydroxy-nonenal-glutathione	Amino Acid	Glutathione Metabolism	48504	LC/MS Pos	100006240	3856	464.206	99927-70-5
2618	4-hydroxybenzoate	Xenobiotics	Benzoate Metabolism	21133	LC/MS Neg	100000862	820	137.024	99-96-7	135	132	C00156	HMDB00500
238	4-methyl-2-oxopentanoate	Amino Acid	Leucine, Isoleucine and Valine Metabolism	22116	LC/MS Neg	100000551	2170	129.056	816-66-0	70	69	C00233	HMDB00695
381	5-oxoproline	Amino Acid	Glutathione Metabolism	1494	LC/MS Polar	1021	2179	128.035	98-79-3	7405	7127	C01879	HMDB00267
1195	acetylcarnitine	Lipid	Fatty Acid Metabolism(Acyl Carnitine)	32198	LC/MS Pos	100000802	1166.9	204.123	5080-50-2	1	5406074	C02571	HMDB00201
966	acetylphosphate	Energy	Oxidative Phosphorylation	15488	LC/MS Polar	1211	4013.9	138.98	94249-01-1	186	181	C00227	HMDB01494
358	acisoga	Amino Acid	Polyamine Metabolism	43258	LC/MS Pos	100004541	2290	185.128	106692-36-8	129397	114601
2380	adenine	Nucleotide	Purine Metabolism, Adenine containing	554	LC/MS Pos	880	1002	136.062	73-24-5	190	185	C00147	HMDB00034
2379	adenosine	Nucleotide	Purine Metabolism, Adenine containing	555	LC/MS Pos	798	1625.3	268.104	58-61-7	60961	54923	C00212	HMDB00050
2375	adenosine 3',5'-cyclic monophosphate (cAMP)	Nucleotide	Purine Metabolism, Adenine containing	2831	LC/MS Neg	207	1952.2	328.045	60-92-4	6076	268	C00575	HMDB00058
2515	adenosine 5'-diphosphoribose (ADP-ribose)	Cofactors and Vitamins	Nicotinate and Nicotinamide Metabolism	558	LC/MS Pos	215	1040	560.079	68414-18-6	192	3674071	C00301	HMDB01178
2372	adenosine 5'-monophosphate (AMP)	Nucleotide	Purine Metabolism, Adenine containing	32342	LC/MS Pos	209	1208	348.07	149022-20-8	6083	10239183	C00020	HMDB00045
1028	adrenate (22:4n6)	Lipid	Polyunsaturated Fatty Acid (n3 and n6)	32980	LC/MS Neg	100001193	5678	331.264	2091-25-0	5497181	4445971	C16527	HMDB02226
24	alanine	Amino Acid	Alanine and Aspartate Metabolism	1126	LC/MS Pos	811	696	90.055	56-41-7	5950	5735	C00041	HMDB00161
419	alanylleucine	Peptide	Dipeptide	37093	LC/MS Pos	100001890	2165	203.139	1638-60-4	259583	227831		HMDB28691
951	alpha-ketoglutarate	Energy	TCA Cycle	528	LC/MS Polar	93	2700	145.014	305-72-6;328-50-7;22202-68-2	51	50	C00026	HMDB00208
2534	alpha-tocopherol	Cofactors and Vitamins	Tocopherol Metabolism	1561	GC/MS	1105	2305.4	502.5	59-02-9;10191-41-0	14985	14265	C02477	HMDB01893
999	arachidate (20:0)	Lipid	Long Chain Fatty Acid	1118	LC/MS Neg	893	6295	311.296	506-30-9	10467	10035	C06425	HMDB02212
1027	arachidonate (20:4n6)	Lipid	Polyunsaturated Fatty Acid (n3 and n6)	1110	LC/MS Neg	229	5535	303.233	506-32-1	444899	392692	C00219	HMDB01043
1588	arachidoyl sphingomyelin*	Lipid	Sphingolipid Metabolism	48490	LC/MS Polar	100006290	913	803.628			23113477
321	arginine	Amino Acid	Urea cycle; Arginine and Proline Metabolism	1638	LC/MS Polar	231	5285	173.104	1119-34-2	232	227	C00062	HMDB00517
29	asparagine	Amino Acid	Alanine and Aspartate Metabolism	512	LC/MS Polar	917	2951.1	131.046	70-47-3	6267	6031	C00152	HMDB00168
27	aspartate	Amino Acid	Alanine and Aspartate Metabolism	443	LC/MS Polar	234	3500	132.03	56-84-8	5960	5745	C00049	HMDB00191
1586	behenoyl sphingomyelin*	Lipid	Sphingolipid Metabolism	48492	LC/MS Polar	100006294	901	831.66
2609	benzoate	Xenobiotics	Benzoate Metabolism	15778	LC/MS Neg	100000008	1750	121.029	65-85-0	243	238	C00180	HMDB01870
247	beta-hydroxyisovaleroylcarnitine	Amino Acid	Leucine, Isoleucine and Valine Metabolism	35433	LC/MS Pos	100001594	1701	262.165	99159-87-2		21403176
2536	beta-tocopherol	Cofactors and Vitamins	Tocopherol Metabolism	42316	GC/MS	100001641	2260	222.1	148-03-8	6857447	5256784	C14152	HMDB06335
1178	butyrylcarnitine	Lipid	Fatty Acid Metabolism (also BCAA Metabolism)	32412	LC/MS Pos	100001054	1977	232.154	25576-40-3	439829	184820	C02862	HMDB02013
232	C-glycosyltryptophan	Amino Acid	Tryptophan Metabolism	48782	LC/MS Neg	100006379	1777	365.135	180509-18-6	10981970	9157171
2659	caffeine	Xenobiotics	Xanthine Metabolism	569	LC/MS Pos	849	2819	195.088	58-08-2	2519	2424	C07481	HMDB01847
1214	carnitine	Lipid	Carnitine Metabolism	15500	LC/MS Pos	100000007	688.9	162.112	461-05-2	10917	10455	C00318	HMDB00062
1603	cholesterol	Lipid	Sterol	63	GC/MS	266	2316.9	329.3	57-88-5	11025495	4937803	C00187	HMDB00067
1383	choline	Lipid	Phospholipid Metabolism	15506	LC/MS Pos	1256	675	104.107	67-48-1	305	149278	C00114	HMDB00097
1384	choline phosphate	Lipid	Phospholipid Metabolism	34396	LC/MS Pos	267	692.5	184.073	72556-74-2	1014	119298	C00588	HMDB01565
992	cis-vaccenate (18:1n7)	Lipid	Long Chain Fatty Acid	33970	GC/MS	100001228	1987	339.3	506-17-2	5282761	4445888	C08367	HMDB03231
325	citrulline	Amino Acid	Urea cycle; Arginine and Proline Metabolism	2132	LC/MS Pos	391	730.3	176.103	372-75-8	9750	810	C00327	HMDB00904
349	creatine	Amino Acid	Creatine Metabolism	27718	LC/MS Polar	1221	2920	130.062	57-00-1	586	566	C00300	HMDB00064
352	creatine phosphate	Amino Acid	Creatine Metabolism	33951	LC/MS Neg	100000112	603	210.029	922-32-7	587	567	C02305	HMDB01511
350	creatinine	Amino Acid	Creatine Metabolism	513	LC/MS Neg	275	1071.8	112.052	60-27-5	588	568	C00791	HMDB00562
304	cysteine	Amino Acid	Methionine, Cysteine, SAM and Taurine Metabolism	31453	GC/MS	800	1560.1	218	52-90-4;56-89-3	5862	5653	C00097	HMDB00574
312	cysteine sulfinic acid	Amino Acid	Methionine, Cysteine, SAM and Taurine Metabolism	37443	LC/MS Neg	100002113	637.5	152.002	207121-48-0	109	107	C00606	HMDB00996
376	cysteine-glutathione disulfide	Amino Acid	Glutathione Metabolism	46734	LC/MS Pos	100001437	824	427.095	13081-14-6	4247235	3455404		HMDB00656
2469	cytidine	Nucleotide	Pyrimidine Metabolism, Cytidine containing	514	LC/MS Pos	827	1075.9	244.093	65-46-3	6175	5940	C00475	HMDB00089
2466	cytidine 5'-monophosphate (5'-CMP)	Nucleotide	Pyrimidine Metabolism, Cytidine containing	2372	LC/MS Pos	282	890	324.059	63-37-6	6131	5414497	C00055	HMDB00095
1694	dehydroisoandrosterone sulfate (DHEA-S)	Lipid	Steroid	32425	LC/MS Neg	100000792	4745	367.158	651-48-9	12594	12074	C04555	HMDB01032
1213	deoxycarnitine	Lipid	Carnitine Metabolism	36747	LC/MS Pos	100001662	742.4	146.118	6249-56-5	134	705	C01181	HMDB01161
1031	dihomo-linoleate (20:2n6)	Lipid	Polyunsaturated Fatty Acid (n3 and n6)	17805	LC/MS Neg	1231	5730	307.264	2091-39-6	6439848	4944228	C16525	HMDB05060
1026	dihomo-linolenate (20:3n3 or n6)	Lipid	Polyunsaturated Fatty Acid (n3 and n6)	35718	LC/MS Neg	100001739	5596	305.249	17046-59-2	5280581	4471954	C03242	HMDB02925
773	dihydroxyacetone phosphate (DHAP)	Carbohydrate	Glycolysis, Gluconeogenesis, and Pyruvate Metabolism	15522	LC/MS Neg	309	603	168.991	102783-56-2	668	3833110	C00111	HMDB01473
332	dimethylarginine (SDMA + ADMA)	Amino Acid	Urea cycle; Arginine and Proline Metabolism	36808	LC/MS Pos	100001810	810	203.15	102783-24-4	123831	110375	C03626	HMDB01539
1030	docosadienoate (22:2n6)	Lipid	Polyunsaturated Fatty Acid (n3 and n6)	32415	LC/MS Neg	100001182	6034	335.296	7370-49-2	5282807	4445934	C16533	HMDB61714
1018	docosahexaenoate (DHA; 22:6n3)	Lipid	Polyunsaturated Fatty Acid (n3 and n6)	44675	LC/MS Neg	100000665	5525	327.233	6217-54-5	445580	393183	C06429	HMDB02183
1017	docosapentaenoate (n3 DPA; 22:5n3)	Lipid	Polyunsaturated Fatty Acid (n3 and n6)	32504	LC/MS Neg	100001181	5571	329.249	2234-74-4	6441454		C16513	HMDB01976
1029	docosapentaenoate (n6 DPA; 22:5n6)	Lipid	Polyunsaturated Fatty Acid (n3 and n6)	37478	LC/MS Neg	100001580	5624.5	329.249	25182-74-5	6441454	4945614	C16513	HMDB01976
1016	eicosapentaenoate (EPA; 20:5n3)	Lipid	Polyunsaturated Fatty Acid (n3 and n6)	18467	LC/MS Neg	2050	5450	301.217	10-2005-9;10417-94-4	446284	393682	C06428	HMDB01999
1002	eicosenoate (20:1n9 or 11)	Lipid	Long Chain Fatty Acid	33587	LC/MS Neg	100001335	5950	309.28		5282768	4445895		HMDB02231
2864	ergothioneine	Xenobiotics	Food Component/Plant	37459	LC/MS Pos	100002154	823	230.096	58511-63-0	3032311	2297320	C05570	HMDB03045
1006	erucate (22:1n9)	Lipid	Long Chain Fatty Acid	1552	LC/MS Neg	1087	6355.6	337.311	112-86-7	5281116	7924	C08316	HMDB02068
939	erythronate*	Carbohydrate	Aminosugar Metabolism	42420	LC/MS Polar	100001320	2186	135.03	88759-55-1	2781043	2061231		HMDB00613
1587	euricoyl sphingomyelin*	Lipid	Sphingolipid Metabolism	48493	LC/MS Polar	100006295	910	829.644			29368329
2518	flavin adenine dinucleotide (FAD)	Cofactors and Vitamins	Riboflavin Metabolism	2134	LC/MS Neg	327	2425	784.15	146-14-5;84366-81-4	643975	559059	C00016	HMDB01248
955	fumarate	Energy	TCA Cycle	1643	LC/MS Polar	330	3084	115.004	100-17-8	444972	10197150	C00122	HMDB00134
392	gamma-glutamylglutamine	Peptide	Gamma-glutamyl Amino Acid	2730	LC/MS Pos	1140	817.9	276.119	10148-81-9	150914	133013	C05283	HMDB11738
393	gamma-glutamylglycine	Peptide	Gamma-glutamyl Amino Acid	33949	LC/MS Neg	100001294	640	203.067	1948-29-4	165527	145071		HMDB11667
2539	gamma-tocopherol	Cofactors and Vitamins	Tocopherol Metabolism	33420	GC/MS	100001308	2264	488.4	54-28-4	14986	14266	C02483	HMDB01492
864	glucarate 1,4-lactone	Carbohydrate	Disaccharides and Oligosaccharides	35647	LC/MS Pos	100000946	869	210.061	61278-30-6	16219942	17347255
764	glucose	Carbohydrate	Glycolysis, Gluconeogenesis, and Pyruvate Metabolism	20488	LC/MS Polar	572	2342	179.056	50-99-7	79025	71358	C00031	HMDB00122
765	glucose-6-phosphate (G6P)	Carbohydrate	Glycolysis, Gluconeogenesis, and Pyruvate Metabolism	31260	GC/MS	291	2042.7	387.2	103192-55-8	5958	19952394	C00668	HMDB01401
916	glucuronate	Carbohydrate	Aminosugar Metabolism	15443	LC/MS Neg	100000257	639	193.035	207300-70-7	444791	58552	C00191	HMDB00127
37	glutamate	Amino Acid	Glutamate Metabolism	57	LC/MS Pos	561	710	148.06	56-86-0	611	591	C00025	HMDB00148
38	glutamine	Amino Acid	Glutamate Metabolism	53	LC/MS Polar	563	2969	145.062	56-85-9	5961	5746	C00064	HMDB00641
81	glutarate (pentanedioate)	Amino Acid	Lysine Metabolism	396	LC/MS Polar	339	2900	131.035	110-94-1	743	3618533	C00489	HMDB00661
374	glutathione, oxidized (GSSG)	Amino Acid	Glutathione Metabolism	27727	LC/MS Neg	448	638	611.145	103239-24-3	65359	58835	C00127	HMDB03337
373	glutathione, reduced (GSH)	Amino Acid	Glutathione Metabolism	2127	LC/MS Pos	496	1270	308.091	70-18-8	124886	111188	C00051	HMDB00125
784	glycerate	Carbohydrate	Glycolysis, Gluconeogenesis, and Pyruvate Metabolism	1572	LC/MS Neg	1052	650	105.019	600-19-1	752	732	C00258	HMDB00139
1524	glycerol	Lipid	Glycerolipid Metabolism	15122	LC/MS Neg	1254	758	91.0401	56-81-5	753	733	C00116	HMDB00131
1525	glycerol 3-phosphate (G3P)	Lipid	Glycerolipid Metabolism	43847	LC/MS Polar	100000258	3938.7	171.006	29849-82-9	754	734	C00093	HMDB00126
1392	glycerophosphoethanolamine	Lipid	Phospholipid Metabolism	37455	LC/MS Polar	100001620	3075	214.049	33049-08-0	123874	110410	C01233	HMDB00114
1386	glycerophosphorylcholine (GPC)	Lipid	Phospholipid Metabolism	15990	LC/MS Polar	100000269	3003.1	302.101	28319-77-9	71920	571409	C00670	HMDB00086
1	glycine	Amino Acid	Glycine, Serine and Threonine Metabolism	58	LC/MS Pos	340	700	263.147	56-40-6	750	730	C00037	HMDB00123
501	glycylleucine	Peptide	Dipeptide	34398	LC/MS Pos	100001258	2190.9	189.123	869-19-2	92843	83812	C02155	HMDB00759
2413	guanine	Nucleotide	Purine Metabolism, Guanine containing	32352	LC/MS Neg	172	1330	150.042	73-40-5	764	744	C00242	HMDB00132
2412	guanosine	Nucleotide	Purine Metabolism, Guanine containing	1573	LC/MS Neg	1099	1662	282.084	118-00-3	6802	6544	C00387	HMDB00133
902	guanosine 5'-diphospho-fucose	Carbohydrate	Nucleotide Sugar	15903	LC/MS Neg	335	755	588.075	15839-70-0		21402997
2568	heme	Cofactors and Vitamins	Hemoglobin and Porphyrin Metabolism	41754	LC/MS Neg	100001386	5325	632.172	14875-96-8	26945		C00032	HMDB03178
1198	hexanoylcarnitine	Lipid	Fatty Acid Metabolism(Acyl Carnitine)	32328	LC/MS Pos	100000781	3194	260.186	6920-35-0	6426853	4932273		HMDB00705
2597	hippurate	Xenobiotics	Benzoate Metabolism	15753	LC/MS Neg	100000014	2106.9	178.051	495-69-2	464	451	C01586	HMDB00714
64	histamine	Amino Acid	Histidine Metabolism	1574	LC/MS Pos	354	579	112.087	51-45-6	774	753	C00388	HMDB00870
52	histidine	Amino Acid	Histidine Metabolism	59	LC/MS Neg	355	755.9	154.062	5934-29-2	6274	752	C00135	HMDB00177
1196	hydroxybutyrylcarnitine*	Lipid	Fatty Acid Metabolism(Acyl Carnitine)	43264	LC/MS Pos	100003926	1477	248.149		53481617			HMDB13127
313	hypotaurine	Amino Acid	Methionine, Cysteine, SAM and Taurine Metabolism	590	LC/MS Pos	358	690	110.027	300-84-5	107812	96959	C00519	HMDB00965
2358	hypoxanthine	Nucleotide	Purine Metabolism, (Hypo)Xanthine/Inosine containing	3127	LC/MS Polar	171	1515.8	135.031	68-94-0	790	768	C00262	HMDB00157
195	indolelactate	Amino Acid	Tryptophan Metabolism	18349	LC/MS Neg	100000463	2286	204.067	832-97-3	92904	83867	C02043	HMDB00671
2357	inosine	Nucleotide	Purine Metabolism, (Hypo)Xanthine/Inosine containing	1123	LC/MS Polar	361	1773.6	267.073	58-63-9	6021	21241953	C00294	HMDB00195
1364	inositol 1-phosphate (I1P)	Lipid	Inositol Metabolism	1481	GC/MS	370	2057.8	318.1	573-35-3;106032-59-1	440194	17215924	C04006	HMDB00213
771	Isobar: fructose 1,6-diphosphate, glucose 1,6-diphosphate, myo-inositol 1,4 or 1,3-diphosphate	Carbohydrate	Glycolysis, Gluconeogenesis, and Pyruvate Metabolism	46896	LC/MS Neg	100002180	551	338.989
280	isobutyrylcarnitine	Amino Acid	Leucine, Isoleucine and Valine Metabolism	33441	LC/MS Pos	100001055	1955.1	232.154	25518-49-4	168379			HMDB00736
264	isoleucine	Amino Acid	Leucine, Isoleucine and Valine Metabolism	1125	LC/MS Pos	376	1599	132.102	73-32-5	6306	769	C00407	HMDB00172
535	isoleucylglycine	Peptide	Dipeptide	40008	LC/MS Pos	100003169	1740	189.123	868-28-0	342532	303621
243	isovalerylcarnitine	Amino Acid	Leucine, Isoleucine and Valine Metabolism	34407	LC/MS Pos	100001393	2504.9	246.17	31023-24-2	6426851	4932271		HMDB00688
201	kynurenine	Amino Acid	Tryptophan Metabolism	15140	LC/MS Pos	100000265	1902.1	209.092	2922-83-0	161166	141580	C00328	HMDB00684
781	lactate	Carbohydrate	Glycolysis, Gluconeogenesis, and Pyruvate Metabolism	527	LC/MS Polar	482	1468.8	89.0244	79-33-4	612	592	C00186	HMDB00190
235	leucine	Amino Acid	Leucine, Isoleucine and Valine Metabolism	60	LC/MS Polar	397	1757	130.087	61-90-5	6106	5880	C00123	HMDB00687
553	leucylglycine	Peptide	Dipeptide	40045	LC/MS Pos	100003185	1805	189.123	686-50-0	79070	71402
3194	lidocaine	Xenobiotics	Drug	35661	LC/MS Neg	100001538	5283	233.166	137-58-6	3676	3548	D00358	HMDB14426
1022	linoleate (18:2n6)	Lipid	Polyunsaturated Fatty Acid (n3 and n6)	1105	LC/MS Neg	180	5535	279.233	60-33-3	5280450	4444105	C01595	HMDB00673
1024	linolenate [alpha or gamma; (18:3n3 or 6)]	Lipid	Polyunsaturated Fatty Acid (n3 and n6)	34035	LC/MS Neg	100001337	5450	277.217		5280934	4444437	C06426	HMDB03073
72	lysine	Amino Acid	Lysine Metabolism	1301	LC/MS Pos	407	613.8	147.113	56-87-1	5962	5747	C00047	HMDB00182
572	lysylleucine	Peptide	Dipeptide	40020	LC/MS Pos	100003196	1561	260.197	7369-79-1	4682588	3870665
956	malate	Energy	TCA Cycle	1303	LC/MS Neg	409	615.6	133.014	6915-15-7	525	510	C00149	HMDB00156
832	maltose	Carbohydrate	Glycogen Metabolism	15806	GC/MS	913	2142.1	204.1	6363-53-7	10991489	388469	C00208	HMDB00163
827	maltotetraose	Carbohydrate	Glycogen Metabolism	15910	LC/MS Neg	100000275	910	665.215	34612-38-9	446495	393830	C02052	HMDB01296
829	maltotriose	Carbohydrate	Glycogen Metabolism	44688	LC/MS Neg	100000276	812	503.162	1109-28-0	439586	388669	C01835	HMDB01262
986	margarate (17:0)	Lipid	Long Chain Fatty Acid	1121	LC/MS Neg	891	5731	269.249	506-12-7	10465	10033		HMDB02259
1033	mead acid (20:3n9)	Lipid	Polyunsaturated Fatty Acid (n3 and n6)	35174	LC/MS Neg	100001472	5650	305.249	20590-32-3	5312531	4471956		HMDB10378
287	methionine	Amino Acid	Methionine, Cysteine, SAM and Taurine Metabolism	1302	LC/MS Polar	415	1871.8	148.044	63-68-3	6137	5907	C00073	HMDB00696
292	methionine sulfoxide	Amino Acid	Methionine, Cysteine, SAM and Taurine Metabolism	18374	LC/MS Pos	100000039	741.1	166.053	3226-65-1	158980	139840	C02989	HMDB02005
2635	methyl-4-hydroxybenzoate	Xenobiotics	Benzoate Metabolism	34386	LC/MS Polar	100001252	780	151.04	99-76-3	7456	7176	D01400	HMDB32572
2656	methyl-4-hydroxybenzoate sulfate	Xenobiotics	Benzoate Metabolism	48429	LC/MS Neg	100006116	2873	230.997
256	methylsuccinate	Amino Acid	Leucine, Isoleucine and Valine Metabolism	15745	LC/MS Polar	2051	2800	131.035	498-21-5	10349	9922		HMDB01844
1356	myo-inositol	Lipid	Inositol Metabolism	1124	LC/MS Polar	363	3506.3	225.062	87-89-8	892	10239179	C00137	HMDB00211
980	myristate (14:0)	Lipid	Long Chain Fatty Acid	1365	LC/MS Neg	519	5440	227.202	544-63-8	11005	10539	C06424	HMDB00806
981	myristoleate (14:1n5)	Lipid	Long Chain Fatty Acid	32418	LC/MS Neg	100001198	5346.9	225.186	544-64-9	5281119	4444564	C08322	HMDB02000
1581	myristoyl sphingomyelin*	Lipid	Sphingolipid Metabolism	42463	LC/MS Polar	100004328	873	719.534		11433862	9608732
31	N-acetylaspartate (NAA)	Amino Acid	Alanine and Aspartate Metabolism	22185	LC/MS Polar	100000787	3143	174.041	997-55-7;997-55-7	65065	58576	C01042	HMDB00812
920	N-acetylglucosamine 6-phosphate	Carbohydrate	Aminosugar Metabolism	15107	LC/MS Neg	1213	616.7	300.049	102029-88-9	439219	8216065	C00357	HMDB02817
288	N-acetylmethionine	Amino Acid	Methionine, Cysteine, SAM and Taurine Metabolism	1589	LC/MS Neg	1083	1787	190.054	65-82-7	448580	395338	C02712	HMDB11745
927	N-acetylneuraminate	Carbohydrate	Aminosugar Metabolism	32377	LC/MS Pos	1162	796.9	310.113	131-48-6	439197	10292217	C00270	HMDB00230
365	N-acetylputrescine	Amino Acid	Polyamine Metabolism	37496	LC/MS Pos	192	840	131.118	18233-70-0	122356	109095	C02714	HMDB02064
10	N-acetylserine	Amino Acid	Glycine, Serine and Threonine Metabolism	37076	LC/MS Pos	100001851	1021	148.06	97-14-3	65249	58744		HMDB02931
336	N-delta-acetylornithine	Amino Acid	Urea cycle; Arginine and Proline Metabolism	43249	LC/MS Neg	100004523	858	173.093		9920500	8096135
3215	N-ethylglycinexylidide	Xenobiotics	Drug	46092	LC/MS Neg	100001539	4383	205.135	7728-40-7	24415	22824	C16561	HMDB60656
289	N-formylmethionine	Amino Acid	Methionine, Cysteine, SAM and Taurine Metabolism	2829	LC/MS Neg	194	1543.8	176.039	4289-98-9	439750	388809	C03145	HMDB01015
186	N-formylphenylalanine	Amino Acid	Phenylalanine and Tyrosine Metabolism	48433	LC/MS Neg	100006056	2336	192.067	13200-85-6	759256	663938
340	N-methylproline	Amino Acid	Urea cycle; Arginine and Proline Metabolism	37431	LC/MS Pos	100001956	831	130.086	475-11-6	557	541
2514	N1-Methyl-2-pyridone-5-carboxamide	Cofactors and Vitamins	Nicotinate and Nicotinamide Metabolism	40469	LC/MS Pos	100001468	1688	153.066	701-44-0	69698	62899	C05842	HMDB04193
1583	nervonoyl sphingomyelin*	Lipid	Sphingolipid Metabolism	47153	LC/MS Polar	100005986	850	857.675	94359-13-4		24846874
2495	nicotinamide	Cofactors and Vitamins	Nicotinate and Nicotinamide Metabolism	594	LC/MS Pos	432	1271.1	123.055	98-92-0	936	911	C00153	HMDB01406
2499	nicotinamide adenine dinucleotide (NAD+)	Cofactors and Vitamins	Nicotinate and Nicotinamide Metabolism	5278	LC/MS Neg	1310	1434	662.102	53-84-9	5893	5681	C00003	HMDB00902
2497	nicotinamide ribonucleotide (NMN)	Cofactors and Vitamins	Nicotinate and Nicotinamide Metabolism	22152	LC/MS Pos	1312	893.2	335.064	1094-61-7	14180	13553	C00455	HMDB00229
996	nonadecanoate (19:0)	Lipid	Long Chain Fatty Acid	1356	LC/MS Neg	892	6068	297.28	646-30-0	12591	12071	C16535	HMDB00772
3149	O-desmethylvenlafaxine	Xenobiotics	Drug	43334	LC/MS Pos	100004173	3088	264.196	300827-87-6
1199	octanoylcarnitine	Lipid	Fatty Acid Metabolism(Acyl Carnitine)	33936	LC/MS Pos	100001247	4090	288.217	3671-77-0	123701	110274	C02838	HMDB00791
990	oleate (18:1n9)	Lipid	Long Chain Fatty Acid	1359	GC/MS	442	1984.4	339.2	112-80-1	445639	393217	C00712	HMDB00207
1341	oleic ethanolamide	Lipid	Endocannabinoid	38102	LC/MS Neg	1137	6900	324.291	11-58-0;111-58-0	5283454	4446574		HMDB02088
1567	oleoyl sphingomyelin	Lipid	Sphingolipid Metabolism	37529	LC/MS Polar	100002106	865	773.581	108392-10-5	6443882	4947837
1507	oleoyl-linoleoyl-glycerophosphocholine (1)*	Lipid	Lysolipid	48270	LC/MS Polar	100006165	777	828.576
1508	oleoyl-linoleoyl-glycerophosphocholine (2)*	Lipid	Lysolipid	48390	LC/MS Polar	100006166	860	828.576
382	ophthalmate	Amino Acid	Glutathione Metabolism	34592	LC/MS Pos	100001311	1462	290.135	495-27-2	7018721	7993181		HMDB05765
323	ornithine	Amino Acid	Urea cycle; Arginine and Proline Metabolism	1493	LC/MS Pos	444	614	133.097	3184-13-2	6262	6026	C00077	HMDB03374
127	p-cresol sulfate	Amino Acid	Phenylalanine and Tyrosine Metabolism	36103	LC/MS Polar	100001315	717	187.007	3233-57-7	4615423	3806480	C01468	HMDB11635
983	palmitate (16:0)	Lipid	Long Chain Fatty Acid	1336	LC/MS Neg	424	5618	255.233	57-10-3	985	960	C00249	HMDB00220
984	palmitoleate (16:1n7)	Lipid	Long Chain Fatty Acid	33447	LC/MS Neg	452	5475	253.217	373-49-9	445638	393216	C08362	HMDB03229
1584	palmitoleoyl sphingomyelin*	Lipid	Sphingolipid Metabolism	42459	LC/MS Polar	100004329	866	745.55
1565	palmitoyl sphingomyelin	Lipid	Sphingolipid Metabolism	37506	LC/MS Polar	100002107	870	747.566	6254-89-3	9939941	8115562
1497	palmitoyl-arachidonoyl-glycerophosphocholine (1)*	Lipid	Lysolipid	48383	LC/MS Polar	100006132	870	826.56
1498	palmitoyl-arachidonoyl-glycerophosphocholine (2)*	Lipid	Lysolipid	48392	LC/MS Polar	100006157	790	826.56
1499	palmitoyl-linoleoyl-glycerophosphocholine (1)*	Lipid	Lysolipid	48385	LC/MS Polar	100006133	870	802.56
1500	palmitoyl-linoleoyl-glycerophosphocholine (2)*	Lipid	Lysolipid	48269	LC/MS Polar	100006134	783	802.56
1502	palmitoyl-oleoyl-glycerophosphocholine (1)*	Lipid	Lysolipid	48267	LC/MS Polar	100006142	853	804.576
1510	palmitoyl-palmitoyl-glycerophosphocholine (1)*	Lipid	Lysolipid	48276	LC/MS Polar	100006160	854	778.56
1511	palmitoyl-palmitoyl-glycerophosphocholine (2)*	Lipid	Lysolipid	48389	LC/MS Polar	100006161	790	778.56
1207	palmitoylcarnitine	Lipid	Fatty Acid Metabolism(Acyl Carnitine)	44681	LC/MS Pos	100000776	5204	400.342	6865-14-1	461	448	C02990	HMDB00222
2520	pantothenate	Cofactors and Vitamins	Pantothenate and CoA Metabolism	1508	LC/MS Neg	1024	1498.7	218.103	137-08-6	6613	6361	C00864	HMDB00210
3228	paroxetine	Xenobiotics	Drug	40461	LC/MS Pos	100003442	4260	330.15	110429-49-8	43815	39888	D02362,C07415
982	pentadecanoate (15:0)	Lipid	Long Chain Fatty Acid	1361	LC/MS Neg	980	5521	241.217	1002-84-2;10002-84-2	13849	13249	C16537	HMDB00826
125	phenol sulfate	Amino Acid	Phenylalanine and Tyrosine Metabolism	32553	LC/MS Neg	100001510	2156	172.991	937-34-8	74426	67018	C02180	HMDB60015
109	phenylacetylglutamine	Amino Acid	Phenylalanine and Tyrosine Metabolism	35126	LC/MS Neg	100001417	2330	263.104	28047-15-6	92258	270643	C04148	HMDB06344
97	phenylalanine	Amino Acid	Phenylalanine and Tyrosine Metabolism	64	LC/MS Pos	460	2050	166.086	63-91-2	6140	5910	C00079	HMDB00159
601	phenylalanylalanine	Peptide	Dipeptide	41374	LC/MS Neg	100003589	2745	235.109	3918-87-4	6993123;5488196	4589716
605	phenylalanylglycine	Peptide	Dipeptide	41370	LC/MS Pos	100003588	2155	223.108	721-90-4	98207	88678
102	phenyllactate (PLA)	Amino Acid	Phenylalanine and Tyrosine Metabolism	22130	LC/MS Neg	100000774	2208	165.056	828-01-3	3848	3715	C05607	HMDB00779
3233	phenylpropanolamine	Xenobiotics	Drug	39584	LC/MS Pos	100002737	2126	152.107	154-41-6	26934	25082	C07911	HMDB01942
101	phenylpyruvate	Amino Acid	Phenylalanine and Tyrosine Metabolism	566	LC/MS Neg	241	2517.6	163.04	156-06-9	997	972	C00166	HMDB00205
968	phosphate	Energy	Oxidative Phosphorylation	42109	LC/MS Neg	461	608	96.9696	7664-38-2	1061	1032	C00009	HMDB01429
779	phosphoenolpyruvate (PEP)	Carbohydrate	Glycolysis, Gluconeogenesis, and Pyruvate Metabolism	597	LC/MS Neg	463	587.3	166.975	10526-80-4	1005	980	C00074	HMDB00263
1390	phosphoethanolamine	Lipid	Phospholipid Metabolism	1600	LC/MS Neg	1026	638	140.012	1071-23-4	1015	990	C00346	HMDB00224
2940	piperine	Xenobiotics	Food Component/Plant	33935	LC/MS Pos	100001267	5135	286.144	94-62-2	638024	553590	C03882	HMDB29377
324	proline	Amino Acid	Urea cycle; Arginine and Proline Metabolism	1898	LC/MS Pos	480	805	116.071	147-85-3	145742	128566	C00148	HMDB00162
1181	propionylcarnitine	Lipid	Fatty Acid Metabolism (also BCAA Metabolism)	32452	LC/MS Pos	100001162	1590	218.139	17298-37-2	107738	96904	C03017	HMDB00824
2446	pseudouridine	Nucleotide	Pyrimidine Metabolism, Uracil containing	33442	LC/MS Neg	821	1100	243.062	1445-07-4	15047	21403010	C02067	HMDB00767
359	putrescine	Amino Acid	Polyamine Metabolism	1408	LC/MS Pos	49	564	89.1073	110-60-1	1045	13837702	C00134	HMDB01414
48	pyroglutamine*	Amino Acid	Glutamate Metabolism	46225	LC/MS Pos	100001540	750	129.066	2353-44-8	134508	118562
2950	quinate	Xenobiotics	Food Component/Plant	18335	LC/MS Polar	100000442	2432.9	191.056	77-95-2	6508	10246715	C00296	HMDB03072
295	S-adenosylhomocysteine (SAH)	Amino Acid	Methionine, Cysteine, SAM and Taurine Metabolism	42382	LC/MS Pos	197	1495.9	193.068	979-92-0	439155	16788012	C00021	HMDB00939
3250	salicylate	Xenobiotics	Drug	1515	LC/MS Neg	501	2195	137.024	69-72-7	338	331	C00805	HMDB01895
3080	salicyluric glucuronide*	Xenobiotics	Drug	33384	LC/MS Neg	100001332	1463	370.078			21403117
1359	scyllo-inositol	Lipid	Inositol Metabolism	32379	GC/MS	100001215	1893.8	318.2	488-59-5	892	10254646	C06153	HMDB06088
792	sedoheptulose-7-phosphate	Carbohydrate	Pentose Phosphate Pathway	35649	LC/MS Neg	100001628	599.6	289.033	2646-35-7	616	596	C05382	HMDB01068
9	serine	Amino Acid	Glycine, Serine and Threonine Metabolism	1648	LC/MS Polar	503	2988	104.035	56-45-1	5951	5736	C00065	HMDB00187
2965	solanidine	Xenobiotics	Food Component/Plant	39788	LC/MS Pos	100002773	4284	398.342	80-78-4	65727	59150	C06543	HMDB03236
361	spermidine	Amino Acid	Polyamine Metabolism	485	LC/MS Pos	50	533.5	146.165	124-20-9	1102	1071	C00315	HMDB01257
1571	sphingosine	Lipid	Sphingolipid Metabolism	17747	LC/MS Pos	297	5179.9	300.29	123-78-4	5353955	4510275	C00319	HMDB00252
2971	stachydrine	Xenobiotics	Food Component/Plant	34384	LC/MS Pos	100001296	838.7	144.102	4136-37-2	115244	103115	C10172	HMDB04827
988	stearate (18:0)	Lipid	Long Chain Fatty Acid	1358	LC/MS Neg	439	5872	283.264	57-11-4	5281	5091	C01530	HMDB00827
1015	stearidonate (18:4n3)	Lipid	Polyunsaturated Fatty Acid (n3 and n6)	33969	LC/MS Neg	100001229	5395	275.202	111174-40-4	5312508	4471933	C16300	HMDB06547
1345	stearoyl ethanolamide	Lipid	Endocannabinoid	38625	LC/MS Pos	100002254	5956.9	328.321	111-57-9	27902	25958		HMDB13078
1504	stearoyl-arachidonoyl-glycerophosphocholine (1)*	Lipid	Lysolipid	48386	LC/MS Polar	100006135	869	854.591
1515	stearoyl-arachidonoyl-glycerophosphoethanolamine (1)*	Lipid	Lysolipid	48497	LC/MS Polar	100006316	750	766.539
1506	stearoyl-arachidonoyl-glycerophosphoinositol (1)*	Lipid	Lysolipid	48282	LC/MS Polar	100006136	897	885.549
1523	stearoyl-arachidonoyl-glycerophosphoinositol (2)*	Lipid	Lysolipid	48847	LC/MS Polar	100006156	850	885.549
1518	stearoyl-arachidonoyl-glycerophosphoserine (1)*	Lipid	Lysolipid	48502	LC/MS Polar	100006322	888	810.529
1517	stearoyl-linoleoyl-glycerophosphoethanolamine (1)*	Lipid	Lysolipid	48499	LC/MS Polar	100006320	750	742.539
1516	stearoyl-oleoyl-glycerophosphoserine (1)*	Lipid	Lysolipid	48494	LC/MS Polar	100006312	901	788.545
1107	suberate (octanedioate)	Lipid	Fatty Acid, Dicarboxylate	15730	LC/MS Polar	100000016	2577.6	173.082	505-48-6	10457	10025	C08278	HMDB00893
854	sucrose	Carbohydrate	Disaccharides and Oligosaccharides	1519	LC/MS Neg	935	865	341.109	57-50-1	5988	5768	C00089	HMDB00258
3042	tartronate (hydroxymalonate)	Xenobiotics	Bacterial/Fungal	20693	LC/MS Neg	100000840	610	118.999	80-69-3	45	44	C02287	HMDB35227
314	taurine	Amino Acid	Methionine, Cysteine, SAM and Taurine Metabolism	2125	LC/MS Polar	512	2120	124.007	107-35-7	1123	1091	C00245	HMDB00251
2530	threonate	Cofactors and Vitamins	Ascorbate and Aldarate Metabolism	27738	LC/MS Polar	100001022	2384	135.03	70753-61-6	151152	133224	C01620	HMDB00943
14	threonine	Amino Acid	Glycine, Serine and Threonine Metabolism	1284	LC/MS Pos	564	701.5	120.066	72-19-5	6288	6051	C00188	HMDB00167
342	trans-4-hydroxyproline	Amino Acid	Urea cycle; Arginine and Proline Metabolism	32306	LC/MS Pos	1001	685	132.066	51-35-4	5810	5605	C01157	HMDB00725
59	trans-urocanate	Amino Acid	Histidine Metabolism	607	LC/MS Neg	537	777.7	137.036	104-98-3	736715	643824	C00785	HMDB00301
2512	trigonelline (N'-methylnicotinate)	Cofactors and Vitamins	Nicotinate and Nicotinamide Metabolism	32401	LC/MS Pos	100001092	771.8	138.055	535-83-1	5570	5369	C01004	HMDB00875
191	tryptophan	Amino Acid	Tryptophan Metabolism	54	LC/MS Pos	565	2440	205.097	73-22-3	6305	6066	C00078	HMDB00929
225	tryptophan betaine	Amino Acid	Tryptophan Metabolism	37097	LC/MS Pos	100001743	2466	247.144	20671-76-5	442106	390633	C09213	HMDB61115
671	tryptophylglycine	Peptide	Dipeptide	43028	LC/MS Neg	100003609	2481	260.104	7360-09-0	263471	231453
110	tyrosine	Amino Acid	Phenylalanine and Tyrosine Metabolism	1299	LC/MS Neg	815	1322	180.067	60-18-4	6057	5833	C00082	HMDB00158
895	UDP-glucose	Carbohydrate	Nucleotide Sugar	32344	LC/MS Polar	1096	3950	565.048	117756-22-6	8629	8308	C00029	HMDB00286
900	UDP-glucuronate	Carbohydrate	Nucleotide Sugar	2763	LC/MS Neg	1097	588	579.027	28053-08-9;63700-19-6	17473	16522	C00167	HMDB00935
904	UDP-N-acetylglucosamine	Carbohydrate	Nucleotide Sugar	35162	LC/MS Polar	1249	3708.7	606.074	91183-98-1	445675	17215931	C00043	HMDB00290
2445	uracil	Nucleotide	Pyrimidine Metabolism, Uracil containing	605	LC/MS Neg	825	1086	111.02	66-22-8	1174	1141	C00106	HMDB00300
2366	urate	Nucleotide	Purine Metabolism, (Hypo)Xanthine/Inosine containing	1604	LC/MS Neg	1134	757.1	167.021	69-93-2;120K5305	1175		C00366	HMDB00289
2444	uridine	Nucleotide	Pyrimidine Metabolism, Uracil containing	606	LC/MS Polar	535	1431	289.068	58-96-8	6029	5807	C00299	HMDB00296
2438	uridine 5'-diphosphate (UDP)	Nucleotide	Pyrimidine Metabolism, Uracil containing	5345	LC/MS Neg	870	599.5	402.995	21931-53-3	6031	5809	C00015	HMDB00295
2440	uridine monophosphate (5' or 3')	Nucleotide	Pyrimidine Metabolism, Uracil containing	39892	LC/MS Neg	100003366	627	323.029	58-97-9	6030			HMDB00288
1186	valerylglycine	Lipid	Fatty Acid Metabolism(Acyl Glycine)	36768	LC/MS Neg	100001451	2071	158.082	24003-66-5	4737557	3924818		HMDB00927
276	valine	Amino Acid	Leucine, Isoleucine and Valine Metabolism	1649	LC/MS Pos	566	1042.1	118.086	72-18-4	6287	6050	C00183	HMDB00883
701	valylglycine	Peptide	Dipeptide	40475	LC/MS Neg	100003641	1506	173.093	686-43-1	136487	120256
704	valylleucine	Peptide	Dipeptide	39994	LC/MS Neg	100003210	3335	229.156	22906-55-4	352039	312586
3268	venlafaxine	Xenobiotics	Drug	38623	LC/MS Pos	100002807	3677	278.211	93413-69-5	5656	5454	C07187	HMDB05016
2359	xanthine	Nucleotide	Purine Metabolism, (Hypo)Xanthine/Inosine containing	3147	LC/MS Polar	1004	2023	151.026	69-89-6	1188	1151	C00385	HMDB00292
* indicates compounds that have not been officially confirmed based on a standard but we are confident in its identity

## Sheet: Supplementary_table_S3
Supplementary Table S3: Muscle tissue metabolites identification data
PATHWAY_SORTORDER	BIOCHEMICAL	SUPER_PATHWAY	SUB_PATHWAY	COMP_ID	PLATFORM	CHEMICAL_ID	RI	MASS	CAS	PUBCHEM	CHEMSPIDER	KEGG	Group HMDB_ID
3452	1,2,3-benzenetriol sulfate (2)	Xenobiotics	Chemical	48762	LC/MS Neg	100006374	1709	204.981
761	1,5-anhydroglucitol (1,5-AG)	Carbohydrate	Glycolysis, Gluconeogenesis, and Pyruvate Metabolism	20675	LC/MS Neg	100000580	802	163.061	154-58-5	64960		C07326	HMDB02712
2666	1,7-dimethylurate	Xenobiotics	Xanthine Metabolism	34400	LC/MS Neg	100001399	1578.6	195.052	33868-03-0	91611	82720	C16356	HMDB11103
1423	1-arachidonoylglycerophosphocholine (20:4n6)*	Lipid	Lysolipid	34061	LC/MS Neg	100001551	6074	618.341			21403155	C05208	HMDB10395
1452	1-arachidonoylglycerophosphoethanolamine*	Lipid	Lysolipid	35186	LC/MS Neg	100001571	5874	500.278		42607465	21403171		HMDB11517
1473	1-arachidonoylglycerophosphoinositol*	Lipid	Lysolipid	34214	LC/MS Neg	100001654	5482	619.289					HMDB61690
1545	1-arachidonylglycerol	Lipid	Monoacylglycerol	34397	LC/MS Neg	100001433	6450	303.233	35474-99-8	5282281	4445452	C13857	HMDB11572
1542	1-linoleoylglycerol (1-monolinolein)	Lipid	Monoacylglycerol	27447	LC/MS Neg	100001040	6477	279.233	2277-28-3	5283469	4446589
1411	1-linoleoylglycerophosphocholine (18:2n6)	Lipid	Lysolipid	34419	LC/MS Neg	100001395	6160	594.341		11988421	10160888	C04100	HMDB10386
1448	1-linoleoylglycerophosphoethanolamine*	Lipid	Lysolipid	32635	LC/MS Neg	100001570	5900	476.278		52925130	21403170		HMDB11507
54	1-methylhistidine	Amino Acid	Histidine Metabolism	30460	LC/MS Neg	100001051	1227	168.078	332-80-9	92105	83153	C01152	HMDB00001
2663	1-methylurate	Xenobiotics	Xanthine Metabolism	34395	LC/MS Neg	100001400	1099	181.037	708-79-2	69726	62926	C16359	HMDB03099
2669	1-methylxanthine	Xenobiotics	Xanthine Metabolism	34389	LC/MS Neg	100001405	1568.8	165.042	6136-37-4	80220	72464	C16358	HMDB10738
1531	1-myristoylglycerol (1-monomyristin)	Lipid	Monoacylglycerol	35625	LC/MS Neg	100001618	6353.3	227.202	75685-84-6	79050	71382	C01885	HMDB11561
1540	1-oleoylglycerol (1-monoolein)	Lipid	Monoacylglycerol	21184	LC/MS Neg	100000924	6794	281.249	111-03-5	5283468	4446588		HMDB11567
1408	1-oleoylglycerophosphocholine (18:1)	Lipid	Lysolipid	48258	LC/MS Neg	100001272	6250	596.357	19420-56-5	16081932	17240641		HMDB02815
1444	1-oleoylglycerophosphoethanolamine	Lipid	Lysolipid	35628	LC/MS Neg	100001569	6125.1	478.294	89576-29-4	9547071	7826021		HMDB11506
1491	1-oleoylglycerophosphoglycerol*	Lipid	Lysolipid	45968	LC/MS Neg	100005716	5610	509.288
1436	1-oleoylplasmenylethanolamine*	Lipid	Lysolipid	44621	LC/MS Neg	100005372	6250	462.299
1481	1-palmitoylglycerophosphate	Lipid	Lysolipid	34428	LC/MS Neg	100001445	5900	409.236	17618-08-5	6419701	4925335	C04036	HMDB00327
1400	1-palmitoylglycerophosphocholine (16:0)	Lipid	Lysolipid	33955	LC/MS Pos	100001263	5670	496.34	17364-16-8	86554	78064		HMDB10382
1439	1-palmitoylglycerophosphoethanolamine	Lipid	Lysolipid	35631	LC/MS Neg	100001567	6057.2	452.278		9547069	7826019		HMDB11503
1486	1-palmitoylglycerophosphoglycerol*	Lipid	Lysolipid	45970	LC/MS Neg	100005717	5570	483.273		3300276	2548639
1434	1-palmitoylplasmenylethanolamine*	Lipid	Lysolipid	39270	LC/MS Neg	100003000	6285	436.283			10471193
1406	1-stearoylglycerophosphocholine (18:0)	Lipid	Lysolipid	33961	LC/MS Neg	100001271	6870	598.373	19420-57-6	497299	435389		HMDB10384
1442	1-stearoylglycerophosphoethanolamine	Lipid	Lysolipid	42398	LC/MS Neg	100001461	6514	480.31	69747-55-3	9547068	7826018		HMDB11130
1465	1-stearoylglycerophosphoinositol	Lipid	Lysolipid	19324	LC/MS Neg	100000656	5794.3	599.32	796963-93-4		21403067		HMDB61696
1475	1-stearoylglycerophosphoserine*	Lipid	Lysolipid	45966	LC/MS Neg	100004327	5800	524.299		9547101	7826051
1435	1-stearoylplasmenylethanolamine*	Lipid	Lysolipid	39271	LC/MS Neg	100003001	6500	464.315
987	10-heptadecenoate (17:1n7)	Lipid	Long Chain Fatty Acid	33971	LC/MS Neg	100001278	5555	267.233	29743-97-3	5312435	4471860		HMDB60038
997	10-nonadecenoate (19:1n9)	Lipid	Long Chain Fatty Acid	33972	LC/MS Neg	100001277	5780	295.264	73033-09-7	5312513	4471938		HMDB13622
2770	2,3-dihydroxyisovalerate	Xenobiotics	Food Component/Plant	38276	LC/MS Polar	100002417	1050	133.051	1756-18-9	677	657	C04039	HMDB12141
78	2-aminoadipate	Amino Acid	Lysine Metabolism	6146	LC/MS Polar	381	3500	160.062	542-32-5;1118-90-7	469	456	C00956	HMDB00510
302	2-aminobutyrate	Amino Acid	Methionine, Cysteine, SAM and Taurine Metabolism	1577	GC/MS	1128	1215.7	130	1492-24-6	439691	388757	C02261	HMDB00650
1151	2-aminoheptanoate	Lipid	Fatty Acid, Amino	43761	LC/MS Pos	100004542	2530	146.118	1115-90-8	227939	198338
1156	2-aminooctanoate	Lipid	Fatty Acid, Amino	43343	LC/MS Pos	100004227	3355	160.133	644-90-6	69522	62727		HMDB00991
3356	2-aminophenol sulfate	Xenobiotics	Chemical	43266	LC/MS Neg	100004322	1677	188.002		181670	158022		HMDB61116
1546	2-arachidonoyl glycerol	Lipid	Monoacylglycerol	19266	LC/MS Neg	100000584	6170	303.233	53847-30-6	5282280	4445451	C13856	HMDB04666
3373	2-ethylhexanoate	Xenobiotics	Chemical	1554	LC/MS Neg	1121	3895.4	143.108	123-66-0;149-57-5	8697	8373		HMDB31230
273	2-hydroxy-3-methylvalerate	Amino Acid	Leucine, Isoleucine and Valine Metabolism	36746	LC/MS Neg	100001541	1800	131.071	488-15-3	164623	144317		HMDB00317
3072	2-hydroxyacetaminophen sulfate*	Xenobiotics	Drug	33173	LC/MS Neg	100001791	1674	246.008
303	2-hydroxybutyrate (AHB)	Amino Acid	Methionine, Cysteine, SAM and Taurine Metabolism	21044	GC/MS	100000933	1169.4	131	3347-90-8	440864	389701	C05984	HMDB00008
1098	2-hydroxyglutarate	Lipid	Fatty Acid, Dicarboxylate	37253	GC/MS	100002070	1576	247	40951-21-1	43	42	C02630	HMDB00606
1223	2-hydroxyoctanoate	Lipid	Fatty Acid, Monohydroxy	22036	LC/MS Neg	100000743	3736.8	159.103	617-73-2	94180	84994		HMDB02264
1543	2-linoleoylglycerol (2-monolinolein)	Lipid	Monoacylglycerol	32506	LC/MS Neg	100000987	6250	279.233	3443-82-1	5365676	4517636		HMDB11538
3073	2-methoxyacetaminophen sulfate*	Xenobiotics	Drug	47031	LC/MS Neg	100001793	1949	260.023
268	2-methylbutyrylcarnitine (C5)	Amino Acid	Leucine, Isoleucine and Valine Metabolism	45095	LC/MS Pos	100001509	2465	246.17	31023-25-3	6426901	4932320		HMDB00378
963	2-methylcitrate	Energy	TCA Cycle	37483	LC/MS Neg	90	575	205.035	6061-96-7	439681	4573953	C02225	HMDB00379
1166	2-methylmalonyl carnitine	Lipid	Fatty Acid Synthesis	35482	LC/MS Pos	100001596	1552.7	262.129	149181-64-6	53481628	21403178		HMDB13133
1541	2-oleoylglycerol (2-monoolein)	Lipid	Monoacylglycerol	21232	LC/MS Neg	100000943	6950	281.249	3443-84-3	5319879	4478086
1401	2-palmitoylglycerophosphocholine*	Lipid	Lysolipid	35253	LC/MS Neg	100001562	6215	570.341		15061532	21403165		HMDB61702
777	2-phosphoglycerate	Carbohydrate	Glycolysis, Gluconeogenesis, and Pyruvate Metabolism	35629	GC/MS	100000093	1734	459.1	70195-25-4	59	13766841	C00631	HMDB03391
1443	2-stearoylglycerophosphoethanolamine*	Lipid	Lysolipid	41220	LC/MS Neg	100003901	6350	480.31			24769218
120	3-(4-hydroxyphenyl)lactate	Amino Acid	Phenylalanine and Tyrosine Metabolism	32197	LC/MS Neg	240	1379	181.051	6482-98-0	9378	9010	C03672	HMDB00755
3074	3-(cystein-S-yl)acetaminophen*	Xenobiotics	Drug	34365	LC/MS Pos	100001797	1963	271.075		5233914	4403253
3075	3-(N-acetyl-L-cystein-S-yl) acetaminophen	Xenobiotics	Drug	45721	LC/MS Neg	2048	2094	311.071	52372-86-8	83967	75765
1120	3-carboxy-4-methyl-5-propyl-2-furanpropanoate (CMPF)	Lipid	Fatty Acid, Dicarboxylate	31787	LC/MS Neg	100001178	2840	239.092	86879-39-2	123979	110498		HMDB61112
274	3-hydroxy-2-ethylpropionate	Amino Acid	Leucine, Isoleucine and Valine Metabolism	32397	LC/MS Neg	100001170	975	117.056	4374-62-3	188979	164207		HMDB00396
1219	3-hydroxybutyrate (BHBA)	Lipid	Ketone Bodies	542	LC/MS Polar	254	1443.3	103.04	625-72-9	441	428	C01089	HMDB00357
2602	3-hydroxyhippurate	Xenobiotics	Benzoate Metabolism	39600	LC/MS Neg	100002122	1687	194.046	1637-75-8	450268	396603		HMDB06116
2787	3-hydroxyindolin-2-one	Xenobiotics	Food Component/Plant	42561	LC/MS Neg	100003823	2695	148.04	61-71-2	6097	5872	C11130
282	3-hydroxyisobutyrate	Amino Acid	Leucine, Isoleucine and Valine Metabolism	1549	LC/MS Polar	111	1619.1	103.04	2068-83-9	87	10140307	C06001	HMDB00336
1230	3-hydroxyoctanoate	Lipid	Fatty Acid, Monohydroxy	22001	LC/MS Neg	100000773	3446	159.103	88930-08-9	26613	24791		HMDB01954
3332	3-hydroxypyridine	Xenobiotics	Chemical	21169	LC/MS Pos	100000905	841	96.0444	109-00-2	7971	7683
3454	3-hydroxypyridine sulfate	Xenobiotics	Chemical	48448	LC/MS Neg	100006098	1595.5	173.987	1955-23-3		16232314
200	3-indoxyl sulfate	Amino Acid	Tryptophan Metabolism	27672	LC/MS Neg	100000467	2222.2	212.002	2642-37-7	10258	9840		HMDB00682
1561	3-ketosphinganine	Lipid	Sphingolipid Metabolism	34381	LC/MS Neg	100001436	6250	342.265	18944-28-0	631	611	C02934	HMDB01480
140	3-methoxytyrosine	Amino Acid	Phenylalanine and Tyrosine Metabolism	12017	LC/MS Pos	1342	1771	212.092	300-48-1	1670	8948		HMDB01434
2629	3-methyl catechol sulfate (1)	Xenobiotics	Benzoate Metabolism	46165	LC/MS Neg	100004112	2790	203.002
279	3-methyl-2-oxobutyrate	Amino Acid	Leucine, Isoleucine and Valine Metabolism	44526	LC/MS Polar	100000936	911	115.04	3715-29-5	49	48	C00141	HMDB00019
267	3-methyl-2-oxovalerate	Amino Acid	Leucine, Isoleucine and Valine Metabolism	15676	LC/MS Neg	100000036	2064.2	129.056	1460-34-0;51829-07-3	47	46	C00671	HMDB03736
83	3-methylglutarylcarnitine (1)	Amino Acid	Lysine Metabolism	46547	LC/MS Pos	100005849	1870	290.16		128145	113619		HMDB00552
84	3-methylglutarylcarnitine (2)	Amino Acid	Lysine Metabolism	46548	LC/MS Pos	100005850	1960	290.16		128145	113619		HMDB00552
55	3-methylhistidine	Amino Acid	Histidine Metabolism	15677	LC/MS Neg	100000042	906.3	168.078	368-16-1	64969	58494	C01152	HMDB00479
2670	3-methylxanthine	Xenobiotics	Xanthine Metabolism	32445	LC/MS Neg	100001108	1700	165.042	1076-22-8	70639	63805	C16357	HMDB01886
172	3-phenylpropionate (hydrocinnamate)	Amino Acid	Phenylalanine and Tyrosine Metabolism	15749	LC/MS Neg	100000010	2860	149.061	501-52-0	107	10181339	C05629	HMDB00764
778	3-phosphoglycerate	Carbohydrate	Glycolysis, Gluconeogenesis, and Pyruvate Metabolism	1414	LC/MS Neg	132	583	184.986	80731-10-8	724	10669764	C00597	HMDB00807
366	4-acetamidobutanoate	Amino Acid	Polyamine Metabolism	1558	LC/MS Pos	1113	1721.3	146.081	3025-96-5	18189	17180	C02946	HMDB03681
3077	4-acetamidophenol	Xenobiotics	Drug	12032	LC/MS Pos	1383	2208.2	152.071	103-90-2	1983	1906	C06804	HMDB01859
3078	4-acetamidophenylglucuronide	Xenobiotics	Drug	15736	LC/MS Neg	100000043	1400	326.088	120595-80-4	83944	3239926		HMDB10316
3076	4-acetaminophen sulfate	Xenobiotics	Drug	37475	LC/MS Neg	2049	1792	230.013	10066-90-7;32113-41-0	83939	75741	C06804	HMDB59911
1710	4-androsten-3beta,17beta-diol disulfate (1)	Lipid	Steroid	37202	LC/MS Neg	100001992	3740	224.062		10634		C04295	HMDB03818
371	4-guanidinobutanoate	Amino Acid	Guanidino and Acetamido Metabolism	15681	LC/MS Pos	100000096	1150	146.092	463-003;463-00-3	500	486	C01035	HMDB03464
385	4-hydroxy-nonenal-glutathione	Amino Acid	Glutathione Metabolism	48504	LC/MS Neg	100006240	3387.5	462.192	99927-70-5
2618	4-hydroxybenzoate	Xenobiotics	Benzoate Metabolism	21133	LC/MS Neg	100000862	820	137.024	99-96-7	135	132	C00156	HMDB00500
2603	4-hydroxyhippurate	Xenobiotics	Benzoate Metabolism	35527	LC/MS Neg	100001423	1475	194.046	2482-25-9	151012	133104		HMDB13678
119	4-hydroxyphenylpyruvate	Amino Acid	Phenylalanine and Tyrosine Metabolism	1669	LC/MS Neg	1141	1690.1	179.035	156-39-8	979	954	C01179	HMDB00707
238	4-methyl-2-oxopentanoate	Amino Acid	Leucine, Isoleucine and Valine Metabolism	22116	LC/MS Neg	100000551	2170	129.056	816-66-0	70	69	C00233	HMDB00695
2631	4-methylcatechol sulfate	Xenobiotics	Benzoate Metabolism	46146	LC/MS Neg	100004111	2665	203.002
2642	4-vinylphenol sulfate	Xenobiotics	Benzoate Metabolism	36098	LC/MS Neg	100001755	3320	199.007	2628-17-3	6426766	4932200	C05627	HMDB04072
362	5-methylthioadenosine (MTA)	Amino Acid	Polyamine Metabolism	1419	LC/MS Pos	212	2444.9	298.097	2457-80-9	439176	388321	C00170	HMDB01173
2447	5-methyluridine (ribothymidine)	Nucleotide	Pyrimidine Metabolism, Uracil containing	35136	LC/MS Neg	100001446	1778.1	257.078	1463-10-1	445408	393058		HMDB00884
381	5-oxoproline	Amino Acid	Glutathione Metabolism	1494	LC/MS Neg	1021	738.5	128.035	98-79-3	7405	7127	C01879	HMDB00267
3104	6-oxopiperidine-2-carboxylic acid	Xenobiotics	Drug	43231	LC/MS Pos	100004499	1826.6	144.066	34622-39-4	3014237	2282737
787	6-phosphogluconate	Carbohydrate	Pentose Phosphate Pathway	15442	LC/MS Neg	100000341	583.9	275.017	921-62-0;53411-70-4	91493	82615	C00345	HMDB01316
1613	7-alpha-hydroxy-3-oxo-4-cholestenoate (7-Hoca)	Lipid	Sterol	36776	LC/MS Neg	100001609	5288.1	429.301	115538-85-7	3081085	2338765	C17337	HMDB12458
2415	7-methylguanine	Nucleotide	Purine Metabolism, Guanine containing	35114	LC/MS Neg	100001456	1729.7	164.058	578-76-7	11361	10883	C02242	HMDB00897
2671	7-methylxanthine	Xenobiotics	Xanthine Metabolism	34390	LC/MS Pos	100001396	1813.9	167.056	552-62-5	68374	61660	C16353	HMDB01991
1195	acetylcarnitine	Lipid	Fatty Acid Metabolism(Acyl Carnitine)	32198	LC/MS Pos	100000802	1166.9	204.123	5080-50-2	1	5406074	C02571	HMDB00201
966	acetylphosphate	Energy	Oxidative Phosphorylation	15488	LC/MS Polar	1211	4013.9	138.98	94249-01-1	186	181	C00227	HMDB01494
358	acisoga	Amino Acid	Polyamine Metabolism	43258	LC/MS Pos	100004541	2290	185.128	106692-36-8	129397	114601
2380	adenine	Nucleotide	Purine Metabolism, Adenine containing	554	LC/MS Pos	880	1002	136.062	73-24-5	190	185	C00147	HMDB00034
2379	adenosine	Nucleotide	Purine Metabolism, Adenine containing	555	LC/MS Pos	798	1625.3	268.104	58-61-7	60961	54923	C00212	HMDB00050
2375	adenosine 3',5'-cyclic monophosphate (cAMP)	Nucleotide	Purine Metabolism, Adenine containing	2831	LC/MS Neg	207	1952.2	328.045	60-92-4	6076	268	C00575	HMDB00058
2377	adenosine 3',5'-diphosphate	Nucleotide	Purine Metabolism, Adenine containing	15691	LC/MS Neg	1214	575	426.022	75431-54-8	159296	19951095	C00054	HMDB00061
2371	adenosine 5'-diphosphate (ADP)	Nucleotide	Purine Metabolism, Adenine containing	3108	LC/MS Neg	208	680	426.022	20398-34-9	6022	5800	C00008	HMDB01341
2515	adenosine 5'-diphosphoribose (ADP-ribose)	Cofactors and Vitamins	Nicotinate and Nicotinamide Metabolism	558	LC/MS Neg	215	920	558.064	68414-18-6	192	3674071	C00301	HMDB01178
2372	adenosine 5'-monophosphate (AMP)	Nucleotide	Purine Metabolism, Adenine containing	32342	LC/MS Pos	209	1208	348.07	149022-20-8	6083	10239183	C00020	HMDB00045
2378	adenylosuccinate	Nucleotide	Purine Metabolism, Adenine containing	18360	LC/MS Neg	1303	560	230.53	19046-78-7	195	190	C03794	HMDB00536
24	alanine	Amino Acid	Alanine and Aspartate Metabolism	1126	LC/MS Pos	811	696	90.055	56-41-7	5950	5735	C00041	HMDB00161
419	alanylleucine	Peptide	Dipeptide	37093	LC/MS Pos	100001890	2165	203.139	1638-60-4	259583	227831		HMDB28691
2367	allantoin	Nucleotide	Purine Metabolism, (Hypo)Xanthine/Inosine containing	1107	LC/MS Polar	1002	1672	157.037	97-59-6	204	199	C02350	HMDB00462
283	alpha-hydroxyisocaproate	Amino Acid	Leucine, Isoleucine and Valine Metabolism	22132	LC/MS Neg	100000706	1840	131.071	10303-64-7	83697	75520	C03264	HMDB00746
254	alpha-hydroxyisovalerate	Amino Acid	Leucine, Isoleucine and Valine Metabolism	33937	LC/MS Neg	100001300	1126	117.056	600-37-3	99823	90190		HMDB00407
248	alpha-hydroxyisovaleroyl carnitine*	Amino Acid	Leucine, Isoleucine and Valine Metabolism	46263	LC/MS Pos	100005836	1863	262.165
951	alpha-ketoglutarate	Energy	TCA Cycle	528	LC/MS Polar	93	2700	145.014	305-72-6;328-50-7;22202-68-2	51	50	C00026	HMDB00208
2534	alpha-tocopherol	Cofactors and Vitamins	Tocopherol Metabolism	1561	GC/MS	1105	2305.4	502.5	59-02-9;10191-41-0	14985	14265	C02477	HMDB01893
1700	androsterone sulfate	Lipid	Steroid	31591	LC/MS Neg	100001073	5022	369.174	2479-86-9	159663	19988780		HMDB02759
408	anserine	Peptide	Dipeptide Derivative	15747	LC/MS Pos	100000044	651.8	241.13	10030-52-1	112072	100482	C01262	HMDB00194
812	arabitol	Carbohydrate	Pentose Metabolism	38075	GC/MS	100000012	1687.5	307.1	7643-75-6	94154	84971	C01904	HMDB01851
2531	arabonate	Cofactors and Vitamins	Ascorbate and Aldarate Metabolism	37516	GC/MS	100001937	1736	292.1	7643-75-7	122045	108861	C00878	HMDB00539
999	arachidate (20:0)	Lipid	Long Chain Fatty Acid	1118	LC/MS Neg	893	6295	311.296	506-30-9	10467	10035	C06425	HMDB02212
1027	arachidonate (20:4n6)	Lipid	Polyunsaturated Fatty Acid (n3 and n6)	1110	LC/MS Neg	229	5535	303.233	506-32-1	444899	392692	C00219	HMDB01043
321	arginine	Amino Acid	Urea cycle; Arginine and Proline Metabolism	1638	LC/MS Pos	231	700	175.119	1119-34-2	232	227	C00062	HMDB00517
326	argininosuccinate	Amino Acid	Urea cycle; Arginine and Proline Metabolism	15497	LC/MS Neg	232	638.1	289.115	156637-58-0	16950;828	805	C03406	HMDB00052
2528	ascorbate (Vitamin C)	Cofactors and Vitamins	Ascorbate and Aldarate Metabolism	1640	GC/MS	233	1850.1	332.1	134-03-2		10189562	C00072	HMDB00044
29	asparagine	Amino Acid	Alanine and Aspartate Metabolism	512	LC/MS Polar	917	2951.1	131.046	70-47-3	6267	6031	C00152	HMDB00168
27	aspartate	Amino Acid	Alanine and Aspartate Metabolism	443	LC/MS Polar	234	3500	132.03	56-84-8	5960	5745	C00049	HMDB00191
1110	azelate (nonanedioate)	Lipid	Fatty Acid, Dicarboxylate	18362	LC/MS Neg	2029	1276	187.098	123-99-9	2266	2179	C08261	HMDB00784
2609	benzoate	Xenobiotics	Benzoate Metabolism	15778	LC/MS Neg	100000008	1750	121.029	65-85-0	243	238	C00180	HMDB01870
2461	beta-alanine	Nucleotide	Pyrimidine Metabolism, Uracil containing	55	GC/MS	244	1451.8	174	56-41-7;107-95-9	239	234	C00099	HMDB00056
246	beta-hydroxyisovalerate	Amino Acid	Leucine, Isoleucine and Valine Metabolism	12129	LC/MS Neg	1442	1027	117.056	625-08-1	69362	62571		HMDB00754
247	beta-hydroxyisovaleroylcarnitine	Amino Acid	Leucine, Isoleucine and Valine Metabolism	35433	LC/MS Pos	100001594	1701	262.165	99159-87-2		21403176
6	betaine	Amino Acid	Glycine, Serine and Threonine Metabolism	3141	LC/MS Pos	799	734	118.086	107-43-7	247	24219951173	C00719	HMDB00043
1178	butyrylcarnitine	Lipid	Fatty Acid Metabolism (also BCAA Metabolism)	32412	LC/MS Pos	100001054	1977	232.154	25576-40-3	439829	184820	C02862	HMDB02013
232	C-glycosyltryptophan	Amino Acid	Tryptophan Metabolism	48782	LC/MS Pos	100006379	1907	367.15	180509-18-6	10981970	9157171
2659	caffeine	Xenobiotics	Xanthine Metabolism	569	LC/MS Pos	849	2819	195.088	58-08-2	2519	2424	C07481	HMDB01847
970	caproate (6:0)	Lipid	Medium Chain Fatty Acid	32489	LC/MS Neg	926	2713.7	115.076	142-62-1	8892	8552	C01585	HMDB00535
972	caprylate (8:0)	Lipid	Medium Chain Fatty Acid	32492	LC/MS Neg	932	4362	143.108	124-07-2	379	370	C06423	HMDB00482
1214	carnitine	Lipid	Carnitine Metabolism	15500	LC/MS Pos	100000007	688.9	162.112	461-05-2	10917	10455	C00318	HMDB00062
405	carnosine	Peptide	Dipeptide Derivative	1768	LC/MS Neg	249	804	225.099	305-84-0	439224	388363	C00386	HMDB00033
2626	catechol sulfate	Xenobiotics	Benzoate Metabolism	35320	LC/MS Neg	100001605	1906	188.986	4918-96-1	3083879	2341024	C00090	HMDB59724
1771	chenodeoxycholate	Lipid	Primary Bile Acid Metabolism	1563	LC/MS Neg	1123	5264	391.285	474-24-9;474-25-9	10133		C02528	HMDB00518
1603	cholesterol	Lipid	Sterol	63	GC/MS	266	2316.9	329.3	57-88-5	11025495	4937803	C00187	HMDB00067
1383	choline	Lipid	Phospholipid Metabolism	15506	LC/MS Pos	1256	675	104.107	67-48-1	305	149278	C00114	HMDB00097
1384	choline phosphate	Lipid	Phospholipid Metabolism	34396	LC/MS Pos	267	692.5	184.073	72556-74-2	1014	119298	C00588	HMDB01565
1203	cis-4-decenoyl carnitine	Lipid	Fatty Acid Metabolism(Acyl Carnitine)	38178	LC/MS Pos	100002259	4468	314.233	98930-66-6
60	cis-urocanate	Amino Acid	Histidine Metabolism	40410	LC/MS Neg	100003425	1200	137.036	7699-35-6	1549103	1266070
992	cis-vaccenate (18:1n7)	Lipid	Long Chain Fatty Acid	33970	GC/MS	100001228	1987	339.3	506-17-2	5282761	4445888	C08367	HMDB03231
946	citrate	Energy	TCA Cycle	1564	GC/MS	1124	1763.4	273.1	77-92-9	311	305	C00158	HMDB00094
325	citrulline	Amino Acid	Urea cycle; Arginine and Proline Metabolism	2132	LC/MS Pos	391	730.3	176.103	372-75-8	9750	810	C00327	HMDB00904
2524	coenzyme A	Cofactors and Vitamins	Pantothenate and CoA Metabolism	46322	LC/MS Neg	270	1448	382.55	85-61-0;18439-24-2	317	311	C00010	HMDB01423
1684	cortisol	Lipid	Steroid	1712	LC/MS Pos	356	4561.9	363.217	50-23-7	5754		C00735	HMDB00063
1689	cortisone	Lipid	Steroid	1769	LC/MS Pos	273	4407.9	361.201	53-06-5	222786	361685	C00762	HMDB02802
349	creatine	Amino Acid	Creatine Metabolism	27718	LC/MS Neg	1221	763	130.062	57-00-1	586	566	C00300	HMDB00064
352	creatine phosphate	Amino Acid	Creatine Metabolism	33951	LC/MS Neg	100000112	603	210.029	922-32-7	587	567	C02305	HMDB01511
350	creatinine	Amino Acid	Creatine Metabolism	513	LC/MS Neg	275	1071.8	112.052	60-27-5	588	568	C00791	HMDB00562
2469	cytidine	Nucleotide	Pyrimidine Metabolism, Cytidine containing	514	LC/MS Neg	827	1325	242.078	65-46-3	6175	5940	C00475	HMDB00089
1385	cytidine 5'-diphosphocholine	Lipid	Phospholipid Metabolism	34418	LC/MS Pos	1220	776.6	489.115	33818-15-4	13804	21531769	C00307	HMDB01413
2466	cytidine 5'-monophosphate (5'-CMP)	Nucleotide	Pyrimidine Metabolism, Cytidine containing	2372	LC/MS Pos	282	890	324.059	63-37-6	6131	5414497	C00055	HMDB00095
907	cytidine 5'-monophospho-N-acetylneuraminic acid	Carbohydrate	Nucleotide Sugar	36831	LC/MS Polar	1223	3900	613.14	3063-71-6	448209		C00128	HMDB01176
2465	cytidine diphosphate	Nucleotide	Pyrimidine Metabolism, Cytidine containing	2841	LC/MS Neg	280	580	402.011	34393-59-4	6132	5902	C00112	HMDB01546
2464	cytidine triphosphate	Nucleotide	Pyrimidine Metabolism, Cytidine containing	2844	LC/MS Neg	281	575	481.977	36051-68-0	6176	573	C00063	HMDB00082
1391	cytidine-5'-diphosphoethanolamine	Lipid	Phospholipid Metabolism	34410	LC/MS Polar	100001407	4210	445.053	72842-05-8	123727	287	C00570	HMDB01564
1201	decanoylcarnitine	Lipid	Fatty Acid Metabolism(Acyl Carnitine)	33941	LC/MS Pos	100001251	4700	316.248	1492-27-9	10245190	8420677		HMDB00651
1694	dehydroisoandrosterone sulfate (DHEA-S)	Lipid	Steroid	32425	LC/MS Neg	100000792	4745	367.158	651-48-9	12594	12074	C04555	HMDB01032
1213	deoxycarnitine	Lipid	Carnitine Metabolism	36747	LC/MS Pos	100001662	742.4	146.118	6249-56-5	134	705	C01181	HMDB01161
1031	dihomo-linoleate (20:2n6)	Lipid	Polyunsaturated Fatty Acid (n3 and n6)	17805	LC/MS Neg	1231	5730	307.264	2091-39-6	6439848	4944228	C16525	HMDB05060
1026	dihomo-linolenate (20:3n3 or n6)	Lipid	Polyunsaturated Fatty Acid (n3 and n6)	35718	LC/MS Neg	100001739	5596	305.249	17046-59-2	5280581	4471954	C03242	HMDB02925
773	dihydroxyacetone phosphate (DHAP)	Carbohydrate	Glycolysis, Gluconeogenesis, and Pyruvate Metabolism	15522	LC/MS Neg	309	603	168.991	102783-56-2	668	3833110	C00111	HMDB01473
332	dimethylarginine (SDMA + ADMA)	Amino Acid	Urea cycle; Arginine and Proline Metabolism	36808	LC/MS Pos	100001810	810	203.15	102783-24-4	123831	110375	C03626	HMDB01539
1030	docosadienoate (22:2n6)	Lipid	Polyunsaturated Fatty Acid (n3 and n6)	32415	LC/MS Neg	100001182	6034	335.296	7370-49-2	5282807	4445934	C16533	HMDB61714
1018	docosahexaenoate (DHA; 22:6n3)	Lipid	Polyunsaturated Fatty Acid (n3 and n6)	44675	LC/MS Neg	100000665	5525	327.233	6217-54-5	445580	393183	C06429	HMDB02183
1017	docosapentaenoate (n3 DPA; 22:5n3)	Lipid	Polyunsaturated Fatty Acid (n3 and n6)	32504	LC/MS Neg	100001181	5571	329.249	2234-74-4	6441454		C16513	HMDB01976
1029	docosapentaenoate (n6 DPA; 22:5n6)	Lipid	Polyunsaturated Fatty Acid (n3 and n6)	37478	LC/MS Neg	100001580	5624.5	329.249	25182-74-5	6441454	4945614	C16513	HMDB01976
1016	eicosapentaenoate (EPA; 20:5n3)	Lipid	Polyunsaturated Fatty Acid (n3 and n6)	18467	LC/MS Neg	2050	5450	301.217	10-2005-9;10417-94-4	446284	393682	C06428	HMDB01999
1002	eicosenoate (20:1n9 or 11)	Lipid	Long Chain Fatty Acid	33587	LC/MS Neg	100001335	5950	309.28		5282768	4445895		HMDB02231
1697	epiandrosterone sulfate	Lipid	Steroid	33973	LC/MS Neg	100001287	4855	369.174	22229-22-7		21403101	C07635	HMDB00365
2864	ergothioneine	Xenobiotics	Food Component/Plant	37459	LC/MS Pos	100002154	823	230.096	58511-63-0	3032311	2297320	C05570	HMDB03045
1006	erucate (22:1n9)	Lipid	Long Chain Fatty Acid	1552	LC/MS Neg	1087	6355.6	337.311	112-86-7	5281116	7924	C08316	HMDB02068
2866	erythritol	Xenobiotics	Food Component/Plant	20699	GC/MS	100000846	1517.5	217	149-32-6	222285	13835932	C00503	HMDB02994
939	erythronate*	Carbohydrate	Aminosugar Metabolism	42420	LC/MS Polar	100001320	2186	135.03	88759-55-1	2781043	2061231		HMDB00613
1389	ethanolamine	Lipid	Phospholipid Metabolism	1497	GC/MS	420	1304	174.1	141-43-5	700	13835336	C00189	HMDB00149
275	ethylmalonate	Amino Acid	Leucine, Isoleucine and Valine Metabolism	15765	LC/MS Polar	2054	2785	131.035	601-75-2	11756	11263		HMDB00622
2518	flavin adenine dinucleotide (FAD)	Cofactors and Vitamins	Riboflavin Metabolism	2134	LC/MS Neg	327	2425	784.15	146-14-5;84366-81-4	643975	559059	C00016	HMDB01248
2519	flavin mononucleotide (FMN)	Cofactors and Vitamins	Riboflavin Metabolism	15797	LC/MS Neg	100000251	2390	455.097	130-40-5	710	690	C00061	HMDB01520
868	fructose	Carbohydrate	Fructose, Mannose and Galactose Metabolism	48195	LC/MS Polar	878	2022.2	225.062	57-48-7	5984	5764	C00095	HMDB00660
768	fructose-6-phosphate	Carbohydrate	Glycolysis, Gluconeogenesis, and Pyruvate Metabolism	12021	GC/MS	1232	1994.9	315.1	103213-47-4	69507	19969987	C05345	HMDB00124
955	fumarate	Energy	TCA Cycle	1643	GC/MS	330	1382.1	245	100-17-8	444972	10197150	C00122	HMDB00134
884	galactitol (dulcitol)	Carbohydrate	Fructose, Mannose and Galactose Metabolism	1117	GC/MS	1003	1849.2	319.1	608-66-2	11850	11357	C01697	HMDB00107
892	galactonate	Carbohydrate	Fructose, Mannose and Galactose Metabolism	27719	LC/MS Polar	100001026	3085	195.051	299-28-5	128869	114198	C00880	HMDB00565
885	galactose 1-phosphate	Carbohydrate	Fructose, Mannose and Galactose Metabolism	15706	LC/MS Polar	100000300	4552	259.022	19046-60-7	123912		C00446	HMDB00645
389	gamma-glutamylalanine	Peptide	Gamma-glutamyl Amino Acid	37063	LC/MS Pos	100001843	1116	219.098	5875-41-2	440103	389104		HMDB29142
391	gamma-glutamylglutamate	Peptide	Gamma-glutamyl Amino Acid	36738	LC/MS Pos	331	1045	277.103	1116-22-9	92865	83831	C05282	HMDB11737
392	gamma-glutamylglutamine	Peptide	Gamma-glutamyl Amino Acid	2730	LC/MS Pos	1140	817.9	276.119	10148-81-9	150914	133013	C05283	HMDB11738
395	gamma-glutamylisoleucine*	Peptide	Gamma-glutamyl Amino Acid	34457	LC/MS Neg	100001485	1585	259.13		14253342	21403145		HMDB11170
396	gamma-glutamylleucine	Peptide	Gamma-glutamyl Amino Acid	18369	LC/MS Neg	1268	1636.5	259.13	2566-39-4	151023	133115		HMDB11171
403	gamma-glutamylvaline	Peptide	Gamma-glutamyl Amino Acid	43829	LC/MS Neg	100001126	1072	245.114	2746-34-1	7015683			HMDB11172
2798	gluconate	Xenobiotics	Food Component/Plant	587	LC/MS Polar	338	2922	195.051	527-07-1	10690	10240	C00257	HMDB00625
912	glucosamine-6-phosphate	Carbohydrate	Aminosugar Metabolism	580	LC/MS Polar	290	4521.5	258.038	3616-42-0	439217	8013767	C00352	HMDB01254
764	glucose	Carbohydrate	Glycolysis, Gluconeogenesis, and Pyruvate Metabolism	48152	LC/MS Polar	572	2342	225.062	50-99-7	79025	71358	C00031	HMDB00122
766	glucose 1-phosphate	Carbohydrate	Glycolysis, Gluconeogenesis, and Pyruvate Metabolism	33755	GC/MS	1233	1853	217.1	56401-20-8	65533	58977	C00103	HMDB01586
765	glucose-6-phosphate (G6P)	Carbohydrate	Glycolysis, Gluconeogenesis, and Pyruvate Metabolism	31260	LC/MS Polar	291	4537	259.022	103192-55-8	5958	19952394	C00668	HMDB01401
37	glutamate	Amino Acid	Glutamate Metabolism	57	LC/MS Pos	561	710	148.06	56-86-0	611	591	C00025	HMDB00148
47	glutamate, gamma-methyl ester	Amino Acid	Glutamate Metabolism	33487	LC/MS Pos	100001103	1068.8	162.076	1499-55-4	68662	66546
38	glutamine	Amino Acid	Glutamate Metabolism	53	LC/MS Pos	563	680	147.076	56-85-9	5961	5746	C00064	HMDB00641
81	glutarate (pentanedioate)	Amino Acid	Lysine Metabolism	396	LC/MS Polar	339	2900	131.035	110-94-1	743	3618533	C00489	HMDB00661
82	glutarylcarnitine (C5)	Amino Acid	Lysine Metabolism	44664	LC/MS Pos	100001593	1583.3	276.144	102636-82-8	71464488	21403175		HMDB13130
374	glutathione, oxidized (GSSG)	Amino Acid	Glutathione Metabolism	38783	LC/MS Pos	448	1512	307.083	103239-24-3	65359	58835	C00127	HMDB03337
373	glutathione, reduced (GSH)	Amino Acid	Glutathione Metabolism	2127	LC/MS Pos	496	1270	308.091	70-18-8	124886	111188	C00051	HMDB00125
784	glycerate	Carbohydrate	Glycolysis, Gluconeogenesis, and Pyruvate Metabolism	1572	LC/MS Polar	1052	2070.4	105.019	600-19-1	752	732	C00258	HMDB00139
1524	glycerol	Lipid	Glycerolipid Metabolism	15122	LC/MS Neg	1254	758	91.0401	56-81-5	753	733	C00116	HMDB00131
1525	glycerol 3-phosphate (G3P)	Lipid	Glycerolipid Metabolism	15365	GC/MS	100000258	1719.7	357.1	29849-82-9	754	734	C00093	HMDB00126
1392	glycerophosphoethanolamine	Lipid	Phospholipid Metabolism	37455	LC/MS Polar	100001620	3075	214.049	33049-08-0	123874	110410	C01233	HMDB00114
1394	glycerophosphoinositol*	Lipid	Phospholipid Metabolism	47155	LC/MS Polar	100001621	3850	333.059	16824-65-0
1386	glycerophosphorylcholine (GPC)	Lipid	Phospholipid Metabolism	15990	LC/MS Pos	100000269	709.9	258.11	28319-77-9	71920	571409	C00670	HMDB00086
1	glycine	Amino Acid	Glycine, Serine and Threonine Metabolism	11777	GC/MS	340	1166	101.9	56-40-6	750	730	C00037	HMDB00123
1772	glycochenodeoxycholate	Lipid	Primary Bile Acid Metabolism	32346	LC/MS Neg	1628	5236.1	448.307	16564-43-5	12544		C05466	HMDB00637
1769	glycocholate	Lipid	Primary Bile Acid Metabolism	18476	LC/MS Neg	342	5163	464.302	475-31-0;863-57-0	10140	9734	C01921	HMDB00138
1808	glycocholenate sulfate*	Lipid	Secondary Bile Acid Metabolism	32599	LC/MS Neg	100001989	4750	254.623
1780	glycodeoxycholate	Lipid	Secondary Bile Acid Metabolism	18477	LC/MS Neg	100000436	5281	448.307	360-65-6	3035026		C05464	HMDB00631
1786	glycolithocholate sulfate*	Lipid	Secondary Bile Acid Metabolism	32620	LC/MS Neg	100001657	5011	255.631	15324-64-8	72222	65188	C11301	HMDB02639
500	glycylisoleucine	Peptide	Dipeptide	36659	LC/MS Pos	100001790	2080	189.123	19461-38-2	88079	19972556		HMDB28844
501	glycylleucine	Peptide	Dipeptide	34398	LC/MS Pos	100001258	2190.9	189.123	869-19-2	92843	83812	C02155	HMDB00759
511	glycylvaline	Peptide	Dipeptide	18357	LC/MS Pos	100000487	1561.6	175.108	1963-21-9	97417	2006926		HMDB28854
2413	guanine	Nucleotide	Purine Metabolism, Guanine containing	32352	LC/MS Pos	172	1035	152.057	73-40-5	764	744	C00242	HMDB00132
2412	guanosine	Nucleotide	Purine Metabolism, Guanine containing	1573	LC/MS Pos	1099	1680	284.099	118-00-3	6802	6544	C00387	HMDB00133
2408	guanosine 3'-monophosphate (3'-GMP)	Nucleotide	Purine Metabolism, Guanine containing	39786	LC/MS Polar	100002704	4210	362.051	117-68-0	3522	3402
2533	gulonic acid*	Cofactors and Vitamins	Ascorbate and Aldarate Metabolism	46957	LC/MS Polar	100001586	2750	195.051	20246-53-1	9794176	7969943
2568	heme	Cofactors and Vitamins	Hemoglobin and Porphyrin Metabolism	41754	LC/MS Pos	100001386	5003	616.176	14875-96-8	26945		C00032	HMDB03178
971	heptanoate (7:0)	Lipid	Medium Chain Fatty Acid	1644	LC/MS Neg	925	3670	129.092	111-14-8	8094	7803	C17714	HMDB00666
1198	hexanoylcarnitine	Lipid	Fatty Acid Metabolism(Acyl Carnitine)	32328	LC/MS Pos	100000781	3194	260.186	6920-35-0	6426853	4932273		HMDB00705
2597	hippurate	Xenobiotics	Benzoate Metabolism	15753	LC/MS Neg	100000014	2106.9	178.051	495-69-2	464	451	C01586	HMDB00714
64	histamine	Amino Acid	Histidine Metabolism	1574	LC/MS Pos	354	579	112.087	51-45-6	774	753	C00388	HMDB00870
52	histidine	Amino Acid	Histidine Metabolism	59	LC/MS Neg	355	755.9	154.062	5934-29-2	6274	752	C00135	HMDB00177
327	homoarginine	Amino Acid	Urea cycle; Arginine and Proline Metabolism	22137	LC/MS Polar	100000961	5123	187.12	156-86-5	9085	8732	C01924	HMDB00670
407	homocarnosine	Peptide	Dipeptide Derivative	1633	LC/MS Neg	41	820	239.115	3650-73-5	10243361	8418848	C00884	HMDB00745
328	homocitrulline	Amino Acid	Urea cycle; Arginine and Proline Metabolism	22138	LC/MS Pos	100000963	821.7	190.119	1190-49-4	65072	58582	C02427	HMDB00679
3174	hydrochlorothiazide	Xenobiotics	Drug	39625	LC/MS Neg	100002734	2046	295.957	58-93-5	3639	3513	C07041	HMDB01928
1196	hydroxybutyrylcarnitine*	Lipid	Fatty Acid Metabolism(Acyl Carnitine)	43264	LC/MS Pos	100003926	1477	248.149		53481617			HMDB13127
313	hypotaurine	Amino Acid	Methionine, Cysteine, SAM and Taurine Metabolism	590	LC/MS Polar	358	2763.4	108.012	300-84-5	107812	96959	C00519	HMDB00965
2358	hypoxanthine	Nucleotide	Purine Metabolism, (Hypo)Xanthine/Inosine containing	3127	LC/MS Neg	171	1291.2	135.031	68-94-0	790	768	C00262	HMDB00157
63	imidazole lactate	Amino Acid	Histidine Metabolism	15716	LC/MS Neg	100000263	739.4	155.046	14403-45-3	440129	389128	C05568	HMDB02320
62	imidazole propionate	Amino Acid	Histidine Metabolism	40730	LC/MS Pos	100003434	1020	141.066	1074-59-5	70630	63798		HMDB02271
196	indoleacetate	Amino Acid	Tryptophan Metabolism	27513	LC/MS Neg	100001034	2200	174.056	6505-45-9	802	780	C00954	HMDB00197
195	indolelactate	Amino Acid	Tryptophan Metabolism	18349	LC/MS Pos	100000463	3514	206.081	832-97-3	92904	83867	C02043	HMDB00671
198	indolepropionate	Amino Acid	Tryptophan Metabolism	32405	LC/MS Neg	100001083	2795	188.072	830-96-6	3744	3613		HMDB02302
2357	inosine	Nucleotide	Purine Metabolism, (Hypo)Xanthine/Inosine containing	1123	LC/MS Neg	361	1602.1	267.073	58-63-9	6021	21241953	C00294	HMDB00195
2356	inosine 5'-monophosphate (IMP)	Nucleotide	Purine Metabolism, (Hypo)Xanthine/Inosine containing	2133	LC/MS Neg	362	650	347.04	4691-65-0	8582	5482599	C00130	HMDB00175
1364	inositol 1-phosphate (I1P)	Lipid	Inositol Metabolism	1481	GC/MS	370	2057.8	318.1	573-35-3;106032-59-1	440194	17215924	C04006	HMDB00213
771	Isobar: fructose 1,6-diphosphate, glucose 1,6-diphosphate, myo-inositol 1,4 or 1,3-diphosphate	Carbohydrate	Glycolysis, Gluconeogenesis, and Pyruvate Metabolism	46896	LC/MS Neg	100002180	551	338.989
280	isobutyrylcarnitine	Amino Acid	Leucine, Isoleucine and Valine Metabolism	33441	LC/MS Pos	100001055	1955.1	232.154	25518-49-4	168379			HMDB00736
264	isoleucine	Amino Acid	Leucine, Isoleucine and Valine Metabolism	1125	LC/MS Pos	376	1599	132.102	73-32-5	6306	769	C00407	HMDB00172
535	isoleucylglycine	Peptide	Dipeptide	40008	LC/MS Pos	100003169	1740	189.123	868-28-0	342532	303621
243	isovalerylcarnitine	Amino Acid	Leucine, Isoleucine and Valine Metabolism	34407	LC/MS Pos	100001393	2504.9	246.17	31023-24-2	6426851	4932271		HMDB00688
202	kynurenate	Amino Acid	Tryptophan Metabolism	1417	LC/MS Neg	98	2224	188.035	492-27-3	3845	3712	C01717	HMDB00715
201	kynurenine	Amino Acid	Tryptophan Metabolism	15140	LC/MS Pos	100000265	1902.1	209.092	2922-83-0	161166	141580	C00328	HMDB00684
781	lactate	Carbohydrate	Glycolysis, Gluconeogenesis, and Pyruvate Metabolism	527	GC/MS	482	1102.8	116.9	79-33-4	612	592	C00186	HMDB00190
1204	laurylcarnitine	Lipid	Fatty Acid Metabolism(Acyl Carnitine)	34534	LC/MS Pos	100001392	5070	344.28	25518-54-1	10427569	8602997		HMDB02250
235	leucine	Amino Acid	Leucine, Isoleucine and Valine Metabolism	60	LC/MS Pos	397	1680.2	132.102	61-90-5	6106	5880	C00123	HMDB00687
553	leucylglycine	Peptide	Dipeptide	40045	LC/MS Pos	100003185	1805	189.123	686-50-0	79070	71402
3194	lidocaine	Xenobiotics	Drug	35661	LC/MS Neg	100001538	5283	233.166	137-58-6	3676	3548	D00358	HMDB14426
1148	linoleamide (18:2n6)	Lipid	Fatty Acid, Amide	32455	LC/MS Neg	1492	6205	278.249	3999-01-07	6435901	4940587
1022	linoleate (18:2n6)	Lipid	Polyunsaturated Fatty Acid (n3 and n6)	1105	LC/MS Neg	180	5535	279.233	60-33-3	5280450	4444105	C01595	HMDB00673
1024	linolenate [alpha or gamma; (18:3n3 or 6)]	Lipid	Polyunsaturated Fatty Acid (n3 and n6)	34035	LC/MS Neg	100001337	5450	277.217		5280934	4444437	C06426	HMDB03073
1209	linoleoylcarnitine*	Lipid	Fatty Acid Metabolism(Acyl Carnitine)	46223	LC/MS Pos	100003151	5190	424.342	36816-10-1	6450015	4952667		HMDB06469
72	lysine	Amino Acid	Lysine Metabolism	1301	LC/MS Pos	407	613.8	147.113	56-87-1	5962	5747	C00047	HMDB00182
956	malate	Energy	TCA Cycle	1303	LC/MS Neg	409	615.6	133.014	6915-15-7	525	510	C00149	HMDB00156
1164	malonylcarnitine	Lipid	Fatty Acid Synthesis	37059	LC/MS Pos	100001526	965	248.113	853728-01-5	22833583	21403153		HMDB02095
2909	maltitol	Xenobiotics	Food Component/Plant	20701	GC/MS	100000848	2207	361.2	585-88-6	3871	3736		HMDB02928
832	maltose	Carbohydrate	Glycogen Metabolism	15806	GC/MS	913	2142.1	204.1	6363-53-7	10991489	388469	C00208	HMDB00163
827	maltotetraose	Carbohydrate	Glycogen Metabolism	15910	LC/MS Neg	100000275	910	665.215	34612-38-9	446495	393830	C02052	HMDB01296
829	maltotriose	Carbohydrate	Glycogen Metabolism	44688	LC/MS Polar	100000276	4286.4	549.167	1109-28-0	439586	388669	C01835	HMDB01262
878	mannitol	Carbohydrate	Fructose, Mannose and Galactose Metabolism	15335	GC/MS	100000277	1839	319.1	69-65-8	6251	6015	C00392	HMDB00765
874	mannose	Carbohydrate	Fructose, Mannose and Galactose Metabolism	584	GC/MS	803	1753.5	204	3458-28-4	18950	141983	C00159	HMDB00169
875	mannose-6-phosphate	Carbohydrate	Fructose, Mannose and Galactose Metabolism	1470	GC/MS	294	2035.9	387.2	70442-25-0;104872-94-8	439198	19969422	C00275	HMDB01078
986	margarate (17:0)	Lipid	Long Chain Fatty Acid	1121	LC/MS Neg	891	5731	269.249	506-12-7	10465	10033		HMDB02259
1033	mead acid (20:3n9)	Lipid	Polyunsaturated Fatty Acid (n3 and n6)	35174	LC/MS Neg	100001472	5650	305.249	20590-32-3	5312531	4471956		HMDB10378
287	methionine	Amino Acid	Methionine, Cysteine, SAM and Taurine Metabolism	1302	LC/MS Pos	415	1250	150.058	63-68-3	6137	5907	C00073	HMDB00696
291	methionine sulfone	Amino Acid	Methionine, Cysteine, SAM and Taurine Metabolism	44878	LC/MS Polar	100004635	1880	180.034	820-10-0	69961	63154
292	methionine sulfoxide	Amino Acid	Methionine, Cysteine, SAM and Taurine Metabolism	18374	LC/MS Pos	100000039	741.1	166.053	3226-65-1	158980	139840	C02989	HMDB02005
2993	methyl glucopyranoside (alpha + beta)	Xenobiotics	Food Component/Plant	46144	LC/MS Neg	100005864	1070	193.072
2635	methyl-4-hydroxybenzoate	Xenobiotics	Benzoate Metabolism	34386	LC/MS Neg	100001252	3671	151.04	99-76-3	7456	7176	D01400	HMDB32572
2656	methyl-4-hydroxybenzoate sulfate	Xenobiotics	Benzoate Metabolism	48429	LC/MS Neg	100006116	2873	230.997
2490	methylphosphate	Nucleotide	Purine and Pyrimidine Metabolism	37070	LC/MS Neg	100001805	605	110.985	7023-27-0	13130	12578		HMDB61711
256	methylsuccinate	Amino Acid	Leucine, Isoleucine and Valine Metabolism	15745	LC/MS Polar	2051	2800	131.035	498-21-5	10349	9922		HMDB01844
1356	myo-inositol	Lipid	Inositol Metabolism	19934	GC/MS	363	1924.9	217	87-89-8	892	10239179	C00137	HMDB00211
981	myristoleate (14:1n5)	Lipid	Long Chain Fatty Acid	32418	LC/MS Neg	100001198	5346.9	225.186	544-64-9	5281119	4444564	C08322	HMDB02000
1212	myristoleoylcarnitine*	Lipid	Fatty Acid Metabolism(Acyl Carnitine)	48182	LC/MS Pos	100006051	5120	370.295	889848-55-9
1205	myristoylcarnitine	Lipid	Fatty Acid Metabolism(Acyl Carnitine)	33952	LC/MS Pos	100001270	5142.1	372.311	18822-89-4	53477791	4932274		HMDB05066
2917	N-(2-furoyl)glycine	Xenobiotics	Food Component/Plant	31536	LC/MS Pos	100001086	2099.5	170.045	5657-19-2;5657-19-2	21863	20549		HMDB00439
75	N-6-trimethyllysine	Amino Acid	Lysine Metabolism	1498	LC/MS Pos	189	690	189.16	23284-33-5	440120	140379	C03793	HMDB01325
41	N-acetyl-aspartyl-glutamate (NAAG)	Amino Acid	Glutamate Metabolism	35665	LC/MS Pos	100001612	1575.4	305.098	3106-85-2	5255	5065	C12270	HMDB01067
25	N-acetylalanine	Amino Acid	Alanine and Aspartate Metabolism	1585	LC/MS Neg	1110	861.2	130.051	97-69-8	88064	79449	C02847	HMDB00766
333	N-acetylarginine	Amino Acid	Urea cycle; Arginine and Proline Metabolism	33953	LC/MS Pos	100001266	1116	217.13	155-84-0	67427	60752	C02562	HMDB04620
31	N-acetylaspartate (NAA)	Amino Acid	Alanine and Aspartate Metabolism	22185	LC/MS Pos	100000787	1222.4	176.055	997-55-7;997-55-7	65065	58576	C01042	HMDB00812
406	N-acetylcarnosine	Peptide	Dipeptide Derivative	43488	LC/MS Pos	100004046	1166	269.124	56353-15-2	9903482	8079136		HMDB12881
39	N-acetylglutamate	Amino Acid	Glutamate Metabolism	15720	LC/MS Pos	100000282	1492	190.071	5817-08-03	70914	1266066	C00624	HMDB01138
40	N-acetylglutamine	Amino Acid	Glutamate Metabolism	33943	LC/MS Pos	100001253	1193	189.087	2490-97-3	182230	158492	C02716	HMDB06029
2	N-acetylglycine	Amino Acid	Glycine, Serine and Threonine Metabolism	27710	LC/MS Neg	100001006	731	116.035	543-24-8	10972	10507		HMDB00532
236	N-acetylleucine	Amino Acid	Leucine, Isoleucine and Valine Metabolism	1587	LC/MS Neg	1082	2361.4	172.098	1188-21-2	70912	64075	C02710	HMDB11756
288	N-acetylmethionine	Amino Acid	Methionine, Cysteine, SAM and Taurine Metabolism	1589	LC/MS Pos	1083	2587	192.069	65-82-7	448580	395338	C02712	HMDB11745
293	N-acetylmethionine sulfoxide	Amino Acid	Methionine, Cysteine, SAM and Taurine Metabolism	45428	LC/MS Pos	100005463	1400	208.064		193368	167798
927	N-acetylneuraminate	Carbohydrate	Aminosugar Metabolism	32377	LC/MS Polar	1162	3072.6	308.099	131-48-6	439197	10292217	C00270	HMDB00230
98	N-acetylphenylalanine	Amino Acid	Phenylalanine and Tyrosine Metabolism	33950	LC/MS Neg	100001256	2597	206.082	2018-61-3	74839	67404	C03519	HMDB00512
365	N-acetylputrescine	Amino Acid	Polyamine Metabolism	37496	LC/MS Pos	192	840	131.118	18233-70-0	122356	109095	C02714	HMDB02064
10	N-acetylserine	Amino Acid	Glycine, Serine and Threonine Metabolism	37076	LC/MS Pos	100001851	1021	148.06	97-14-3	65249	58744		HMDB02931
315	N-acetyltaurine	Amino Acid	Methionine, Cysteine, SAM and Taurine Metabolism	48187	LC/MS Neg	100005466	800	166.018		159864	140553
15	N-acetylthreonine	Amino Acid	Glycine, Serine and Threonine Metabolism	33939	LC/MS Pos	100001274	1480	162.076	17093-74-2	152204	3841173	C01118
111	N-acetyltyrosine	Amino Acid	Phenylalanine and Tyrosine Metabolism	32390	LC/MS Neg	100001104	1680	222.077	537-55-3	68310	61606		HMDB00866
277	N-acetylvaline	Amino Acid	Leucine, Isoleucine and Valine Metabolism	1591	LC/MS Neg	1084	1704	158.082	96-81-1	66789	60154		HMDB11757
336	N-delta-acetylornithine	Amino Acid	Urea cycle; Arginine and Proline Metabolism	43249	LC/MS Pos	100004523	887	175.108		9920500	8096135
3215	N-ethylglycinexylidide	Xenobiotics	Drug	33080	LC/MS Pos	100001539	2630	207.149	7728-40-7	24415	22824	C16561	HMDB60656
289	N-formylmethionine	Amino Acid	Methionine, Cysteine, SAM and Taurine Metabolism	2829	LC/MS Neg	194	1543.8	176.039	4289-98-9	439750	388809	C03145	HMDB01015
3443	N-methylpipecolate	Xenobiotics	Chemical	47101	LC/MS Pos	100005383	1129	144.102	41447-17-0	11862129;11286529	9461516
340	N-methylproline	Amino Acid	Urea cycle; Arginine and Proline Metabolism	37431	LC/MS Pos	100001956	831	130.086	475-11-6	557	541
1351	N-oleoyltaurine	Lipid	Endocannabinoid	39732	LC/MS Neg	100003119	5610	388.253	52514-04-2	6437033	4941625
1353	N-palmitoyltaurine	Lipid	Endocannabinoid	39835	LC/MS Neg	100003239	5560	362.237	83982-06-3		14435932
1352	N-stearoyltaurine	Lipid	Endocannabinoid	39730	LC/MS Neg	100003240	5782	390.268	63155-80-6	168274	147194
2514	N1-Methyl-2-pyridone-5-carboxamide	Cofactors and Vitamins	Nicotinate and Nicotinamide Metabolism	40469	LC/MS Pos	100001468	1688	153.066	701-44-0	69698	62899	C05842	HMDB04193
2385	N1-methyladenosine	Nucleotide	Purine Metabolism, Adenine containing	15650	LC/MS Pos	1242	1399	282.12	15763-06-1	27476	4573813	C02494	HMDB03331
2419	N1-methylguanosine	Nucleotide	Purine Metabolism, Guanine containing	31609	LC/MS Pos	100001122	1869	298.115	2140-65-0	96373	86996		HMDB01563
2421	N2,N2-dimethylguanosine	Nucleotide	Purine Metabolism, Guanine containing	35137	LC/MS Pos	100001412	2168	312.13	2140-67-2	92919	83878		HMDB04824
73	N2-acetyllysine	Amino Acid	Lysine Metabolism	36751	LC/MS Pos	100001721	836	189.123	1946-82-3	92907	83869	C12989	HMDB00446
2473	N4-acetylcytidine	Nucleotide	Pyrimidine Metabolism, Cytidine containing	35130	LC/MS Pos	100001413	2040	286.103	3768-18-1	107461	96702		HMDB05923
74	N6-acetyllysine	Amino Acid	Lysine Metabolism	36752	LC/MS Pos	100001734	1140	189.123	692-04-6	92832	83801	C02727	HMDB00206
942	N6-carboxymethyllysine	Carbohydrate	Advanced Glycation End-product	36713	LC/MS Polar	100001768	4315	203.104	5746-04-03		11217184
2404	N6-succinyladenosine	Nucleotide	Purine Metabolism, Adenine containing	48130	LC/MS Pos	100001664	2222	384.115	4542-23-8				HMDB00912
1583	nervonoyl sphingomyelin*	Lipid	Sphingolipid Metabolism	47153	LC/MS Polar	100005986	850	857.675	94359-13-4		24846874
2495	nicotinamide	Cofactors and Vitamins	Nicotinate and Nicotinamide Metabolism	594	LC/MS Pos	432	1271.1	123.055	98-92-0	936	911	C00153	HMDB01406
2499	nicotinamide adenine dinucleotide (NAD+)	Cofactors and Vitamins	Nicotinate and Nicotinamide Metabolism	44685	LC/MS Pos	1310	1407	332.562	53-84-9	5893	5681	C00003	HMDB00902
2500	nicotinamide adenine dinucleotide reduced (NADH)	Cofactors and Vitamins	Nicotinate and Nicotinamide Metabolism	31475	LC/MS Neg	428	1540	664.117	58-68-4;606-68-8	439153	388299	C00004	HMDB01487
2492	nicotinate	Cofactors and Vitamins	Nicotinate and Nicotinamide Metabolism	1504	LC/MS Neg	567	1180	122.025	59-67-6	938	913	C00253	HMDB01488
2628	O-methylcatechol sulfate	Xenobiotics	Benzoate Metabolism	46111	LC/MS Neg	100004208	2344	203.002		22473	21078
3340	O-sulfo-L-tyrosine	Xenobiotics	Chemical	45413	LC/MS Neg	100005384	990	260.023		514186	448617
1199	octanoylcarnitine	Lipid	Fatty Acid Metabolism(Acyl Carnitine)	33936	LC/MS Pos	100001247	4090	288.217	3671-77-0	123701	110274	C02838	HMDB00791
1145	oleamide	Lipid	Fatty Acid, Amide	32458	LC/MS Neg	1504	6581.5	280.265	301-02-0	5283387	4446508	C19670	HMDB02117
990	oleate (18:1n9)	Lipid	Long Chain Fatty Acid	1359	GC/MS	442	1984.4	339.2	112-80-1	445639	393217	C00712	HMDB00207
1507	oleoyl-linoleoyl-glycerophosphocholine (1)*	Lipid	Lysolipid	48270	LC/MS Polar	100006165	777	828.576
1508	oleoyl-linoleoyl-glycerophosphocholine (2)*	Lipid	Lysolipid	48390	LC/MS Polar	100006166	860	828.576
1210	oleoylcarnitine	Lipid	Fatty Acid Metabolism(Acyl Carnitine)	35160	LC/MS Pos	100001501	5215	426.358	38677-66-6	6441392;53477789	21403150		HMDB05065
382	ophthalmate	Amino Acid	Glutathione Metabolism	34592	LC/MS Pos	100001311	1462	290.135	495-27-2	7018721	7993181		HMDB05765
323	ornithine	Amino Acid	Urea cycle; Arginine and Proline Metabolism	1493	GC/MS	444	1763.8	142	3184-13-2	6262	6026	C00077	HMDB03374
2432	orotate	Nucleotide	Pyrimidine Metabolism, Orotate containing	1505	LC/MS Polar	445	1638.1	155.01	50887-69-9	967	942	C00295	HMDB00226
2434	orotidine	Nucleotide	Pyrimidine Metabolism, Orotate containing	35172	LC/MS Polar	100001416	2250	287.052	314-50-1	92751	83729	C01103	HMDB00788
2532	oxalate (ethanedioate)	Cofactors and Vitamins	Ascorbate and Aldarate Metabolism	20694	LC/MS Polar	100000841	3803	88.988	144-62-7	971	946	C00209	HMDB02329
127	p-cresol sulfate	Amino Acid	Phenylalanine and Tyrosine Metabolism	36103	LC/MS Neg	100001315	2890	187.007	3233-57-7	4615423	3806480	C01468	HMDB11635
983	palmitate (16:0)	Lipid	Long Chain Fatty Acid	1336	LC/MS Neg	424	5618	255.233	57-10-3	985	960	C00249	HMDB00220
1584	palmitoleoyl sphingomyelin*	Lipid	Sphingolipid Metabolism	42459	LC/MS Polar	100004329	866	745.55
1565	palmitoyl sphingomyelin	Lipid	Sphingolipid Metabolism	37506	LC/MS Polar	100002107	870	747.566	6254-89-3	9939941	8115562
1497	palmitoyl-arachidonoyl-glycerophosphocholine (1)*	Lipid	Lysolipid	48383	LC/MS Polar	100006132	870	826.56
1498	palmitoyl-arachidonoyl-glycerophosphocholine (2)*	Lipid	Lysolipid	48392	LC/MS Polar	100006157	790	826.56
1499	palmitoyl-linoleoyl-glycerophosphocholine (1)*	Lipid	Lysolipid	48385	LC/MS Polar	100006133	870	802.56
1500	palmitoyl-linoleoyl-glycerophosphocholine (2)*	Lipid	Lysolipid	48269	LC/MS Polar	100006134	783	802.56
1502	palmitoyl-oleoyl-glycerophosphocholine (1)*	Lipid	Lysolipid	48267	LC/MS Polar	100006142	853	804.576
1503	palmitoyl-oleoyl-glycerophosphoglycerol (1)*	Lipid	Lysolipid	48314	LC/MS Polar	100006137	716	747.519
1509	palmitoyl-oleoyl-glycerophosphoglycerol (2)*	Lipid	Lysolipid	48391	LC/MS Polar	100006159	745	747.519
1207	palmitoylcarnitine	Lipid	Fatty Acid Metabolism(Acyl Carnitine)	44681	LC/MS Pos	100000776	5204	400.342	6865-14-1	461	448	C02990	HMDB00222
2520	pantothenate	Cofactors and Vitamins	Pantothenate and CoA Metabolism	1508	LC/MS Neg	1024	1498.7	218.103	137-08-6	6613	6361	C00864	HMDB00210
2660	paraxanthine	Xenobiotics	Xanthine Metabolism	18254	LC/MS Pos	100000453	2443.3	181.072	611-59-6	4687	4525	C13747	HMDB01860
125	phenol sulfate	Amino Acid	Phenylalanine and Tyrosine Metabolism	32553	LC/MS Neg	100001510	2156	172.991	937-34-8	74426	67018	C02180	HMDB60015
109	phenylacetylglutamine	Amino Acid	Phenylalanine and Tyrosine Metabolism	35126	LC/MS Pos	100001417	2875	265.118	28047-15-6	92258	270643	C04148	HMDB06344
97	phenylalanine	Amino Acid	Phenylalanine and Tyrosine Metabolism	64	LC/MS Pos	460	2050	166.086	63-91-2	6140	5910	C00079	HMDB00159
3427	phenylcarnitine*	Xenobiotics	Chemical	43265	LC/MS Pos	100004555	2629.9	266.139	105450-08-6
102	phenyllactate (PLA)	Amino Acid	Phenylalanine and Tyrosine Metabolism	22130	LC/MS Neg	100000774	2208	165.056	828-01-3	3848	3715	C05607	HMDB00779
101	phenylpyruvate	Amino Acid	Phenylalanine and Tyrosine Metabolism	566	LC/MS Neg	241	2517.6	163.04	156-06-9	997	972	C00166	HMDB00205
968	phosphate	Energy	Oxidative Phosphorylation	42109	LC/MS Neg	461	608	96.9696	7664-38-2	1061	1032	C00009	HMDB01429
779	phosphoenolpyruvate (PEP)	Carbohydrate	Glycolysis, Gluconeogenesis, and Pyruvate Metabolism	597	LC/MS Neg	463	587.3	166.975	10526-80-4	1005	980	C00074	HMDB00263
1390	phosphoethanolamine	Lipid	Phospholipid Metabolism	1600	LC/MS Neg	1026	638	140.012	1071-23-4	1015	990	C00346	HMDB00224
89	pipecolate	Amino Acid	Lysine Metabolism	1444	LC/MS Pos	1025	1120	130.086	4043-87-2	849	826	C00408	HMDB00070
2940	piperine	Xenobiotics	Food Component/Plant	33935	LC/MS Pos	100001267	5135	286.144	94-62-2	638024	553590	C03882	HMDB29377
344	pro-hydroxy-pro	Amino Acid	Urea cycle; Arginine and Proline Metabolism	35127	LC/MS Pos	100001167	950	229.118	18684-24-7	11673055	9847785		HMDB06695
324	proline	Amino Acid	Urea cycle; Arginine and Proline Metabolism	1898	LC/MS Pos	480	805	116.071	147-85-3	145742	128566	C00148	HMDB00162
1181	propionylcarnitine	Lipid	Fatty Acid Metabolism (also BCAA Metabolism)	32452	LC/MS Pos	100001162	1590	218.139	17298-37-2	107738	96904	C03017	HMDB00824
2446	pseudouridine	Nucleotide	Pyrimidine Metabolism, Uracil containing	33442	LC/MS Neg	821	1100	243.062	1445-07-4	15047	21403010	C02067	HMDB00767
359	putrescine	Amino Acid	Polyamine Metabolism	1408	LC/MS Pos	49	564	89.1073	110-60-1	1045	13837702	C00134	HMDB01414
48	pyroglutamine*	Amino Acid	Glutamate Metabolism	46225	LC/MS Pos	100001540	750	129.066	2353-44-8	134508	118562
3021	pyrraline	Xenobiotics	Food Component/Plant	48428	LC/MS Neg	100001767	2304	253.119	74509-14-1		19980286
780	pyruvate	Carbohydrate	Glycolysis, Gluconeogenesis, and Pyruvate Metabolism	22250	LC/MS Polar	823	2650	175.025	127-17-3	1060	96901	C00022	HMDB00243
2950	quinate	Xenobiotics	Food Component/Plant	18335	LC/MS Polar	100000442	2432.9	191.056	77-95-2	6508	10246715	C00296	HMDB03072
3243	quinine	Xenobiotics	Drug	39767	LC/MS Neg	100002968	5252	323.176	130-95-0	2728270	2010267
801	ribonate	Carbohydrate	Pentose Metabolism	27731	LC/MS Polar	100001007	2425	165.04	5336-08-03	5460677	4574162	C01685	HMDB00867
790	ribose 1-phosphate	Carbohydrate	Pentose Phosphate Pathway	1763	LC/MS Polar	219	4025	229.012	50-99-7;58459-37-3	439236	388373	C00620	HMDB01489
789	ribose 5-phosphate	Carbohydrate	Pentose Phosphate Pathway	561	GC/MS	19	1928.4	315.1	18265-46-8;108321-05-7		394672	C00117	HMDB01548
794	ribulose/xylulose 5-phosphate	Carbohydrate	Pentose Phosphate Pathway	37288	GC/MS	100002179	1935	357.2				C00199
295	S-adenosylhomocysteine (SAH)	Amino Acid	Methionine, Cysteine, SAM and Taurine Metabolism	42382	LC/MS Neg	197	1832.4	383.114	979-92-0	439155	16788012	C00021	HMDB00939
294	S-adenosylmethionine (SAM)	Amino Acid	Methionine, Cysteine, SAM and Taurine Metabolism	15915	LC/MS Pos	1263	670	399.145	24346-00-7;86867-01-8;86867-0108	34755		C00019	HMDB01185
378	S-lactoylglutathione	Amino Acid	Glutathione Metabolism	15731	LC/MS Neg	1343	1248	378.098	54398-03-7	440018	1053	C03451	HMDB01066
307	S-methylcysteine	Amino Acid	Methionine, Cysteine, SAM and Taurine Metabolism	39592	LC/MS Pos	100002749	848	119.016	1187-84-4	24417	22826		HMDB02108
377	S-methylglutathione	Amino Acid	Glutathione Metabolism	33944	LC/MS Pos	100001259	1600	322.107	2922-56-7	3605667	2841309	C11347
3250	salicylate	Xenobiotics	Drug	1515	LC/MS Neg	501	2195	137.024	69-72-7	338	331	C00805	HMDB01895
4	sarcosine (N-Methylglycine)	Amino Acid	Glycine, Serine and Threonine Metabolism	1516	GC/MS	1023	1182.9	116	107-97-1	1088	1057	C00213	HMDB00271
1359	scyllo-inositol	Lipid	Inositol Metabolism	32379	GC/MS	100001215	1893.8	318.2	488-59-5	892	10254646	C06153	HMDB06088
9	serine	Amino Acid	Glycine, Serine and Threonine Metabolism	1648	LC/MS Pos	503	676.7	106.05	56-45-1	5951	5736	C00065	HMDB00187
871	sorbitol	Carbohydrate	Fructose, Mannose and Galactose Metabolism	15053	GC/MS	506	1843	319.1	6706-59-8	5780	96680	C00794	HMDB00247
361	spermidine	Amino Acid	Polyamine Metabolism	485	LC/MS Pos	50	533.5	146.165	124-20-9	1102	1071	C00315	HMDB01257
360	spermine	Amino Acid	Polyamine Metabolism	603	LC/MS Pos	507	500.4	203.223	71-44-3	1103	1072	C00750	HMDB01256
1599	squalene	Lipid	Sterol	1518	GC/MS	508	2205	69	111-02-4	638072	553635	C00751	HMDB00256
2971	stachydrine	Xenobiotics	Food Component/Plant	34384	LC/MS Pos	100001296	838.7	144.102	4136-37-2	115244	103115	C10172	HMDB04827
988	stearate (18:0)	Lipid	Long Chain Fatty Acid	1358	LC/MS Neg	439	5872	283.264	57-11-4	5281	5091	C01530	HMDB00827
1015	stearidonate (18:4n3)	Lipid	Polyunsaturated Fatty Acid (n3 and n6)	33969	LC/MS Neg	100001229	5395	275.202	111174-40-4	5312508	4471933	C16300	HMDB06547
1345	stearoyl ethanolamide	Lipid	Endocannabinoid	38625	LC/MS Pos	100002254	5956.9	328.321	111-57-9	27902	25958		HMDB13078
1566	stearoyl sphingomyelin	Lipid	Sphingolipid Metabolism	19503	LC/MS Polar	1538	979	775.597	85187-10-6;85187-10-6	6453725	4956085	C00550	HMDB01348
1505	stearoyl-arachidonoyl-glycerophosphocholine (2)*	Lipid	Lysolipid	48393	LC/MS Polar	100006158	790	854.591
1515	stearoyl-arachidonoyl-glycerophosphoethanolamine (1)*	Lipid	Lysolipid	48497	LC/MS Polar	100006316	750	766.539
1506	stearoyl-arachidonoyl-glycerophosphoinositol (1)*	Lipid	Lysolipid	48282	LC/MS Polar	100006136	897	885.549
1523	stearoyl-arachidonoyl-glycerophosphoinositol (2)*	Lipid	Lysolipid	48847	LC/MS Polar	100006156	850	885.549
1512	stearoyl-linoleoyl-glycerophosphocholine (1)*	Lipid	Lysolipid	48387	LC/MS Polar	100006154	792	830.592
1517	stearoyl-linoleoyl-glycerophosphoethanolamine (1)*	Lipid	Lysolipid	48499	LC/MS Polar	100006320	750	742.539
1516	stearoyl-oleoyl-glycerophosphoserine (1)*	Lipid	Lysolipid	48494	LC/MS Polar	100006312	901	788.545
1208	stearoylcarnitine	Lipid	Fatty Acid Metabolism(Acyl Carnitine)	34409	LC/MS Pos	100001391	5256	428.373	18822-91-8	6426855	21233653		HMDB00848
954	succinate	Energy	TCA Cycle	1437	LC/MS Polar	252	3149	117.019	110-15-6	1110	1078	C00042	HMDB00254
953	succinylcarnitine	Energy	TCA Cycle	37058	LC/MS Pos	100001948	1419	262.129
314	taurine	Amino Acid	Methionine, Cysteine, SAM and Taurine Metabolism	2125	LC/MS Pos	512	692	126.022	107-35-7	1123	1091	C00245	HMDB00251
2661	theobromine	Xenobiotics	Xanthine Metabolism	18392	LC/MS Pos	100000445	2151	181.072	83-67-0	5429	5236	C07480	HMDB02825
2662	theophylline	Xenobiotics	Xanthine Metabolism	18394	LC/MS Neg	100000437	2356.9	179.057	58-55-9	2153	2068	C07130	HMDB01889
2582	thiamin diphosphate	Cofactors and Vitamins	Thiamine Metabolism	35670	LC/MS Neg	522	1195.1	423.03	154-87-0	1132	8715	C00068	HMDB01372
2530	threonate	Cofactors and Vitamins	Ascorbate and Aldarate Metabolism	27738	LC/MS Polar	100001022	2384	135.03	70753-61-6	151152	133224	C01620	HMDB00943
14	threonine	Amino Acid	Glycine, Serine and Threonine Metabolism	1284	LC/MS Pos	564	701.5	120.066	72-19-5	6288	6051	C00188	HMDB00167
2485	thymidine	Nucleotide	Pyrimidine Metabolism, Thymine containing	2183	LC/MS Neg	872	1963.7	241.083	50-89-5	5789	5585	C00214	HMDB00273
270	tiglyl carnitine	Amino Acid	Leucine, Isoleucine and Valine Metabolism	35428	LC/MS Pos	100001597	2354	244.154	64191-86-2	22833596	17216200		HMDB02366
342	trans-4-hydroxyproline	Amino Acid	Urea cycle; Arginine and Proline Metabolism	32306	LC/MS Pos	1001	685	132.066	51-35-4	5810	5605	C01157	HMDB00725
59	trans-urocanate	Amino Acid	Histidine Metabolism	607	LC/MS Pos	537	1125.4	139.05	104-98-3	736715	643824	C00785	HMDB00301
2512	trigonelline (N'-methylnicotinate)	Cofactors and Vitamins	Nicotinate and Nicotinamide Metabolism	32401	LC/MS Pos	100001092	771.8	138.055	535-83-1	5570	5369	C01004	HMDB00875
191	tryptophan	Amino Acid	Tryptophan Metabolism	54	LC/MS Neg	565	2291	203.083	73-22-3	6305	6066	C00078	HMDB00929
225	tryptophan betaine	Amino Acid	Tryptophan Metabolism	37097	LC/MS Pos	100001743	2466	247.144	20671-76-5	442106	390633	C09213	HMDB61115
110	tyrosine	Amino Acid	Phenylalanine and Tyrosine Metabolism	1299	LC/MS Pos	815	1516.3	182.081	60-18-4	6057	5833	C00082	HMDB00158
899	UDP-galactose	Carbohydrate	Nucleotide Sugar	15860	LC/MS Polar	100000298	4000	565.048	2956-16-3;91183-98-1;137868-52-1	18068	17069	C00052	HMDB00302
895	UDP-glucose	Carbohydrate	Nucleotide Sugar	32344	LC/MS Polar	1096	3950	565.048	117756-22-6	8629	8308	C00029	HMDB00286
900	UDP-glucuronate	Carbohydrate	Nucleotide Sugar	2763	LC/MS Neg	1097	588	579.027	28053-08-9;63700-19-6	17473	16522	C00167	HMDB00935
905	UDP-N-acetylgalactosamine	Carbohydrate	Nucleotide Sugar	18396	LC/MS Polar	1257	3730	606.074	108320-87-2	439185	1134	C00203	HMDB00304
904	UDP-N-acetylglucosamine	Carbohydrate	Nucleotide Sugar	35162	LC/MS Polar	1249	3708.7	606.074	91183-98-1	445675	17215931	C00043	HMDB00290
975	undecanoate (11:0)	Lipid	Medium Chain Fatty Acid	12067	LC/MS Neg	889	5219.2	185.155	334-48-5	8180	7888	C17715	HMDB00947
2366	urate	Nucleotide	Purine Metabolism, (Hypo)Xanthine/Inosine containing	1604	LC/MS Neg	1134	757.1	167.021	69-93-2;120K5305	1175		C00366	HMDB00289
322	urea	Amino Acid	Urea cycle; Arginine and Proline Metabolism	1670	LC/MS Pos	533	739	121.072	57-13-6	1176	1143	C00086	HMDB00294
2444	uridine	Nucleotide	Pyrimidine Metabolism, Uracil containing	606	LC/MS Neg	535	1457.6	243.062	58-96-8	6029	5807	C00299	HMDB00296
2438	uridine 5'-diphosphate (UDP)	Nucleotide	Pyrimidine Metabolism, Uracil containing	5345	LC/MS Neg	870	599.5	402.995	21931-53-3	6031	5809	C00015	HMDB00295
2437	uridine 5'-triphosphate (UTP)	Nucleotide	Pyrimidine Metabolism, Uracil containing	33448	LC/MS Neg	871	572	482.961	19817-92-6	6133	5903	C00075	HMDB00285
2440	uridine monophosphate (5' or 3')	Nucleotide	Pyrimidine Metabolism, Uracil containing	39892	LC/MS Pos	100003366	1100	325.043	58-97-9	6030			HMDB00288
969	valerate	Lipid	Short Chain Fatty Acid	33443	LC/MS Neg	1136	1718	101.061	109-52-4	7991	7701	C00803	HMDB00892
1197	valerylcarnitine	Lipid	Fatty Acid Metabolism(Acyl Carnitine)	34406	LC/MS Pos	100001394	2555	246.17		6426903	4932322		HMDB13128
1186	valerylglycine	Lipid	Fatty Acid Metabolism(Acyl Glycine)	36768	LC/MS Neg	100001451	2071	158.082	24003-66-5	4737557	3924818		HMDB00927
276	valine	Amino Acid	Leucine, Isoleucine and Valine Metabolism	1649	LC/MS Pos	566	1042.1	118.086	72-18-4	6287	6050	C00183	HMDB00883
700	valylglutamine	Peptide	Dipeptide	42079	LC/MS Pos	100003640	1100	246.145	42854-54-6	5253209	4419671
704	valylleucine	Peptide	Dipeptide	39994	LC/MS Pos	100003210	2562	231.17	22906-55-4	352039	312586
2359	xanthine	Nucleotide	Purine Metabolism, (Hypo)Xanthine/Inosine containing	3147	LC/MS Pos	1004	1449.7	153.041	69-89-6	1188	1151	C00385	HMDB00292

## Sheet: Supplementary_table_S4
Supplementary Table S4: Urine metabolites identification data
PATHWAY_SORTORDER	BIOCHEMICAL	SUPER_PATHWAY	SUB_PATHWAY	COMP_ID	PLATFORM	CHEMICAL_ID	RI	MASS	CAS	PUBCHEM	CHEMSPIDER	KEGG	Group HMDB_ID
3454	1,2,3-benzenetriol sulfate (1)	Xenobiotics	Chemical	48761	LC/MS Neg	100006373	1453	204.981
3451	1,2,3-benzenetriol sulfate (2)	Xenobiotics	Chemical	48762	LC/MS Neg	100006374	1709	204.981
3328	1,2-propanediol	Xenobiotics	Chemical	38002	GC/MS	100001176	1041	117	57-55-6	1030	13835224	C00583	HMDB01881
2668	1,3,7-trimethylurate	Xenobiotics	Xanthine Metabolism	34404	LC/MS Neg	100001397	1985	209.068	5415-44-1	79437	71754	C16361	HMDB02123
2665	1,3-dimethylurate	Xenobiotics	Xanthine Metabolism	32391	LC/MS Pos	100001106	2155.8	197.067	944-73-0	70346	63527		HMDB01857
761	1,5-anhydroglucitol (1,5-AG)	Carbohydrate	Glycolysis, Gluconeogenesis, and Pyruvate Metabolism	20675	LC/MS Neg	100000580	802	163.061	154-58-5	64960		C07326	HMDB02712
2767	1,6-anhydroglucose	Xenobiotics	Food Component/Plant	21049	GC/MS	100000939	1679.5	204.1	498-07-7	2724705	9587432		HMDB00640
2666	1,7-dimethylurate	Xenobiotics	Xanthine Metabolism	34400	LC/MS Neg	100001399	1578.6	195.052	33868-03-0	91611	82720	C16356	HMDB11103
3341	1-(3-aminopropyl)-2-pyrrolidone	Xenobiotics	Chemical	40506	LC/MS Pos	100003263	1350	143.118	7663-77-6	82111	74106
2739	1-methyl-beta-carboline-3-carboxylic acid	Xenobiotics	Food Component/Plant	43449	LC/MS Pos	100004434	3272	227.082	22329-38-0	5406157	4546099
2381	1-methyladenine	Nucleotide	Purine Metabolism, Adenine containing	1527	LC/MS Pos	54	940	150.077	5142-22-3	78821	71157	C02216	HMDB11599
54	1-methylhistidine	Amino Acid	Histidine Metabolism	30460	LC/MS Neg	100001051	1227	168.078	332-80-9	92105	83153	C01152	HMDB00001
69	1-methylimidazoleacetate	Amino Acid	Histidine Metabolism	32350	LC/MS Pos	100001208	833	141.066	2625-49-2	75810	68319	C05828	HMDB02820
2507	1-methylnicotinamide	Cofactors and Vitamins	Nicotinate and Nicotinamide Metabolism	27665	LC/MS Pos	55	691.3	137.071	1005-24-9	10129985	8305504	C02918	HMDB00699
2663	1-methylurate	Xenobiotics	Xanthine Metabolism	34395	LC/MS Pos	100001400	1860.5	183.051	708-79-2	69726	62926	C16359	HMDB03099
2669	1-methylxanthine	Xenobiotics	Xanthine Metabolism	34389	LC/MS Pos	100001405	2004.6	167.056	6136-37-4	80220	72464	C16358	HMDB10738
1752	11-ketoetiocholanolone glucuronide	Lipid	Steroid	47135	LC/MS Neg	100005402	4280	479.229	17181-16-7
1763	11-ketoetiocholanolone sulfate	Lipid	Steroid	38167	LC/MS Neg	100002125	4420	383.153
1806	12-dehydrocholate	Lipid	Secondary Bile Acid Metabolism	44644	LC/MS Neg	100001072	4871	405.265	2458-08-4;2458-08-4	94235	85044		HMDB00400
1695	16a-hydroxy DHEA 3-sulfate	Lipid	Steroid	38168	LC/MS Neg	100002126	4240	383.153
1756	17alpha-hydroxypregnanolone glucuronide	Lipid	Steroid	47403	LC/MS Neg	100005418	5071.9	509.276
2400	2'-deoxyadenosine	Nucleotide	Purine Metabolism, Adenine containing	1553	LC/MS Pos	211	1643	252.109	16373-93-6	13730	13135	C00559	HMDB00101
2429	2'-deoxyguanosine	Nucleotide	Purine Metabolism, Guanine containing	1411	LC/MS Neg	348	1751	266.089	961-07-9	187790	163230	C00330	HMDB00085
2770	2,3-dihydroxyisovalerate	Xenobiotics	Food Component/Plant	38276	LC/MS Polar	100002417	1050	133.051	1756-18-9	677	657	C04039	HMDB12141
2620	2,4,6-trihydroxybenzoate	Xenobiotics	Benzoate Metabolism	35892	LC/MS Neg	100001718	1574	169.014	83-30-7	66520	59891
2773	2,8-quinolinediol	Xenobiotics	Food Component/Plant	42975	LC/MS Pos	100004206	3314	162.055	15450-76-7	97250	87777	C06342
3290	2-acetamidophenol sulfate	Xenobiotics	Drug	48580	LC/MS Neg	100006190	2251	230.013	40712-60-5	181671	158023
78	2-aminoadipate	Amino Acid	Lysine Metabolism	6146	LC/MS Pos	381	793.3	162.076	542-32-5;1118-90-7	469	456	C00956	HMDB00510
302	2-aminobutyrate	Amino Acid	Methionine, Cysteine, SAM and Taurine Metabolism	1577	GC/MS	1128	1215.7	130	1492-24-6	439691	388757	C02261	HMDB00650
1151	2-aminoheptanoate	Lipid	Fatty Acid, Amino	43761	LC/MS Pos	100004542	2530	146.118	1115-90-8	227939	198338
1156	2-aminooctanoate	Lipid	Fatty Acid, Amino	43343	LC/MS Pos	100004227	3355	160.133	644-90-6	69522	62727		HMDB00991
3355	2-aminophenol sulfate	Xenobiotics	Chemical	43266	LC/MS Neg	100004322	1677	188.002		181670	158022		HMDB61116
2639	2-ethylphenylsulfate	Xenobiotics	Benzoate Metabolism	36847	LC/MS Neg	100001809	3416	201.023
273	2-hydroxy-3-methylvalerate	Amino Acid	Leucine, Isoleucine and Valine Metabolism	36746	LC/MS Neg	100001541	1800	131.071	488-15-3	164623	144317		HMDB00317
3071	2-hydroxyacetaminophen sulfate*	Xenobiotics	Drug	33173	LC/MS Neg	100001791	1674	246.008
1101	2-hydroxyadipate	Lipid	Fatty Acid, Dicarboxylate	31934	LC/MS Polar	100001153	3000	161.046	18294-85-4	193530	167943	C02360	HMDB00321
303	2-hydroxybutyrate (AHB)	Amino Acid	Methionine, Cysteine, SAM and Taurine Metabolism	21044	GC/MS	100000933	1169.4	131	3347-90-8	440864	389701	C05984	HMDB00008
1098	2-hydroxyglutarate	Lipid	Fatty Acid, Dicarboxylate	37253	GC/MS	100002070	1576	247	40951-21-1	43	42	C02630	HMDB00606
2601	2-hydroxyhippurate (salicylurate)	Xenobiotics	Benzoate Metabolism	18281	LC/MS Pos	1869	3246	196.06	487-54-7	10253	9835	C07588	HMDB00840
3082	2-hydroxyibuprofen	Xenobiotics	Drug	43330	LC/MS Pos	100004169	4470	205.122	51146-55-5
3376	2-hydroxyisobutyrate	Xenobiotics	Chemical	22030	GC/MS	100000748	1107.5	130.9	594-61-6	11671	11181		HMDB00729
1223	2-hydroxyoctanoate	Lipid	Fatty Acid, Monohydroxy	22036	LC/MS Neg	100000743	3736.8	159.103	617-73-2	94180	84994		HMDB02264
179	2-hydroxyphenylacetate	Amino Acid	Phenylalanine and Tyrosine Metabolism	1432	LC/MS Polar	235	858.6	151.04	614-75-5	11970	11476	C05852	HMDB00669
2776	2-isopropylmalate	Xenobiotics	Food Component/Plant	15667	LC/MS Neg	100000409	725	175.061	3237-44-3	77	76	C02504	HMDB00402
3078	2-methoxyacetaminophen glucuronide*	Xenobiotics	Drug	33161	LC/MS Neg	100001795	1633	356.099
3072	2-methoxyacetaminophen sulfate*	Xenobiotics	Drug	47031	LC/MS Neg	100001793	1949	260.023
268	2-methylbutyrylcarnitine (C5)	Amino Acid	Leucine, Isoleucine and Valine Metabolism	45095	LC/MS Pos	100001509	2465	246.17	31023-25-3	6426901	4932320		HMDB00378
269	2-methylbutyrylglycine	Amino Acid	Leucine, Isoleucine and Valine Metabolism	31928	LC/MS Neg	100001155	1884.2	158.082	52320-67-9	193872	168243		HMDB00339
963	2-methylcitrate	Energy	TCA Cycle	37483	GC/MS	90	1778	287.1	6061-96-7	439681	4573953	C02225	HMDB00379
1166	2-methylmalonyl carnitine	Lipid	Fatty Acid Synthesis	35482	LC/MS Pos	100001596	1552.7	262.129	149181-64-6	53481628	21403178		HMDB13133
3452	2-methyoxyresorcinol sulfate	Xenobiotics	Chemical	48445	LC/MS Neg	100006184	1863	218.997	1446269-78-8
2777	2-oxindole-3-acetate	Xenobiotics	Food Component/Plant	40479	LC/MS Pos	100003109	3208	192.066	2971-31-5	3080590	2338343
3342	2-oxo-1-pyrrolidinepropionate	Xenobiotics	Chemical	40452	LC/MS Pos	100003265	2084	158.081	77191-38-9	3146688	2398914
2684	2-piperidinone	Xenobiotics	Food Component/Plant	43400	LC/MS Pos	100004295	2047	100.076	675-20-7	12665	12144
3335	2-pyrrolidinone	Xenobiotics	Chemical	31675	LC/MS Pos	100001081	1651.8	86.06	616-45-5	12025	11530		HMDB02039
1655	21-hydroxypregnenolone disulfate	Lipid	Steroid	46115	LC/MS Neg	100001999	3935	245.067	1164-98-3	134595	118625	C05485	HMDB04026
143	3,4-dihydroxyphenylacetate	Amino Acid	Phenylalanine and Tyrosine Metabolism	18296	LC/MS Neg	100000449	1029.9	123.045	102-32-9	547	532	C01161	HMDB01336
190	3,4-dihydroxyphenylacetate sulfate	Amino Acid	Phenylalanine and Tyrosine Metabolism	48736	LC/MS Neg	100006254	800	246.992	38339-04-7	193283	167724
2783	3,5-dihydroxybenzoic acid	Xenobiotics	Food Component/Plant	37508	LC/MS Neg	100002054	785.4	153.019	99-10-5	7424	7146		HMDB13677
2667	3,7-dimethylurate	Xenobiotics	Xanthine Metabolism	34399	LC/MS Neg	100001398	1418.2	195.052	13087-49-5	83126	74994	C16360	HMDB01982
169	3-(3-hydroxyphenyl)propionate	Amino Acid	Phenylalanine and Tyrosine Metabolism	35635	LC/MS Neg	100001624	1980	165.056	621-54-5	91	89	C11457	HMDB00375
120	3-(4-hydroxyphenyl)lactate	Amino Acid	Phenylalanine and Tyrosine Metabolism	32197	LC/MS Neg	240	1379	181.051	6482-98-0	9378	9010	C03672	HMDB00755
3073	3-(cystein-S-yl)acetaminophen*	Xenobiotics	Drug	34365	LC/MS Pos	100001797	1963	271.075		5233914	4403253
3074	3-(N-acetyl-L-cystein-S-yl) acetaminophen	Xenobiotics	Drug	45721	LC/MS Pos	2048	2595	313.085	52372-86-8	83967	75765
2489	3-aminoisobutyrate	Nucleotide	Pyrimidine Metabolism, Thymine containing	1566	GC/MS	1114	1252.2	102	10569-72-9;214139-20-5	64956	58481	C05145	HMDB03911
1120	3-carboxy-4-methyl-5-propyl-2-furanpropanoate (CMPF)	Lipid	Fatty Acid, Dicarboxylate	31787	LC/MS Pos	100001178	5011	241.107	86879-39-2	123979	110498		HMDB61112
2640	3-ethylphenylsulfate	Xenobiotics	Benzoate Metabolism	36848	LC/MS Neg	100001808	3530	201.023				C14386
274	3-hydroxy-2-ethylpropionate	Amino Acid	Leucine, Isoleucine and Valine Metabolism	32397	LC/MS Polar	100001170	1443.3	117.056	4374-62-3	188979	164207		HMDB00396
272	3-hydroxy-2-methylbutyrate	Amino Acid	Leucine, Isoleucine and Valine Metabolism	46071	LC/MS Pos	100001171	2243	119.07	473-86-9	160471	141015		HMDB00354
1591	3-hydroxy-3-methylglutarate	Lipid	Mevalonate Metabolism	531	LC/MS Polar	112	2700	161.046	503-49-1	1662	4573695	C03761	HMDB00355
206	3-hydroxyanthranilate	Amino Acid	Tryptophan Metabolism	32353	LC/MS Pos	243	2280	154.05	548-93-6	86	84	C00632	HMDB01476
1219	3-hydroxybutyrate (BHBA)	Lipid	Ketone Bodies	542	LC/MS Polar	254	1443.3	103.04	625-72-9	441	428	C01089	HMDB00357
2822	3-hydroxycinnamate (m-coumarate)	Xenobiotics	Food Component/Plant	20698	LC/MS Neg	100000842	1960	163.04	588-30-7;14755-02-3	637541	553147	C12621	HMDB01713
3029	3-hydroxycinnamate sulfate	Xenobiotics	Food Component/Plant	48409	LC/MS Neg	100006094	1338	242.997	86321-30-4	6443141	4947175
2679	3-hydroxycotinine glucuronide	Xenobiotics	Tobacco Metabolite	43470	LC/MS Neg	100004494	1745	367.115	132929-88-5	183115	159230
2602	3-hydroxyhippurate	Xenobiotics	Benzoate Metabolism	39600	LC/MS Neg	100002122	1687	194.046	1637-75-8	450268	396603		HMDB06116
2787	3-hydroxyindolin-2-one	Xenobiotics	Food Component/Plant	42561	LC/MS Neg	100003823	2695	148.04	61-71-2	6097	5872	C11130
3455	3-hydroxyindolin-2-one sulfate	Xenobiotics	Chemical	48419	LC/MS Neg	100006103	2082	227.997
282	3-hydroxyisobutyrate	Amino Acid	Leucine, Isoleucine and Valine Metabolism	1549	LC/MS Polar	111	1619.1	103.04	2068-83-9	87	10140307	C06001	HMDB00336
205	3-hydroxykynurenine	Amino Acid	Tryptophan Metabolism	22110	LC/MS Pos	100000986	1462	225.087	2147-61-7	89	87	C02794	HMDB00732
1230	3-hydroxyoctanoate	Lipid	Fatty Acid, Monohydroxy	22001	LC/MS Neg	100000773	3446	159.103	88930-08-9	26613	24791		HMDB01954
107	3-hydroxyphenylacetate	Amino Acid	Phenylalanine and Tyrosine Metabolism	1413	LC/MS Neg	114	1576.8	151.04	621-37-4	12122	5323739	C05593	HMDB00440
341	3-hydroxyproline	Amino Acid	Urea cycle; Arginine and Proline Metabolism	38635	GC/MS	100002089	1532.5	230.1	4298-05-9;4298-08-2	559314	486216	C05147	HMDB02113
1228	3-hydroxypropanoate	Lipid	Fatty Acid, Monohydroxy	1556	LC/MS Polar	115	1845	89.0244	503-66-2	68152	4573601	C01013	HMDB00700
3453	3-hydroxypyridine sulfate	Xenobiotics	Chemical	48448	LC/MS Neg	100006098	1595.5	173.987	1955-23-3		16232314
3094	3-hydroxyquinine	Xenobiotics	Drug	43496	LC/MS Pos	100002410	2375	341.186	78549-61-8	441264	138373	C07344	HMDB01091
1232	3-hydroxysebacate	Lipid	Fatty Acid, Monohydroxy	31943	LC/MS Pos	100001145	3598.5	219.123	73141-46-5	3017884	2285525		HMDB00350
1229	3-hydroxysuberate	Lipid	Fatty Acid, Monohydroxy	31936	LC/MS Pos	100001143	2535	191.091	73141-47-6	22328017	13498677		HMDB00325
200	3-indoxyl sulfate	Amino Acid	Tryptophan Metabolism	27672	LC/MS Neg	100000467	2222.2	212.002	2642-37-7	10258	9840		HMDB00682
141	3-methoxytyramine	Amino Acid	Phenylalanine and Tyrosine Metabolism	38630	LC/MS Pos	118	1721	168.102	1477-68-5	1669	1606	C05587	HMDB00022
142	3-methoxytyramine sulfate	Amino Acid	Phenylalanine and Tyrosine Metabolism	44618	LC/MS Neg	100004634	1722	246.044			21233674
140	3-methoxytyrosine	Amino Acid	Phenylalanine and Tyrosine Metabolism	12017	LC/MS Pos	1342	1771	212.092	300-48-1	1670	8948		HMDB01434
2629	3-methyl catechol sulfate (1)	Xenobiotics	Benzoate Metabolism	46165	LC/MS Neg	100004112	2790	203.002
2630	3-methyl catechol sulfate (2)	Xenobiotics	Benzoate Metabolism	46164	LC/MS Neg	100004110	2860	203.002
279	3-methyl-2-oxobutyrate	Amino Acid	Leucine, Isoleucine and Valine Metabolism	44526	LC/MS Neg	100000936	1465	115.04	3715-29-5	49	48	C00141	HMDB00019
267	3-methyl-2-oxovalerate	Amino Acid	Leucine, Isoleucine and Valine Metabolism	15676	LC/MS Neg	100000036	2064.2	129.056	1460-34-0;51829-07-3	47	46	C00671	HMDB03736
1102	3-methyladipate	Lipid	Fatty Acid, Dicarboxylate	36749	LC/MS Polar	100001765	2865	159.066	3058-01-03	12292	11789		HMDB00555
245	3-methylcrotonylglycine	Amino Acid	Leucine, Isoleucine and Valine Metabolism	31940	LC/MS Pos	100001149	2573.6	158.081	33008-07-0	169485	148224		HMDB00459
2471	3-methylcytidine	Nucleotide	Pyrimidine Metabolism, Cytidine containing	35132	LC/MS Pos	100001466	1325	258.108	21028-20-6	159649	9164190
250	3-methylglutaconate	Amino Acid	Leucine, Isoleucine and Valine Metabolism	38667	LC/MS Pos	100002458	2600.9	127.039	5746-90-7	1551553	1267861		HMDB00522
252	3-methylglutarate	Amino Acid	Leucine, Isoleucine and Valine Metabolism	1557	GC/MS	1122	1450.9	275.1	626-51-7	12284	11781		HMDB00752
83	3-methylglutarylcarnitine (1)	Amino Acid	Lysine Metabolism	46547	LC/MS Pos	100005849	1870	290.16		128145	113619		HMDB00552
84	3-methylglutarylcarnitine (2)	Amino Acid	Lysine Metabolism	46548	LC/MS Pos	100005850	1960	290.16		128145	113619		HMDB00552
55	3-methylhistidine	Amino Acid	Histidine Metabolism	15677	LC/MS Neg	100000042	906.3	168.078	368-16-1	64969	58494	C01152	HMDB00479
2674	3-methylurate*	Xenobiotics	Xanthine Metabolism	48252	LC/MS Neg	100004049	1024	181.037	605-99-2	11804	11311
2670	3-methylxanthine	Xenobiotics	Xanthine Metabolism	32445	LC/MS Pos	100001108	1911.6	167.056	1076-22-8	70639	63805	C16357	HMDB01886
846	3-sialyllactose	Carbohydrate	Disaccharides and Oligosaccharides	40424	LC/MS Neg	100003408	730	632.204	35890-38-1	123914	110445		HMDB00825
2460	3-ureidopropionate	Nucleotide	Pyrimidine Metabolism, Uracil containing	3155	LC/MS Pos	1053	1090.6	133.061	462-88-4	111	109	C02642	HMDB00026
165	3-[3-(sulfooxy)phenyl]propanoic acid	Amino Acid	Phenylalanine and Tyrosine Metabolism	45415	LC/MS Neg	100005391	1294	245.013	86321-32-6	187488	162993
366	4-acetamidobutanoate	Amino Acid	Polyamine Metabolism	1558	LC/MS Pos	1113	1721.3	146.081	3025-96-5	18189	17180	C02946	HMDB03681
3076	4-acetamidophenol	Xenobiotics	Drug	12032	LC/MS Pos	1383	2208.2	152.071	103-90-2	1983	1906	C06804	HMDB01859
3077	4-acetamidophenylglucuronide	Xenobiotics	Drug	15736	LC/MS Neg	100000043	1400	326.088	120595-80-4	83944	3239926		HMDB10316
3075	4-acetaminophen sulfate	Xenobiotics	Drug	37475	LC/MS Neg	2049	1792	230.013	10066-90-7;32113-41-0	83939	75741	C06804	HMDB59911
3096	4-acetylphenol sulfate	Xenobiotics	Drug	44620	LC/MS Neg	100000711	2375	215.002		4684006	3872009
2992	4-allylphenol sulfate	Xenobiotics	Food Component/Plant	37181	LC/MS Neg	100001868	3805	213.023
1705	4-androsten-3alpha,17alpha-diol monosulfate (2)	Lipid	Steroid	37207	LC/MS Neg	100002026	4712	369.174
1710	4-androsten-3beta,17beta-diol disulfate (1)	Lipid	Steroid	37202	LC/MS Neg	100001992	3740	224.062		10634		C04295	HMDB03818
1711	4-androsten-3beta,17beta-diol disulfate (2)	Lipid	Steroid	37203	LC/MS Neg	100001994	4065	224.062		10634		C04295	HMDB03818
1701	4-androsten-3beta,17beta-diol monosulfate (1)	Lipid	Steroid	37211	LC/MS Neg	100002028	4547	369.174	521-17-5				HMDB03818
1702	4-androsten-3beta,17beta-diol monosulfate (2)	Lipid	Steroid	37210	LC/MS Neg	100002029	4500	369.174
2641	4-ethylphenylsulfate	Xenobiotics	Benzoate Metabolism	36099	LC/MS Neg	100001756	3580	201.023	123-07-9			C13637
371	4-guanidinobutanoate	Amino Acid	Guanidino and Acetamido Metabolism	15681	LC/MS Pos	100000096	1150	146.092	463-003;463-00-3	500	486	C01035	HMDB03464
2618	4-hydroxybenzoate	Xenobiotics	Benzoate Metabolism	21133	LC/MS Neg	100000862	820	137.024	99-96-7	135	132	C00156	HMDB00500
115	4-hydroxycinnamate	Amino Acid	Phenylalanine and Tyrosine Metabolism	36770	LC/MS Pos	100001675	3375.1	165.055	501-98-4	637542	553148	C00811	HMDB02035
189	4-hydroxycinnamate sulfate	Amino Acid	Phenylalanine and Tyrosine Metabolism	48410	LC/MS Neg	100006095	1000	242.997	376374-66-2	6070438	4797737
3143	4-hydroxycoumarin	Xenobiotics	Drug	37445	LC/MS Neg	100002049	2470	161.024	1076-38-6	54682930	10254753	C20414
2603	4-hydroxyhippurate	Xenobiotics	Benzoate Metabolism	35527	LC/MS Neg	100001423	1475	194.046	2482-25-9	151012	133104		HMDB13678
2607	4-hydroxymandelate	Xenobiotics	Benzoate Metabolism	1568	LC/MS Pos	1115	1594.9	151.039	7198-10-9;184901-84-6	328	321	C03198	HMDB00822
106	4-hydroxyphenylacetate	Amino Acid	Phenylalanine and Tyrosine Metabolism	541	LC/MS Neg	144	1361.1	151.04	156-38-7	127	3881560	C00642	HMDB00020
119	4-hydroxyphenylpyruvate	Amino Acid	Phenylalanine and Tyrosine Metabolism	1669	LC/MS Neg	1141	1690.1	179.035	156-39-8	979	954	C01179	HMDB00707
70	4-imidazoleacetate	Amino Acid	Histidine Metabolism	32349	LC/MS Pos	100001207	757	127.05	645-65-8	96215	86856	C02835	HMDB02024
238	4-methyl-2-oxopentanoate	Amino Acid	Leucine, Isoleucine and Valine Metabolism	22116	LC/MS Neg	100000551	2170	129.056	816-66-0	70	69	C00233	HMDB00695
2631	4-methylcatechol sulfate	Xenobiotics	Benzoate Metabolism	46146	LC/MS Neg	100004111	2665	203.002
1109	4-octenedioate	Lipid	Fatty Acid, Dicarboxylate	31941	LC/MS Pos	100001152	3409.1	137.06	38561-68-1	11805205	9979870		HMDB04982
2459	4-ureidobutyrate	Nucleotide	Pyrimidine Metabolism, Uracil containing	22118	LC/MS Pos	100000718	1458	147.076	2609-10-01	1571307	1278628
3020	4-vinylguaiacol sulfate	Xenobiotics	Food Component/Plant	48442	LC/MS Neg	100006126	3354	229.018
2642	4-vinylphenol sulfate	Xenobiotics	Benzoate Metabolism	36098	LC/MS Neg	100001755	3320	199.007	2628-17-3	6426766	4932200	C05627	HMDB04072
2487	5,6-dihydrothymine	Nucleotide	Pyrimidine Metabolism, Thymine containing	1418	LC/MS Pos	158	1654.2	129.066	696-04-8	93556	84456	C00906	HMDB00079
2454	5,6-dihydrouracil	Nucleotide	Pyrimidine Metabolism, Uracil containing	1559	LC/MS Pos	1125	1148	115.05	504-07-4	649	629	C00429	HMDB00076
2672	5-acetylamino-6-amino-3-methyluracil	Xenobiotics	Xanthine Metabolism	34424	LC/MS Pos	100001403	1240	199.083	19893-78-8	88299	79659	C16366	HMDB04400
2673	5-acetylamino-6-formylamino-3-methyluracil	Xenobiotics	Xanthine Metabolism	34401	LC/MS Pos	100001402	1570	227.077	85438-96-6	108214	97287	C16365	HMDB11105
92	5-aminovalerate	Amino Acid	Lysine Metabolism	18319	GC/MS	100000454	1620.8	174	660-88-8	138	135	C00431	HMDB03355
1238	5-hydroxyhexanoate	Lipid	Fatty Acid, Monohydroxy	31938	LC/MS Neg	100001148	1267	131.071	44843-89-2	170748	149280		HMDB00525
216	5-hydroxyindoleacetate	Amino Acid	Tryptophan Metabolism	437	LC/MS Neg	71	1510.2	190.051	54-16-0	1826	1760	C05635	HMDB00763
178	5-hydroxymethyl-2-furoic acid	Amino Acid	Phenylalanine and Tyrosine Metabolism	42040	LC/MS Neg	100003954	962	141.019	6338-41-6	80642	72827	C20448	HMDB02432
212	5-hydroxytryptophan	Amino Acid	Tryptophan Metabolism	32227	LC/MS Pos	449	1720	221.092	4350-09-08	144	141	C00643	HMDB00504
362	5-methylthioadenosine (MTA)	Amino Acid	Polyamine Metabolism	1419	LC/MS Pos	212	2444.9	298.097	2457-80-9	439176	388321	C00170	HMDB01173
2447	5-methyluridine (ribothymidine)	Nucleotide	Pyrimidine Metabolism, Uracil containing	35136	LC/MS Neg	100001446	1778.1	257.078	1463-10-1	445408	393058		HMDB00884
381	5-oxoproline	Amino Acid	Glutathione Metabolism	1494	LC/MS Neg	1021	738.5	128.035	98-79-3	7405	7127	C01879	HMDB00267
1723	5alpha-androstan-3beta,17alpha-diol disulfate	Lipid	Steroid	37187	LC/MS Neg	100002021	4215	225.07
1725	5alpha-androstan-3beta,17beta-diol disulfate	Lipid	Steroid	37190	LC/MS Neg	100001987	3880	225.07	571-20-0	242332		C12525	HMDB00493
1758	5beta-pregnan-3alpha,21-diol-11,20-dione 21-glucosiduronate	Lipid	Steroid	47401	LC/MS Neg	100005417	4732.4	523.255
3103	6-oxopiperidine-2-carboxylic acid	Xenobiotics	Drug	43231	LC/MS Pos	100004499	1826.6	144.066	34622-39-4	3014237	2282737
934	6-sialyl-N-acetyllactosamine	Carbohydrate	Aminosugar Metabolism	40428	LC/MS Neg	100003259	795	673.231	174757-71-2	16212424	17216384		HMDB06584
2560	7,8-dihydroneopterin	Cofactors and Vitamins	Pterin Metabolism	15689	LC/MS Pos	100000142	1095	256.104	1218-98-0	65074	58584	C04784	HMDB02275
1810	7-ketodeoxycholate	Lipid	Secondary Bile Acid Metabolism	31904	LC/MS Neg	100001063	4821	405.265	911-40-0	188292	163659		HMDB00391
2415	7-methylguanine	Nucleotide	Purine Metabolism, Guanine containing	35114	LC/MS Pos	100001456	1395.6	166.072	578-76-7	11361	10883	C02242	HMDB00897
2418	7-methylguanosine	Nucleotide	Purine Metabolism, Guanine containing	31580	LC/MS Pos	100001118	1475	298.115	20241-86-4		18629955
2664	7-methylurate	Xenobiotics	Xanthine Metabolism	39598	LC/MS Pos	100002241	1738	183.051	612-37-3	69160	62375
2671	7-methylxanthine	Xenobiotics	Xanthine Metabolism	34390	LC/MS Pos	100001396	1813.9	167.056	552-62-5	68374	61660	C16353	HMDB01991
2803	abscisate	Xenobiotics	Food Component/Plant	21156	LC/MS Neg	100000879	3170	263.129	14375-45-2	5280896	4444418	C06082	HMDB35140
2804	acetolactate	Xenobiotics	Food Component/Plant	38645	LC/MS Neg	100002418	1300	131.035	6034-46-4	22	71373	C00900	HMDB06833
1195	acetylcarnitine	Lipid	Fatty Acid Metabolism(Acyl Carnitine)	32198	LC/MS Pos	100000802	1166.9	204.123	5080-50-2	1	5406074	C02571	HMDB00201
3104	acetylsalicylate	Xenobiotics	Drug	37493	LC/MS Pos	100001953	3645	121.028	50-78-2	2244	2157	D00109,C01405	HMDB01879
358	acisoga	Amino Acid	Polyamine Metabolism	43258	LC/MS Pos	100004541	2290	185.128	106692-36-8	129397	114601
948	aconitate [cis or trans]	Energy	TCA Cycle	46173	LC/MS Neg	100001359	580	173.009				C00417	HMDB00072
2380	adenine	Nucleotide	Purine Metabolism, Adenine containing	554	LC/MS Pos	880	1002	136.062	73-24-5	190	185	C00147	HMDB00034
2379	adenosine	Nucleotide	Purine Metabolism, Adenine containing	555	LC/MS Pos	798	1625.3	268.104	58-61-7	60961	54923	C00212	HMDB00050
2375	adenosine 3',5'-cyclic monophosphate (cAMP)	Nucleotide	Purine Metabolism, Adenine containing	2831	LC/MS Neg	207	1952.2	328.045	60-92-4	6076	268	C00575	HMDB00058
1100	adipate	Lipid	Fatty Acid, Dicarboxylate	21134	LC/MS Pos	100000863	2460.4	147.065	124-04-9	196	191	C06104	HMDB00448
24	alanine	Amino Acid	Alanine and Aspartate Metabolism	1126	LC/MS Pos	811	696	90.055	56-41-7	5950	5735	C00041	HMDB00161
419	alanylleucine	Peptide	Dipeptide	37093	LC/MS Pos	100001890	2165	203.139	1638-60-4	259583	227831		HMDB28691
2368	allantoic acid	Nucleotide	Purine Metabolism, (Hypo)Xanthine/Inosine containing	33434	LC/MS Polar	218	2960	175.047	99-16-1	203	198	C00499	HMDB01209
2367	allantoin	Nucleotide	Purine Metabolism, (Hypo)Xanthine/Inosine containing	1107	LC/MS Polar	1002	1672	157.037	97-59-6	204	199	C02350	HMDB00462
2807	alliin	Xenobiotics	Food Component/Plant	41494	LC/MS Pos	100003473	1032	178.053	556-27-4	87310	78760	C08265	HMDB33592
16	allo-threonine	Amino Acid	Glycine, Serine and Threonine Metabolism	15142	GC/MS	100000272	1417.8	219	28954-12-3	99289	89699	C05519	HMDB04041
2544	alpha-CEHC glucuronide*	Cofactors and Vitamins	Tocopherol Metabolism	39346	LC/MS Neg	100003101	2616	453.177	477200-36-5
2545	alpha-CEHC sulfate	Cofactors and Vitamins	Tocopherol Metabolism	47666	LC/MS Neg	100005972	3090	357.101
283	alpha-hydroxyisocaproate	Amino Acid	Leucine, Isoleucine and Valine Metabolism	22132	LC/MS Neg	100000706	1840	131.071	10303-64-7	83697	75520	C03264	HMDB00746
254	alpha-hydroxyisovalerate	Amino Acid	Leucine, Isoleucine and Valine Metabolism	33937	LC/MS Neg	100001300	1126	117.056	600-37-3	99823	90190		HMDB00407
248	alpha-hydroxyisovaleroyl carnitine*	Amino Acid	Leucine, Isoleucine and Valine Metabolism	46263	LC/MS Pos	100005836	1863	262.165
951	alpha-ketoglutarate	Energy	TCA Cycle	528	LC/MS Polar	93	2700	145.014	305-72-6;328-50-7;22202-68-2	51	50	C00026	HMDB00208
1730	andro steroid monosulfate (1)*	Lipid	Steroid	32827	LC/MS Neg	100002152	3871	383.153				C04555	HMDB02759
1700	androsterone sulfate	Lipid	Steroid	31591	LC/MS Neg	100001073	5022	369.174	2479-86-9	159663	19988780		HMDB02759
408	anserine	Peptide	Dipeptide Derivative	15747	LC/MS Pos	100000044	651.8	241.13	10030-52-1	112072	100482	C01262	HMDB00194
204	anthranilate	Amino Acid	Tryptophan Metabolism	4970	LC/MS Pos	1258	3220	138.055	118-92-3	227	222	C00108	HMDB01123
807	arabinose	Carbohydrate	Pentose Metabolism	575	GC/MS	828	1631.6	217	28697-53-2	66308	59687	C00216	HMDB00646
812	arabitol	Carbohydrate	Pentose Metabolism	38075	GC/MS	100000012	1687.5	307.1	7643-75-6	94154	84971	C01904	HMDB01851
2531	arabonate	Cofactors and Vitamins	Ascorbate and Aldarate Metabolism	37516	GC/MS	100001937	1736	292.1	7643-75-7	122045	108861	C00878	HMDB00539
321	arginine	Amino Acid	Urea cycle; Arginine and Proline Metabolism	1638	LC/MS Pos	231	700	175.119	1119-34-2	232	227	C00062	HMDB00517
326	argininosuccinate	Amino Acid	Urea cycle; Arginine and Proline Metabolism	15497	LC/MS Pos	232	709.8	291.13	156637-58-0	16950;828	805	C03406	HMDB00052
2528	ascorbate (Vitamin C)	Cofactors and Vitamins	Ascorbate and Aldarate Metabolism	1640	GC/MS	233	1850.1	332.1	134-03-2		10189562	C00072	HMDB00044
29	asparagine	Amino Acid	Alanine and Aspartate Metabolism	512	LC/MS Pos	917	679	133.061	70-47-3	6267	6031	C00152	HMDB00168
27	aspartate	Amino Acid	Alanine and Aspartate Metabolism	443	LC/MS Polar	234	3500	132.03	56-84-8	5960	5745	C00049	HMDB00191
1110	azelate (nonanedioate)	Lipid	Fatty Acid, Dicarboxylate	18362	LC/MS Neg	2029	1276	187.098	123-99-9	2266	2179	C08261	HMDB00784
2609	benzoate	Xenobiotics	Benzoate Metabolism	15778	LC/MS Neg	100000008	1750	121.029	65-85-0	243	238	C00180	HMDB01870
2461	beta-alanine	Nucleotide	Pyrimidine Metabolism, Uracil containing	55	GC/MS	244	1451.8	174	56-41-7;107-95-9	239	234	C00099	HMDB00056
246	beta-hydroxyisovalerate	Amino Acid	Leucine, Isoleucine and Valine Metabolism	12129	LC/MS Neg	1442	1027	117.056	625-08-1	69362	62571		HMDB00754
247	beta-hydroxyisovaleroylcarnitine	Amino Acid	Leucine, Isoleucine and Valine Metabolism	35433	LC/MS Pos	100001594	1701	262.165	99159-87-2		21403176
6	betaine	Amino Acid	Glycine, Serine and Threonine Metabolism	3141	LC/MS Pos	799	734	118.086	107-43-7	247	24219951173	C00719	HMDB00043
2794	betonicine	Xenobiotics	Food Component/Plant	38100	LC/MS Pos	100002153	720	160.097	515-25-3	164642	144333	C08269	HMDB29412
2554	biopterin	Cofactors and Vitamins	Tetrahydrobiopterin Metabolism	12358	LC/MS Pos	1548	1562.7	238.093	22150-76-1	445040	392795	C06313	HMDB00468
2549	biotin	Cofactors and Vitamins	Biotin Metabolism	568	LC/MS Pos	251	3028.2	245.095	58-85-5	171548	149962	C00120	HMDB00030
1178	butyrylcarnitine	Lipid	Fatty Acid Metabolism (also BCAA Metabolism)	32412	LC/MS Pos	100001054	1977	232.154	25576-40-3	439829	184820	C02862	HMDB02013
1179	butyrylglycine	Lipid	Fatty Acid Metabolism (also BCAA Metabolism)	31850	LC/MS Neg	100001151	1470	144.067	20208-73-5	88412	79766		HMDB00808
232	C-glycosyltryptophan	Amino Acid	Tryptophan Metabolism	48782	LC/MS Pos	100006379	1907	367.15	180509-18-6	10981970	9157171
2659	caffeine	Xenobiotics	Xanthine Metabolism	569	LC/MS Pos	849	2819	195.088	58-08-2	2519	2424	C07481	HMDB01847
43	carboxyethyl-GABA	Amino Acid	Glutamate Metabolism	40007	LC/MS Pos	100003260	810	176.092	4386-03-02	2572	2474		HMDB02201
3084	carboxyibuprofen	Xenobiotics	Drug	43333	LC/MS Pos	100004171	4477	254.139	15935-54-3	10444113	8619532
1214	carnitine	Lipid	Carnitine Metabolism	15500	LC/MS Pos	100000007	688.9	162.112	461-05-2	10917	10455	C00318	HMDB00062
405	carnosine	Peptide	Dipeptide Derivative	1768	LC/MS Neg	249	804	225.099	305-84-0	439224	388363	C00386	HMDB00033
2626	catechol sulfate	Xenobiotics	Benzoate Metabolism	35320	LC/MS Neg	100001605	1906	188.986	4918-96-1	3083879	2341024	C00090	HMDB59724
1357	chiro-inositol	Lipid	Inositol Metabolism	37112	GC/MS	100001859	1857	318.1	643-12-9		10254647	C19891	HMDB34220
2829	chlorogenate	Xenobiotics	Food Component/Plant	34120	LC/MS Neg	100001349	1732	353.088	6001-76-9	5315832	4475041
1768	cholate	Lipid	Primary Bile Acid Metabolism	22842	LC/MS Neg	136	5165	407.28	81-25-4	221493		C00695	HMDB00619
1383	choline	Lipid	Phospholipid Metabolism	15506	LC/MS Pos	1256	675	104.107	67-48-1	305	149278	C00114	HMDB00097
1384	choline phosphate	Lipid	Phospholipid Metabolism	34396	LC/MS Pos	267	692.5	184.073	72556-74-2	1014	119298	C00588	HMDB01565
2838	cinnamoylglycine	Xenobiotics	Food Component/Plant	38637	LC/MS Neg	100002253	3127	204.067	16534-24-0	709625	618829		HMDB11621
60	cis-urocanate	Amino Acid	Histidine Metabolism	40410	LC/MS Pos	100003425	1421	139.05	7699-35-6	1549103	1266070
2839	citraconate	Xenobiotics	Food Component/Plant	18367	LC/MS Pos	100000450	1827	113.023	498-23-7	643798	553689	C02226	HMDB00634
49	citramalate	Amino Acid	Glutamate Metabolism	22158	GC/MS	100000998	1490.7	247	6236-10-08	1081	1051	C00815	HMDB00426
946	citrate	Energy	TCA Cycle	1564	LC/MS Neg	1124	582	191.02	77-92-9	311	305	C00158	HMDB00094
325	citrulline	Amino Acid	Urea cycle; Arginine and Proline Metabolism	2132	LC/MS Pos	391	730.3	176.103	372-75-8	9750	810	C00327	HMDB00904
1684	cortisol	Lipid	Steroid	1712	LC/MS Pos	356	4561.9	363.217	50-23-7	5754		C00735	HMDB00063
1685	cortisol glucuronide	Lipid	Steroid	47400	LC/MS Neg	100005434	4246.5	537.234
1689	cortisone	Lipid	Steroid	1769	LC/MS Pos	273	4407.9	361.201	53-06-5	222786	361685	C00762	HMDB02802
2675	cotinine	Xenobiotics	Tobacco Metabolite	553	LC/MS Pos	848	1525.2	177.102	486-56-6	854019	746405		HMDB01046
2677	cotinine N-oxide	Xenobiotics	Tobacco Metabolite	38662	LC/MS Pos	100002719	1758	193.097	36508-80-2	9815514	7991264		HMDB01411
349	creatine	Amino Acid	Creatine Metabolism	27718	LC/MS Pos	1221	771	132.077	57-00-1	586	566	C00300	HMDB00064
350	creatinine	Amino Acid	Creatine Metabolism	513	LC/MS Pos	275	730.8	114.066	60-27-5	588	568	C00791	HMDB00562
2845	cryptochlorogenic acid	Xenobiotics	Food Component/Plant	41924	LC/MS Neg	100003802	2087	353.088	905-99-7	5315599	4474874
299	cystathionine	Amino Acid	Methionine, Cysteine, SAM and Taurine Metabolism	15705	LC/MS Pos	310	674.7	223.075	535-34-2	439258	811	C02291	HMDB00099
304	cysteine	Amino Acid	Methionine, Cysteine, SAM and Taurine Metabolism	31453	GC/MS	800	1560.1	218	52-90-4;56-89-3	5862	5653	C00097	HMDB00574
309	cysteine s-sulfate	Amino Acid	Methionine, Cysteine, SAM and Taurine Metabolism	22176	LC/MS Neg	100000808	640.9	199.969	1637-71-4	115015	102939	C05824	HMDB00731
376	cysteine-glutathione disulfide	Amino Acid	Glutathione Metabolism	46734	LC/MS Pos	100001437	824	427.095	13081-14-6	4247235	3455404		HMDB00656
306	cystine	Amino Acid	Methionine, Cysteine, SAM and Taurine Metabolism	56	LC/MS Pos	279	675	241.031	56-89-3	67678	575	C00491	HMDB00192
2469	cytidine	Nucleotide	Pyrimidine Metabolism, Cytidine containing	514	LC/MS Pos	827	1075.9	244.093	65-46-3	6175	5940	C00475	HMDB00089
2470	cytosine	Nucleotide	Pyrimidine Metabolism, Cytidine containing	573	GC/MS	881	1535.5	254	71-30-7	597	577	C00380	HMDB00630
2850	daidzein	Xenobiotics	Food Component/Plant	32453	LC/MS Neg	100001219	3566	253.051	486-66-8	5281708	4445025	C10208	HMDB03312
3027	daidzein sulfate (1)	Xenobiotics	Food Component/Plant	48727	LC/MS Neg	100006362	2843	333.007
3023	daidzein sulfate (2)	Xenobiotics	Food Component/Plant	48728	LC/MS Neg	100006363	3330	333.008
1201	decanoylcarnitine	Lipid	Fatty Acid Metabolism(Acyl Carnitine)	33941	LC/MS Pos	100001251	4700	316.248	1492-27-9	10245190	8420677		HMDB00651
2529	dehydroascorbate	Cofactors and Vitamins	Ascorbate and Aldarate Metabolism	34302	LC/MS Neg	301	739.6	173.009	490-83-5	835	812	C05422	HMDB01264
1764	dehydroepiandrosterone glucuronide	Lipid	Steroid	47109	LC/MS Neg	100005405	4510	463.234
1694	dehydroisoandrosterone sulfate (DHEA-S)	Lipid	Steroid	32425	LC/MS Neg	100000792	4745	367.158	651-48-9	12594	12074	C04555	HMDB01032
1213	deoxycarnitine	Lipid	Carnitine Metabolism	36747	LC/MS Pos	100001662	742.4	146.118	6249-56-5	134	705	C01181	HMDB01161
3327	diglycerol	Xenobiotics	Chemical	40700	LC/MS Pos	100003700	1111	167.091	627-82-7	42953	39150
2555	dihydrobiopterin	Cofactors and Vitamins	Tetrahydrobiopterin Metabolism	35129	LC/MS Pos	100001506	1515	240.109	6779-87-9	1879	1808	C00268	HMDB00038
2855	dihydroferulic acid	Xenobiotics	Food Component/Plant	40481	LC/MS Neg	100003432	1928	195.066	1135-23-5	14340	13701
2431	dihydroorotate	Nucleotide	Pyrimidine Metabolism, Orotate containing	601	LC/MS Polar	923	1910.1	157.025	155-54-4	648	628	C00337	HMDB03349
3398	dimethyl sulfone	Xenobiotics	Chemical	43424	LC/MS Pos	100004284	1035	95.0161	67-71-0	6213	5978	C11142	HMDB04983
332	dimethylarginine (SDMA + ADMA)	Amino Acid	Urea cycle; Arginine and Proline Metabolism	36808	LC/MS Pos	100001810	810	203.15	102783-24-4	123831	110375	C03626	HMDB01539
5	dimethylglycine	Amino Acid	Glycine, Serine and Threonine Metabolism	5086	LC/MS Pos	806	719.4	104.071	1118-68-9	673	653	C01026	HMDB00092
1095	dimethylmalonic acid	Lipid	Fatty Acid, Dicarboxylate	42978	LC/MS Polar	100004251	2702	131.035	595-46-0	11686	11195		HMDB02001
136	dopamine	Amino Acid	Phenylalanine and Tyrosine Metabolism	12130	LC/MS Neg	1748	1510	152.072	62-31-7	681	661	C03758	HMDB00073
182	dopamine sulfate (1)	Amino Acid	Phenylalanine and Tyrosine Metabolism	48406	LC/MS Neg	100006360	1511	232.028
183	dopamine sulfate (2)	Amino Acid	Phenylalanine and Tyrosine Metabolism	48407	LC/MS Neg	100006361	1556.2	232.028
3400	ectoine	Xenobiotics	Chemical	35651	LC/MS Pos	100001635	823	143.082	96702-03-3	126041	112069	C06231
2859	enterolactone	Xenobiotics	Food Component/Plant	39626	LC/MS Neg	100003070	4515.2	297.113	78473-71-9	10685477	8860823
1696	epiandrosterone	Lipid	Steroid	1477	LC/MS Pos	321	5221	291.232	481-29-8	441302	390065	C07635	HMDB00365
1256	epiandrosterone glucuronide	Lipid	Fatty Acid, Monohydroxy	47111	LC/MS Neg	100005400	4642	465.249	4271-00-5	10298641	8474109
1697	epiandrosterone sulfate	Lipid	Steroid	33973	LC/MS Neg	100001287	4855	369.174	22229-22-7		21403101	C07635	HMDB00365
2862	equol glucuronide	Xenobiotics	Food Component/Plant	41948	LC/MS Neg	100003895	3215	417.119
2863	equol sulfate	Xenobiotics	Food Component/Plant	40478	LC/MS Neg	100003429	3630	321.044			23936050
2866	erythritol	Xenobiotics	Food Component/Plant	20699	GC/MS	100000846	1517.5	217	149-32-6	222285	13835932	C00503	HMDB02994
939	erythronate*	Carbohydrate	Aminosugar Metabolism	42420	LC/MS Polar	100001320	2186	135.03	88759-55-1	2781043	2061231		HMDB00613
1389	ethanolamine	Lipid	Phospholipid Metabolism	1497	GC/MS	420	1304	174.1	141-43-5	700	13835336	C00189	HMDB00149
3343	ethyl glucuronide	Xenobiotics	Chemical	39603	LC/MS Neg	100002849	793	221.067	17685-04-0	152226	134174
3459	ethyl paraben sulfate	Xenobiotics	Chemical	48463	LC/MS Neg	100006271	3445	245.013	162338-11-6
275	ethylmalonate	Amino Acid	Leucine, Isoleucine and Valine Metabolism	15765	LC/MS Polar	2054	2785	131.035	601-75-2	11756	11263		HMDB00622
1753	etiocholanolone glucuronide	Lipid	Steroid	47112	LC/MS Neg	100005403	4915	465.249	3602-09-03
3024	eugenol sulfate	Xenobiotics	Food Component/Plant	48715	LC/MS Neg	100006171	3782	243.033	95480-60-7	180632	157181
2869	ferulic acid 4-sulfate	Xenobiotics	Food Component/Plant	47114	LC/MS Neg	100005389	1225	273.007	86321-29-1	6305574	4878542		HMDB29200
61	formiminoglutamate	Amino Acid	Histidine Metabolism	43493	LC/MS Pos	100002500	781	175.071	816-90-0	439233	388370	C00439
868	fructose	Carbohydrate	Fructose, Mannose and Galactose Metabolism	577	GC/MS	878	1758	217	57-48-7	5984	5764	C00095	HMDB00660
2871	fucitol	Xenobiotics	Food Component/Plant	38313	LC/MS Neg	100002455	816.1	165.077	13074-06-1	3429	3311
818	fucose	Carbohydrate	Pentose Metabolism	15821	GC/MS	918	1682.2	204	2438-80-4	19466	2299091	C01018	HMDB00174
955	fumarate	Energy	TCA Cycle	1643	LC/MS Polar	330	3084	115.004	100-17-8	444972	10197150	C00122	HMDB00134
884	galactitol (dulcitol)	Carbohydrate	Fructose, Mannose and Galactose Metabolism	1117	GC/MS	1003	1849.2	319.1	608-66-2	11850	11357	C01697	HMDB00107
892	galactonate	Carbohydrate	Fructose, Mannose and Galactose Metabolism	27719	LC/MS Polar	100001026	3085	195.051	299-28-5	128869	114198	C00880	HMDB00565
42	gamma-aminobutyrate (GABA)	Amino Acid	Glutamate Metabolism	1416	GC/MS	141	1539.7	304.1	56-12-2	119	116	C00334	HMDB00112
51	gamma-carboxyglutamate	Amino Acid	Glutamate Metabolism	38754	LC/MS Pos	100002679	710	192.05	56271-99-9	40772	37241		41900
2542	gamma-CEHC	Cofactors and Vitamins	Tocopherol Metabolism	44876	LC/MS Neg	100002094	3843	263.129	178167-75-4	133098	117455		HMDB01931
2543	gamma-CEHC glucuronide*	Cofactors and Vitamins	Tocopherol Metabolism	42381	LC/MS Neg	100004243	2500	439.161
395	gamma-glutamylisoleucine*	Peptide	Gamma-glutamyl Amino Acid	34456	LC/MS Pos	100001485	2661	261.144		14253342	21403145		HMDB11170
396	gamma-glutamylleucine	Peptide	Gamma-glutamyl Amino Acid	18369	LC/MS Pos	1268	2757.2	261.144	2566-39-4	151023	133115		HMDB11171
399	gamma-glutamylphenylalanine	Peptide	Gamma-glutamyl Amino Acid	33422	LC/MS Pos	100000491	2865	295.129	7432-24-8	111299	99868		HMDB00594
400	gamma-glutamylthreonine*	Peptide	Gamma-glutamyl Amino Acid	33364	LC/MS Pos	100001314	996.6	249.108	5652-48-2		21403107		HMDB29159
402	gamma-glutamyltyrosine	Peptide	Gamma-glutamyl Amino Acid	2734	LC/MS Pos	1102	2080.4	311.124	7432-23-7	94340	85142		HMDB11741
403	gamma-glutamylvaline	Peptide	Gamma-glutamyl Amino Acid	43829	LC/MS Pos	100001126	2045	247.129	2746-34-1	7015683			HMDB11172
2731	genistein	Xenobiotics	Food Component/Plant	32448	LC/MS Neg	100001221	3754	269.046	446-72-0	5280961	4444448	C06563	HMDB03217
161	gentisate	Amino Acid	Phenylalanine and Tyrosine Metabolism	18280	LC/MS Neg	100000447	1459.8	153.019	490-79-9	3469	3350	C00628	HMDB00152
3457	gentisic acid-5-glucoside	Xenobiotics	Chemical	48729	LC/MS Neg	100006372	1434	315.072	1820-89-9	10914066	9089323
2527	glucarate (saccharate)	Cofactors and Vitamins	Ascorbate and Aldarate Metabolism	1476	GC/MS	1020	1885.8	333.1	5793-88-4	33037	30577	C00818	HMDB00663
2798	gluconate	Xenobiotics	Food Component/Plant	587	LC/MS Polar	338	2922	195.051	527-07-1	10690	10240	C00257	HMDB00625
910	glucosamine	Carbohydrate	Aminosugar Metabolism	18534	GC/MS	289	1833	203	66-84-2	441477	390201	C00329	HMDB01514
764	glucose	Carbohydrate	Glycolysis, Gluconeogenesis, and Pyruvate Metabolism	48152	LC/MS Polar	572	2342	225.062	50-99-7	79025	71358	C00031	HMDB00122
916	glucuronate	Carbohydrate	Aminosugar Metabolism	15443	LC/MS Polar	100000257	3233.3	193.035	207300-70-7	444791	58552	C00191	HMDB00127
37	glutamate	Amino Acid	Glutamate Metabolism	57	LC/MS Pos	561	710	148.06	56-86-0	611	591	C00025	HMDB00148
38	glutamine	Amino Acid	Glutamate Metabolism	53	LC/MS Pos	563	680	147.076	56-85-9	5961	5746	C00064	HMDB00641
81	glutarate (pentanedioate)	Amino Acid	Lysine Metabolism	396	LC/MS Polar	339	2900	131.035	110-94-1	743	3618533	C00489	HMDB00661
82	glutarylcarnitine (C5)	Amino Acid	Lysine Metabolism	44664	LC/MS Pos	100001593	1583.3	276.144	102636-82-8	71464488	21403175		HMDB13130
784	glycerate	Carbohydrate	Glycolysis, Gluconeogenesis, and Pyruvate Metabolism	1572	LC/MS Polar	1052	2070.4	105.019	600-19-1	752	732	C00258	HMDB00139
1524	glycerol	Lipid	Glycerolipid Metabolism	15122	LC/MS Neg	1254	758	91.0401	56-81-5	753	733	C00116	HMDB00131
1525	glycerol 3-phosphate (G3P)	Lipid	Glycerolipid Metabolism	43847	LC/MS Polar	100000258	3938.7	171.006	29849-82-9	754	734	C00093	HMDB00126
1392	glycerophosphoethanolamine	Lipid	Phospholipid Metabolism	37455	LC/MS Polar	100001620	3075	214.049	33049-08-0	123874	110410	C01233	HMDB00114
1530	glycerophosphoglycerol	Lipid	Glycerolipid Metabolism	48857	LC/MS Polar	100001619	2430	245.043		439964	388990	C03274
1386	glycerophosphorylcholine (GPC)	Lipid	Phospholipid Metabolism	15990	LC/MS Pos	100000269	709.9	258.11	28319-77-9	71920	571409	C00670	HMDB00086
1	glycine	Amino Acid	Glycine, Serine and Threonine Metabolism	11777	GC/MS	340	1166	101.9	56-40-6	750	730	C00037	HMDB00123
2881	glycitein	Xenobiotics	Food Component/Plant	34024	LC/MS Pos	100001222	4248	285.076	40957-83-3	5317750	4476508	C14536	HMDB05781
1772	glycochenodeoxycholate	Lipid	Primary Bile Acid Metabolism	32346	LC/MS Neg	1628	5236.1	448.307	16564-43-5	12544		C05466	HMDB00637
1769	glycocholate	Lipid	Primary Bile Acid Metabolism	18476	LC/MS Neg	342	5163	464.302	475-31-0;863-57-0	10140	9734	C01921	HMDB00138
1808	glycocholenate sulfate*	Lipid	Secondary Bile Acid Metabolism	32599	LC/MS Neg	100001989	4750	254.623
1780	glycodeoxycholate	Lipid	Secondary Bile Acid Metabolism	18477	LC/MS Neg	100000436	5281	448.307	360-65-6	3035026		C05464	HMDB00631
1799	glycohyocholate	Lipid	Secondary Bile Acid Metabolism	42574	LC/MS Neg	100004083	5020	464.302
3405	glycolate (hydroxyacetate)	Xenobiotics	Chemical	15737	GC/MS	203	1119	177	79-14-1	757	737	C00160	HMDB00115
1786	glycolithocholate sulfate*	Lipid	Secondary Bile Acid Metabolism	32620	LC/MS Neg	100001657	5011	255.631	15324-64-8	72222	65188	C11301	HMDB02639
1791	glycoursodeoxycholate	Lipid	Secondary Bile Acid Metabolism	39379	LC/MS Neg	100002911	5033	448.307	64480-66-6	12310288	19973534		HMDB00708
355	guanidinoacetate	Amino Acid	Creatine Metabolism	43802	LC/MS Pos	344	711.2	118.061	352-97-6	763	743	C00581	HMDB00128
372	guanidinosuccinate	Amino Acid	Guanidino and Acetamido Metabolism	32446	LC/MS Pos	100001212	742.9	176.067	6133-30-8	97856	88329	C03139	HMDB03157
2413	guanine	Nucleotide	Purine Metabolism, Guanine containing	32352	LC/MS Pos	172	1035	152.057	73-40-5	764	744	C00242	HMDB00132
2412	guanosine	Nucleotide	Purine Metabolism, Guanine containing	1573	LC/MS Pos	1099	1680	284.099	118-00-3	6802	6544	C00387	HMDB00133
2409	guanosine-3',5'-cyclic monophosphate (cGMP)	Nucleotide	Purine Metabolism, Guanine containing	2827	LC/MS Neg	104	1593	344.04	7665-99-8	24316	289	C00942	HMDB01314
2533	gulonic acid*	Cofactors and Vitamins	Ascorbate and Aldarate Metabolism	46957	LC/MS Polar	100001586	2750	195.051	20246-53-1	9794176	7969943
3321	heptaethylene glycol	Xenobiotics	Chemical	38154	LC/MS Pos	100002318	2865	327.201	5617-32-3	79718	72017
1188	heptanoyl glycine	Lipid	Fatty Acid Metabolism(Acyl Glycine)	42629	LC/MS Neg	100004195	3720	186.114	23783-23-5	10932172	9107408
3320	hexaethylene glycol	Xenobiotics	Chemical	38133	LC/MS Pos	100002317	2662	283.175	2615-15-8	17472	16521
1198	hexanoylcarnitine	Lipid	Fatty Acid Metabolism(Acyl Carnitine)	32328	LC/MS Pos	100000781	3194	260.186	6920-35-0	6426853	4932273		HMDB00705
1187	hexanoylglycine	Lipid	Fatty Acid Metabolism(Acyl Glycine)	35436	LC/MS Pos	100001527	3611	174.112	24003-67-6	99463	89859		HMDB00701
2597	hippurate	Xenobiotics	Benzoate Metabolism	15753	LC/MS Pos	100000014	2800	180.066	495-69-2	464	451	C01586	HMDB00714
52	histidine	Amino Acid	Histidine Metabolism	59	LC/MS Neg	355	755.9	154.062	5934-29-2	6274	752	C00135	HMDB00177
327	homoarginine	Amino Acid	Urea cycle; Arginine and Proline Metabolism	22137	LC/MS Neg	100000961	791.7	187.12	156-86-5	9085	8732	C01924	HMDB00670
407	homocarnosine	Peptide	Dipeptide Derivative	1633	LC/MS Neg	41	820	239.115	3650-73-5	10243361	8418848	C00884	HMDB00745
2887	homocitrate	Xenobiotics	Food Component/Plant	39601	GC/MS	100002554	1836.8	287.1	320573-06-6	439459	388564	C01251	HMDB03518
328	homocitrulline	Amino Acid	Urea cycle; Arginine and Proline Metabolism	22138	LC/MS Pos	100000963	821.7	190.119	1190-49-4	65072	58582	C02427	HMDB00679
2888	homostachydrine*	Xenobiotics	Food Component/Plant	33009	LC/MS Pos	100001550	1211	158.118	1195-94-4	441447	390180	C08283	HMDB33433
147	homovanillate (HVA)	Amino Acid	Phenylalanine and Tyrosine Metabolism	1101	LC/MS Neg	117	1649	181.051	306-08-1	1738	5323114	C05582	HMDB00118
148	homovanillate sulfate	Amino Acid	Phenylalanine and Tyrosine Metabolism	38349	LC/MS Neg	100002250	1047	261.007	38339-06-9	29981063	21896746		HMDB11719
3172	homoveratric acid	Xenobiotics	Drug	43508	LC/MS Pos	100004189	3567	197.081	93-40-3	7139	6872		HMDB00434
58	hydantoin-5-propionic acid	Amino Acid	Histidine Metabolism	40473	LC/MS Pos	100002514	1494	173.056	5624-26-0	782	761	C05565	HMDB01212
3173	hydrochlorothiazide	Xenobiotics	Drug	39625	LC/MS Neg	100002734	2046	295.957	58-93-5	3639	3513	C07041	HMDB01928
3175	hydroquinone sulfate	Xenobiotics	Drug	35322	LC/MS Neg	100001604	1395	188.986	123-31-9	161220	141624	C00530	HMDB02434
1196	hydroxybutyrylcarnitine*	Lipid	Fatty Acid Metabolism(Acyl Carnitine)	43264	LC/MS Pos	100003926	1477	248.149		53481617			HMDB13127
2676	hydroxycotinine	Xenobiotics	Tobacco Metabolite	38661	LC/MS Pos	100002717	1275	193.097	34834-67-8	10219774	8395266		HMDB01390
2358	hypoxanthine	Nucleotide	Purine Metabolism, (Hypo)Xanthine/Inosine containing	3127	LC/MS Neg	171	1291.2	135.031	68-94-0	790	768	C00262	HMDB00157
3081	ibuprofen	Xenobiotics	Drug	17799	LC/MS Pos	1487	5300	224.165	15687-27-1	3672	3544	D00126	HMDB01925
3080	ibuprofen acyl glucuronide	Xenobiotics	Drug	45472	LC/MS Neg	100002406	4855	381.155	115075-59-7	163959	143793
63	imidazole lactate	Amino Acid	Histidine Metabolism	15716	LC/MS Pos	100000263	782.7	157.061	14403-45-3	440129	389128	C05568	HMDB02320
62	imidazole propionate	Amino Acid	Histidine Metabolism	40730	LC/MS Pos	100003434	1020	141.066	1074-59-5	70630	63798		HMDB02271
3365	indole-3-acetamide	Xenobiotics	Chemical	37448	LC/MS Pos	100002095	3086	175.087	879-37-8	397	386	C02693
231	indole-3-carboxylic acid	Amino Acid	Tryptophan Metabolism	38116	LC/MS Pos	100002185	3651.9	162.055	771-50-6	69867		C19837	HMDB03320
196	indoleacetate	Amino Acid	Tryptophan Metabolism	27513	LC/MS Pos	100001034	3766.3	176.071	6505-45-9	802	780	C00954	HMDB00197
224	indoleacetylglutamine	Amino Acid	Tryptophan Metabolism	42087	LC/MS Pos	100001731	2963	304.129		25200879			HMDB13240
195	indolelactate	Amino Acid	Tryptophan Metabolism	18349	LC/MS Pos	100000463	3514	206.081	832-97-3	92904	83867	C02043	HMDB00671
2892	indolin-2-one	Xenobiotics	Food Component/Plant	43374	LC/MS Pos	100004318	3386	134.06	59-48-3	321710	284794	C12312
2357	inosine	Nucleotide	Purine Metabolism, (Hypo)Xanthine/Inosine containing	1123	LC/MS Pos	361	1679.3	269.088	58-63-9	6021	21241953	C00294	HMDB00195
280	isobutyrylcarnitine	Amino Acid	Leucine, Isoleucine and Valine Metabolism	33441	LC/MS Pos	100001055	1955.1	232.154	25518-49-4	168379			HMDB00736
281	isobutyrylglycine	Amino Acid	Leucine, Isoleucine and Valine Metabolism	35437	LC/MS Pos	100001590	2009	146.081	15926-18-8	10855600	9030891		HMDB00730
950	isocitrate	Energy	TCA Cycle	12110	LC/MS Pos	1206	967.7	193.034	20226-99-7	1198	1161	C00311	HMDB00193
3030	isoeugenol sulfate	Xenobiotics	Food Component/Plant	48997	LC/MS Neg	100006089	3893	243.033
264	isoleucine	Amino Acid	Leucine, Isoleucine and Valine Metabolism	1125	LC/MS Pos	376	1599	132.102	73-32-5	6306	769	C00407	HMDB00172
3184	isosorbide	Xenobiotics	Drug	20876	GC/MS	100000875	1522	100.9	652-67-5	12597	12077	D00347
241	isovalerate	Amino Acid	Leucine, Isoleucine and Valine Metabolism	44656	LC/MS Neg	100000708	1564	101.061	503-74-2	10430	10001	C08262	HMDB00718
243	isovalerylcarnitine	Amino Acid	Leucine, Isoleucine and Valine Metabolism	34407	LC/MS Pos	100001393	2504.9	246.17	31023-24-2	6426851	4932271		HMDB00688
242	isovalerylglycine	Amino Acid	Leucine, Isoleucine and Valine Metabolism	35107	LC/MS Neg	100001452	1950	158.082	16284-60-9	546304	475516		HMDB00678
960	itaconate (methylenesuccinate)	Energy	TCA Cycle	35962	GC/MS	100000455	1570	229.1	97-65-4	811	789	C00490	HMDB02092
202	kynurenate	Amino Acid	Tryptophan Metabolism	1417	LC/MS Pos	98	2806	190.05	492-27-3	3845	3712	C01717	HMDB00715
201	kynurenine	Amino Acid	Tryptophan Metabolism	15140	LC/MS Pos	100000265	1902.1	209.092	2922-83-0	161166	141580	C00328	HMDB00684
2575	L-urobilin	Cofactors and Vitamins	Hemoglobin and Porphyrin Metabolism	40173	LC/MS Neg	100002568	4624	593.334	34217-90-8	5280818	4444369	C05793	HMDB04159
781	lactate	Carbohydrate	Glycolysis, Gluconeogenesis, and Pyruvate Metabolism	527	LC/MS Neg	482	681.6	89.0244	79-33-4	612	592	C00186	HMDB00190
836	lactose	Carbohydrate	Disaccharides and Oligosaccharides	567	GC/MS	393	2134	204	5965-66-2	84571	5904	C00243	HMDB00186
1204	laurylcarnitine	Lipid	Fatty Acid Metabolism(Acyl Carnitine)	34534	LC/MS Pos	100001392	5070	344.28	25518-54-1	10427569	8602997		HMDB02250
235	leucine	Amino Acid	Leucine, Isoleucine and Valine Metabolism	60	LC/MS Pos	397	1680.2	132.102	61-90-5	6106	5880	C00123	HMDB00687
2756	levulinate (4-oxovalerate)	Xenobiotics	Food Component/Plant	22177	LC/MS Pos	100000765	1869	99.0441	123-76-2	11579	11091		HMDB00720
3193	lidocaine	Xenobiotics	Drug	35661	LC/MS Pos	100001538	2850	235.18	137-58-6	3676	3548	D00358	HMDB14426
2905	linamarin	Xenobiotics	Food Component/Plant	39606	LC/MS Pos	100003124	1882	265.139	554-35-8	11128	10657	C01594	HMDB33699
72	lysine	Amino Acid	Lysine Metabolism	1301	LC/MS Pos	407	613.8	147.113	56-87-1	5962	5747	C00047	HMDB00182
117	m-tyramine	Amino Acid	Phenylalanine and Tyrosine Metabolism	39581	LC/MS Pos	100002797	1645	138.091	588-05-6	11492	11008		HMDB04989
956	malate	Energy	TCA Cycle	1303	LC/MS Polar	409	3343.1	133.014	6915-15-7	525	510	C00149	HMDB00156
1104	maleate (cis-Butenedioate)	Lipid	Fatty Acid, Dicarboxylate	20676	LC/MS Polar	100000707	2510	115.004	110-16-7	444266	392248	C01384	HMDB00176
1165	malonate (propanedioate)	Lipid	Fatty Acid Synthesis	15872	LC/MS Polar	818	3447	103.004	141-82-2;26522-22-85-0	867	844	C00383	HMDB00691
1164	malonylcarnitine	Lipid	Fatty Acid Synthesis	37059	LC/MS Pos	100001526	965	248.113	853728-01-5	22833583	21403153		HMDB02095
2605	mandelate	Xenobiotics	Benzoate Metabolism	22160	LC/MS Neg	100000710	1431.4	151.04	90-64-2	1292	1253	C01984	HMDB00703
878	mannitol	Carbohydrate	Fructose, Mannose and Galactose Metabolism	15335	GC/MS	100000277	1839	319.1	69-65-8	6251	6015	C00392	HMDB00765
874	mannose	Carbohydrate	Fructose, Mannose and Galactose Metabolism	584	GC/MS	803	1753.5	204	3458-28-4	18950	141983	C00159	HMDB00169
964	mesaconate (methylfumarate)	Energy	TCA Cycle	18493	GC/MS	100000446	1429	184	498-24-8	638129	10289044	C01732	HMDB00749
287	methionine	Amino Acid	Methionine, Cysteine, SAM and Taurine Metabolism	1302	LC/MS Pos	415	1250	150.058	63-68-3	6137	5907	C00073	HMDB00696
291	methionine sulfone	Amino Acid	Methionine, Cysteine, SAM and Taurine Metabolism	44878	LC/MS Neg	100004635	740.8	180.034	820-10-0	69961	63154
292	methionine sulfoxide	Amino Acid	Methionine, Cysteine, SAM and Taurine Metabolism	18374	LC/MS Polar	100000039	2698	164.039	3226-65-1	158980	139840	C02989	HMDB02005
2993	methyl glucopyranoside (alpha + beta)	Xenobiotics	Food Component/Plant	46144	LC/MS Pos	100005864	1090	212.113
2914	methyl indole-3-acetate	Xenobiotics	Food Component/Plant	1584	LC/MS Pos	1104	4350	190.086	1912-33-0	74706	67279		HMDB29738
2656	methyl-4-hydroxybenzoate sulfate	Xenobiotics	Benzoate Metabolism	48429	LC/MS Neg	100006116	2873	230.997
256	methylsuccinate	Amino Acid	Leucine, Isoleucine and Valine Metabolism	15745	LC/MS Polar	2051	2800	131.035	498-21-5	10349	9922		HMDB01844
3203	metoprolol	Xenobiotics	Drug	18037	LC/MS Pos	2028	3186.6	268.191	56392-17-7	4171	4027	D02358	HMDB01932
3204	metoprolol acid metabolite*	Xenobiotics	Drug	34109	LC/MS Pos	100001385	2558	268.154	56392-14-4	62936	56653
1356	myo-inositol	Lipid	Inositol Metabolism	19934	GC/MS	363	1924.9	217	87-89-8	892	10239179	C00137	HMDB00211
3278	N,O-didesmethyl venlafaxine*	Xenobiotics	Drug	48006	LC/MS Pos	100006000	3140	250.18	135308-74-6	3451347	2693701
3279	N,O-didesmethylvenlafaxine glucuronide*	Xenobiotics	Drug	48008	LC/MS Pos	100006001	2550	426.212	1021933-99-2
2917	N-(2-furoyl)glycine	Xenobiotics	Food Component/Plant	31536	LC/MS Pos	100001086	2099.5	170.045	5657-19-2;5657-19-2	21863	20549		HMDB00439
75	N-6-trimethyllysine	Amino Acid	Lysine Metabolism	1498	LC/MS Pos	189	690	189.16	23284-33-5	440120	140379	C03793	HMDB01325
57	N-acetyl-1-methylhistidine*	Amino Acid	Histidine Metabolism	43255	LC/MS Pos	100004299	987	212.103
56	N-acetyl-3-methylhistidine*	Amino Acid	Histidine Metabolism	43256	LC/MS Pos	100002204	917	212.103	37841-04-6	193270	19993498
41	N-acetyl-aspartyl-glutamate (NAAG)	Amino Acid	Glutamate Metabolism	35665	LC/MS Pos	100001612	1575.4	305.098	3106-85-2	5255	5065	C12270	HMDB01067
2462	N-acetyl-beta-alanine	Nucleotide	Pyrimidine Metabolism, Uracil containing	37432	LC/MS Pos	100002102	1471	132.066	3025-95-4	76406	68881	C01073
91	N-acetyl-cadaverine	Amino Acid	Lysine Metabolism	43530	LC/MS Pos	100002249	1245	145.134	32343-73-0
3001	N-acetyl-S-allyl-L-cysteine	Xenobiotics	Food Component/Plant	47136	LC/MS Neg	100005818	2237	202.054	23127-41-5	152467	134378
25	N-acetylalanine	Amino Acid	Alanine and Aspartate Metabolism	1585	LC/MS Pos	1110	1595.7	132.066	97-69-8	88064	79449	C02847	HMDB00766
2808	N-acetylalliin	Xenobiotics	Food Component/Plant	45404	LC/MS Pos	100005367	1785	220.064
333	N-acetylarginine	Amino Acid	Urea cycle; Arginine and Proline Metabolism	33953	LC/MS Pos	100001266	1116	217.13	155-84-0	67427	60752	C02562	HMDB04620
30	N-acetylasparagine	Amino Acid	Alanine and Aspartate Metabolism	33942	LC/MS Neg	100001257	718.3	173.057	4033-40-3	99715	90090		HMDB06028
31	N-acetylaspartate (NAA)	Amino Acid	Alanine and Aspartate Metabolism	22185	LC/MS Pos	100000787	1222.4	176.055	997-55-7;997-55-7	65065	58576	C01042	HMDB00812
406	N-acetylcarnosine	Peptide	Dipeptide Derivative	43488	LC/MS Pos	100004046	1166	269.124	56353-15-2	9903482	8079136		HMDB12881
348	N-acetylcitrulline	Amino Acid	Urea cycle; Arginine and Proline Metabolism	48434	LC/MS Pos	100001577	1456	218.114	33965-42-3	656979	571213	C15532	HMDB00856
305	N-acetylcysteine	Amino Acid	Methionine, Cysteine, SAM and Taurine Metabolism	1586	LC/MS Pos	1107	1792	164.038	616-91-1	12035	11540	C06809	HMDB01890
923	N-acetylgalactosamine	Carbohydrate	Aminosugar Metabolism	2766	GC/MS	1106	1887.4	245.1	14215-68-0	35717	32855	C01074	HMDB00212
39	N-acetylglutamate	Amino Acid	Glutamate Metabolism	15720	LC/MS Pos	100000282	1492	190.071	5817-08-03	70914	1266066	C00624	HMDB01138
40	N-acetylglutamine	Amino Acid	Glutamate Metabolism	33943	LC/MS Pos	100001253	1193	189.087	2490-97-3	182230	158492	C02716	HMDB06029
2	N-acetylglycine	Amino Acid	Glycine, Serine and Threonine Metabolism	27710	LC/MS Pos	100001006	1108	118.05	543-24-8	10972	10507		HMDB00532
71	N-acetylhistamine	Amino Acid	Histidine Metabolism	48679	LC/MS Pos	100006123	1000	154.097	673-49-4	69602	62805	C05135	HMDB13253
53	N-acetylhistidine	Amino Acid	Histidine Metabolism	33946	LC/MS Pos	100001293	848	198.087	39145-52-3	75619	68142	C02997	HMDB32055
266	N-acetylisoleucine	Amino Acid	Leucine, Isoleucine and Valine Metabolism	33967	LC/MS Pos	100001276	3345.5	174.112	3077-46-1	2802421	2081100
233	N-acetylkynurenine (2)	Amino Acid	Tryptophan Metabolism	48757	LC/MS Pos	100006378	3114	251.103
236	N-acetylleucine	Amino Acid	Leucine, Isoleucine and Valine Metabolism	1587	LC/MS Pos	1082	3453.4	174.112	1188-21-2	70912	64075	C02710	HMDB11756
288	N-acetylmethionine	Amino Acid	Methionine, Cysteine, SAM and Taurine Metabolism	1589	LC/MS Neg	1083	1787	190.054	65-82-7	448580	395338	C02712	HMDB11745
293	N-acetylmethionine sulfoxide	Amino Acid	Methionine, Cysteine, SAM and Taurine Metabolism	45428	LC/MS Neg	100005463	942	206.049		193368	167798
927	N-acetylneuraminate	Carbohydrate	Aminosugar Metabolism	32377	LC/MS Neg	1162	693	308.099	131-48-6	439197	10292217	C00270	HMDB00230
98	N-acetylphenylalanine	Amino Acid	Phenylalanine and Tyrosine Metabolism	33950	LC/MS Neg	100001256	2597	206.082	2018-61-3	74839	67404	C03519	HMDB00512
334	N-acetylproline	Amino Acid	Urea cycle; Arginine and Proline Metabolism	34387	LC/MS Pos	100001334	2210	158.081	1074-79-9	322640	285677
365	N-acetylputrescine	Amino Acid	Polyamine Metabolism	37496	LC/MS Pos	192	840	131.118	18233-70-0	122356	109095	C02714	HMDB02064
3026	N-acetylpyrraline	Xenobiotics	Food Component/Plant	48438	LC/MS Pos	100006120	3050	297.144
10	N-acetylserine	Amino Acid	Glycine, Serine and Threonine Metabolism	37076	LC/MS Pos	100001851	1021	148.06	97-14-3	65249	58744		HMDB02931
315	N-acetyltaurine	Amino Acid	Methionine, Cysteine, SAM and Taurine Metabolism	48187	LC/MS Neg	100005466	800	166.018		159864	140553
15	N-acetylthreonine	Amino Acid	Glycine, Serine and Threonine Metabolism	33939	LC/MS Neg	100001274	821.6	160.062	17093-74-2	152204	3841173	C01118
192	N-acetyltryptophan	Amino Acid	Tryptophan Metabolism	33959	LC/MS Neg	100001254	2630	245.093	1218-34-4	700653	610602	C03137	HMDB13713
111	N-acetyltyrosine	Amino Acid	Phenylalanine and Tyrosine Metabolism	32390	LC/MS Neg	100001104	1680	222.077	537-55-3	68310	61606		HMDB00866
277	N-acetylvaline	Amino Acid	Leucine, Isoleucine and Valine Metabolism	1591	LC/MS Neg	1084	1704	158.082	96-81-1	66789	60154		HMDB11757
2430	N-carbamoylaspartate	Nucleotide	Pyrimidine Metabolism, Orotate containing	1594	LC/MS Pos	1108	941.2	177.051	923-37-5	93072	4573859	C00438	HMDB00828
354	N-carbamoylsarcosine	Amino Acid	Creatine Metabolism	38696	LC/MS Pos	100002606	1292	133.061	30565-25-4	439375	388495	C01043	HMDB12265
3131	N-carbamylglutamate	Xenobiotics	Drug	38749	LC/MS Neg	100002668	615	189.052	1188-38-1	121396	108351	C05829
336	N-delta-acetylornithine	Amino Acid	Urea cycle; Arginine and Proline Metabolism	43249	LC/MS Pos	100004523	887	175.108		9920500	8096135
3214	N-ethylglycinexylidide	Xenobiotics	Drug	33080	LC/MS Pos	100001539	2630	207.149	7728-40-7	24415	22824	C16561	HMDB60656
289	N-formylmethionine	Amino Acid	Methionine, Cysteine, SAM and Taurine Metabolism	2829	LC/MS Neg	194	1543.8	176.039	4289-98-9	439750	388809	C03145	HMDB01015
353	N-methylhydantoin	Amino Acid	Creatine Metabolism	40006	LC/MS Neg	100002557	1425	113.036	616-04-6	69217	62430	C02565	HMDB03646
3442	N-methylpipecolate	Xenobiotics	Chemical	47101	LC/MS Pos	100005383	1129	144.102	41447-17-0	11862129;11286529	9461516
340	N-methylproline	Amino Acid	Urea cycle; Arginine and Proline Metabolism	37431	LC/MS Pos	100001956	831	130.086	475-11-6	557	541
316	N-methyltaurine	Amino Acid	Methionine, Cysteine, SAM and Taurine Metabolism	42989	LC/MS Neg	100004056	704	138.023	107-68-6	6994586;7882	7594
1189	N-octanoylglycine	Lipid	Fatty Acid Metabolism(Acyl Glycine)	43502	LC/MS Neg	100003940	4335.4	200.129	14246-53-8	84290	76040		HMDB00832
2514	N1-Methyl-2-pyridone-5-carboxamide	Cofactors and Vitamins	Nicotinate and Nicotinamide Metabolism	40469	LC/MS Pos	100001468	1688	153.066	701-44-0	69698	62899	C05842	HMDB04193
2385	N1-methyladenosine	Nucleotide	Purine Metabolism, Adenine containing	15650	LC/MS Pos	1242	1399	282.12	15763-06-1	27476	4573813	C02494	HMDB03331
2419	N1-methylguanosine	Nucleotide	Purine Metabolism, Guanine containing	31609	LC/MS Pos	100001122	1869	298.115	2140-65-0	96373	86996		HMDB01563
2422	N2,N2-dimethylguanine	Nucleotide	Purine Metabolism, Guanine containing	37081	LC/MS Pos	100001853	1773	180.088	1445-15-4	74047	66666
2421	N2,N2-dimethylguanosine	Nucleotide	Purine Metabolism, Guanine containing	35137	LC/MS Pos	100001412	2168	312.13	2140-67-2	92919	83878		HMDB04824
337	N2,N5-diacetylornithine	Amino Acid	Urea cycle; Arginine and Proline Metabolism	43591	LC/MS Neg	100004575	1367	215.104	39825-23-5	10398396	8573834
96	N2,N6-diacetyllysine	Amino Acid	Lysine Metabolism	48455	LC/MS Neg	100006124	1604	229.119	499-86-5	91827	82921
73	N2-acetyllysine	Amino Acid	Lysine Metabolism	36751	LC/MS Pos	100001721	836	189.123	1946-82-3	92907	83869	C12989	HMDB00446
2420	N2-methylguanosine	Nucleotide	Purine Metabolism, Guanine containing	35133	LC/MS Pos	100001467	1960	298.115	2140-77-4	3035422	2299669		HMDB05862
2448	N3-methyluridine	Nucleotide	Pyrimidine Metabolism, Uracil containing	35135	LC/MS Pos	100001424	1930	259.092	2140-69-4	99592	89976		HMDB04813
2473	N4-acetylcytidine	Nucleotide	Pyrimidine Metabolism, Cytidine containing	35130	LC/MS Pos	100001413	2040	286.103	3768-18-1	107461	96702		HMDB05923
74	N6-acetyllysine	Amino Acid	Lysine Metabolism	36752	LC/MS Pos	100001734	1140	189.123	692-04-6	92832	83801	C02727	HMDB00206
2395	N6-carbamoylthreonyladenosine	Nucleotide	Purine Metabolism, Adenine containing	35157	LC/MS Pos	100001415	2673	413.142	24719-82-2	161466	141829		HMDB41623
94	N6-carboxyethyllysine	Amino Acid	Lysine Metabolism	37458	LC/MS Pos	100001769	660	219.134			11312319
2386	N6-methyladenosine	Nucleotide	Purine Metabolism, Adenine containing	37114	LC/MS Pos	213	1988	282.12	1867-73-8	102175	92307		HMDB04044
2404	N6-succinyladenosine	Nucleotide	Purine Metabolism, Adenine containing	48130	LC/MS Pos	100001664	2222	384.115	4542-23-8				HMDB00912
2918	naringenin	Xenobiotics	Food Component/Plant	44663	LC/MS Neg	100000920	3437.3	271.061	67604-48-2	932	907	C00509	HMDB02670
2559	neopterin	Cofactors and Vitamins	Pterin Metabolism	35131	LC/MS Pos	100001474	1116	254.088	2009-64-5	4455	389684	C05926	HMDB00845
2495	nicotinamide	Cofactors and Vitamins	Nicotinate and Nicotinamide Metabolism	594	LC/MS Pos	432	1271.1	123.055	98-92-0	936	911	C00153	HMDB01406
2498	nicotinamide riboside	Cofactors and Vitamins	Nicotinate and Nicotinamide Metabolism	33013	LC/MS Pos	100001310	930	255.098	1341-23-7	439924		C03150	HMDB00855
3215	nicotine	Xenobiotics	Drug	38666	LC/MS Pos	100002736	1294	163.123	54-11-5	89594	80863	C00745	HMDB01934
133	o-cresol sulfate	Amino Acid	Phenylalanine and Tyrosine Metabolism	36845	LC/MS Neg	100001806	2796	187.007		11615528	9790277
3148	O-desmethylvenlafaxine	Xenobiotics	Drug	43334	LC/MS Pos	100004173	3088	264.196	300827-87-6
2628	O-methylcatechol sulfate	Xenobiotics	Benzoate Metabolism	46111	LC/MS Neg	100004208	2344	203.002		22473	21078
3339	O-sulfo-L-tyrosine	Xenobiotics	Chemical	45413	LC/MS Neg	100005384	990	260.023		514186	448617
3322	octaethylene glycol	Xenobiotics	Chemical	38155	LC/MS Pos	100002319	3056	371.228	5117-19-1	78798	71135
1199	octanoylcarnitine	Lipid	Fatty Acid Metabolism(Acyl Carnitine)	33936	LC/MS Pos	100001247	4090	288.217	3671-77-0	123701	110274	C02838	HMDB00791
323	ornithine	Amino Acid	Urea cycle; Arginine and Proline Metabolism	1493	LC/MS Pos	444	614	133.097	3184-13-2	6262	6026	C00077	HMDB03374
2432	orotate	Nucleotide	Pyrimidine Metabolism, Orotate containing	1505	LC/MS Polar	445	1638.1	155.01	50887-69-9	967	942	C00295	HMDB00226
2434	orotidine	Nucleotide	Pyrimidine Metabolism, Orotate containing	35172	LC/MS Neg	100001416	698.3	287.052	314-50-1	92751	83729	C01103	HMDB00788
2532	oxalate (ethanedioate)	Cofactors and Vitamins	Ascorbate and Aldarate Metabolism	20694	LC/MS Neg	100000841	603	88.988	144-62-7	971	946	C00209	HMDB02329
3225	oxypurinol	Xenobiotics	Drug	41726	LC/MS Polar	100002489	1656	151.026	2465-59-0	4644	4483	D02365	HMDB00786
127	p-cresol sulfate	Amino Acid	Phenylalanine and Tyrosine Metabolism	36103	LC/MS Neg	100001315	2890	187.007	3233-57-7	4615423	3806480	C01468	HMDB11635
184	p-cresol-glucuronide*	Amino Acid	Phenylalanine and Tyrosine Metabolism	48841	LC/MS Pos	100006191	3366	302.123	17680-99-8	154035	135751		HMDB11686
3285	p-hydroxyatorvastatin	Xenobiotics	Drug	47881	LC/MS Neg	100005939	4650	573.241	265989-44-4	9851106	8026819
3286	p-hydroxyatorvastatin lactone	Xenobiotics	Drug	47880	LC/MS Pos	100005938	4851	557.245			10658501
2520	pantothenate	Cofactors and Vitamins	Pantothenate and CoA Metabolism	1508	LC/MS Neg	1024	1498.7	218.103	137-08-6	6613	6361	C00864	HMDB00210
2660	paraxanthine	Xenobiotics	Xanthine Metabolism	18254	LC/MS Pos	100000453	2443.3	181.072	611-59-6	4687	4525	C13747	HMDB01860
3319	pentaethylene glycol	Xenobiotics	Chemical	38158	LC/MS Pos	100002316	2454	239.149	4792-15-8	62551	56318
125	phenol sulfate	Amino Acid	Phenylalanine and Tyrosine Metabolism	32553	LC/MS Neg	100001510	2156	172.991	937-34-8	74426	67018	C02180	HMDB60015
181	phenylacetylcarnitine	Amino Acid	Phenylalanine and Tyrosine Metabolism	48425	LC/MS Pos	100006108	2687	280.154	287108-21-8
109	phenylacetylglutamine	Amino Acid	Phenylalanine and Tyrosine Metabolism	35126	LC/MS Pos	100001417	2875	265.118	28047-15-6	92258	270643	C04148	HMDB06344
108	phenylacetylglycine	Amino Acid	Phenylalanine and Tyrosine Metabolism	33945	LC/MS Pos	100001275	3090	194.081	500-98-1	68144	61452	C05598	HMDB00821
97	phenylalanine	Amino Acid	Phenylalanine and Tyrosine Metabolism	64	LC/MS Pos	460	2050	166.086	63-91-2	6140	5910	C00079	HMDB00159
605	phenylalanylglycine	Peptide	Dipeptide	41370	LC/MS Pos	100003588	2155	223.108	721-90-4	98207	88678
3426	phenylcarnitine*	Xenobiotics	Chemical	43265	LC/MS Pos	100004555	2629.9	266.139	105450-08-6
102	phenyllactate (PLA)	Amino Acid	Phenylalanine and Tyrosine Metabolism	22130	LC/MS Polar	100000774	908	165.056	828-01-3	3848	3715	C05607	HMDB00779
162	phenylpropionylglycine	Amino Acid	Phenylalanine and Tyrosine Metabolism	35434	LC/MS Neg	100001591	2945.3	206.082	56613-60-6	152323	134261		HMDB00860
968	phosphate	Energy	Oxidative Phosphorylation	42109	LC/MS Neg	461	608	96.9696	7664-38-2	1061	1032	C00009	HMDB01429
1390	phosphoethanolamine	Lipid	Phospholipid Metabolism	1600	LC/MS Neg	1026	638	140.012	1071-23-4	1015	990	C00346	HMDB00224
209	picolinate	Amino Acid	Tryptophan Metabolism	1512	LC/MS Pos	1022	1117	124.039	98-98-6	1018	993	C10164	HMDB02243
1105	pimelate (heptanedioate)	Lipid	Fatty Acid, Dicarboxylate	15704	LC/MS Polar	100000101	2745	159.066	111-16-0	385	376	C02656	HMDB00857
89	pipecolate	Amino Acid	Lysine Metabolism	1444	LC/MS Pos	1025	1120	130.086	4043-87-2	849	826	C00408	HMDB00070
2683	piperidine	Xenobiotics	Food Component/Plant	38183	LC/MS Pos	100002398	1139	86.0964	110-89-4	8082	7791	C01746	HMDB34301
3235	pivaloylcarnitine	Xenobiotics	Drug	35432	LC/MS Pos	100001589	2400	246.17		126894	112688		HDMB41993
1675	pregn steroid monosulfate*	Lipid	Steroid	32619	LC/MS Neg	100002067	5000	397.205	1247-64-9		13465233
1676	pregnanediol-3-glucuronide	Lipid	Steroid	40708	LC/MS Neg	100003470	5145	495.296	1852-49-9	123796	110346
1674	pregnen-diol disulfate*	Lipid	Steroid	32562	LC/MS Neg	100001993	3868	238.077
344	pro-hydroxy-pro	Amino Acid	Urea cycle; Arginine and Proline Metabolism	35127	LC/MS Pos	100001167	950	229.118	18684-24-7	11673055	9847785		HMDB06695
324	proline	Amino Acid	Urea cycle; Arginine and Proline Metabolism	1898	LC/MS Pos	480	805	116.071	147-85-3	145742	128566	C00148	HMDB00162
622	prolylglycine	Peptide	Dipeptide	40703	LC/MS Pos	100003674	875	173.092	2578-57-6	7408076;6426709	4932143
1181	propionylcarnitine	Lipid	Fatty Acid Metabolism (also BCAA Metabolism)	32452	LC/MS Pos	100001162	1590	218.139	17298-37-2	107738	96904	C03017	HMDB00824
1182	propionylglycine	Lipid	Fatty Acid Metabolism (also BCAA Metabolism)	31932	LC/MS Pos	100001150	1551	132.066	21709-90-0	98681	89122		HMDB00783
2446	pseudouridine	Nucleotide	Pyrimidine Metabolism, Uracil containing	33442	LC/MS Neg	821	1100	243.062	1445-07-4	15047	21403010	C02067	HMDB00767
2558	pterin	Cofactors and Vitamins	Pterin Metabolism	43023	LC/MS Pos	100004216	1545	164.057	22363-60-4	73000	65806	C00715	HMDB00802
2594	pyridoxal	Cofactors and Vitamins	Vitamin B6 Metabolism	1651	LC/MS Pos	491	1203	168.066	65-22-5	1050	1021	C00250	HMDB01545
2595	pyridoxate	Cofactors and Vitamins	Vitamin B6 Metabolism	31555	LC/MS Neg	100001121	2185	182.046	82-82-6	6723	6467	C00847	HMDB00017
48	pyroglutamine*	Amino Acid	Glutamate Metabolism	46225	LC/MS Pos	100001540	750	129.066	2353-44-8	134508	118562
3021	pyrraline	Xenobiotics	Food Component/Plant	48428	LC/MS Pos	100001767	2275	255.134	74509-14-1		19980286
780	pyruvate	Carbohydrate	Glycolysis, Gluconeogenesis, and Pyruvate Metabolism	599	GC/MS	823	1130.6	217	127-17-3	1060	96901	C00022	HMDB00243
2950	quinate	Xenobiotics	Food Component/Plant	18335	LC/MS Polar	100000442	2432.9	191.056	77-95-2	6508	10246715	C00296	HMDB03072
3242	quinine	Xenobiotics	Drug	39767	LC/MS Pos	100002968	2855	325.191	130-95-0	2728270	2010267
2491	quinolinate	Cofactors and Vitamins	Nicotinate and Nicotinamide Metabolism	1899	LC/MS Pos	182	1285	168.029	89-00-9	1066	1037	C03722	HMDB00232
863	raffinose	Carbohydrate	Disaccharides and Oligosaccharides	586	LC/MS Neg	879	978.3	503.162	17629-30-0	10542	388379	C00492	HMDB03213
2951	resveratrol	Xenobiotics	Food Component/Plant	17746	LC/MS Neg	2069	3790	227.071	501-36-0	445154	392875	C03582	HMDB03747
800	ribitol	Carbohydrate	Pentose Metabolism	15772	LC/MS Polar	100000406	1789.6	151.061	488-81-3	6912	10254628	C00474	HMDB00508
2517	riboflavin (Vitamin B2)	Cofactors and Vitamins	Riboflavin Metabolism	1827	LC/MS Pos	500	3098.3	377.146	83-88-5	493570	431981	C00255	HMDB00244
801	ribonate	Carbohydrate	Pentose Metabolism	27731	LC/MS Polar	100001007	2425	165.04	5336-08-03	5460677	4574162	C01685	HMDB00867
797	ribulose	Carbohydrate	Pentose Metabolism	35855	GC/MS	100000147	1662	306.1	488-84-6	151261	71354	C00309	HMDB00621
3247	rosuvastatin	Xenobiotics	Drug	40421	LC/MS Neg	100003272	4500	480.161	147098-20-2	446157	393589	D01915	HMDB15230
3384	S-(3-hydroxypropyl)mercapturic acid (HPMA)	Xenobiotics	Chemical	44552	LC/MS Neg	100004568	1576	220.065	23127-40-4	3371179	2616726
295	S-adenosylhomocysteine (SAH)	Amino Acid	Methionine, Cysteine, SAM and Taurine Metabolism	42382	LC/MS Pos	197	1495.9	193.068	979-92-0	439155	16788012	C00021	HMDB00939
294	S-adenosylmethionine (SAM)	Amino Acid	Methionine, Cysteine, SAM and Taurine Metabolism	15915	LC/MS Pos	1263	670	399.145	24346-00-7;86867-01-8;86867-0108	34755		C00019	HMDB01185
307	S-methylcysteine	Amino Acid	Methionine, Cysteine, SAM and Taurine Metabolism	39592	LC/MS Pos	100002749	848	119.016	1187-84-4	24417	22826		HMDB02108
2954	saccharin	Xenobiotics	Food Component/Plant	21151	LC/MS Neg	100000870	1999.7	181.992	81-07-2	5143	4959	D01085	HMDB29723
3249	salicylate	Xenobiotics	Drug	1515	LC/MS Neg	501	2195	137.024	69-72-7	338	331	C00805	HMDB01895
3079	salicyluric glucuronide*	Xenobiotics	Drug	33384	LC/MS Neg	100001332	1463	370.078			21403117
4	sarcosine (N-Methylglycine)	Amino Acid	Glycine, Serine and Threonine Metabolism	1516	GC/MS	1023	1182.9	116	107-97-1	1088	1057	C00213	HMDB00271
1359	scyllo-inositol	Lipid	Inositol Metabolism	32379	GC/MS	100001215	1893.8	318.2	488-59-5	892	10254646	C06153	HMDB06088
1111	sebacate (decanedioate)	Lipid	Fatty Acid, Dicarboxylate	32398	LC/MS Neg	100001211	1788	201.113	111-20-6	5192	5004	C08277	HMDB00792
9	serine	Amino Acid	Glycine, Serine and Threonine Metabolism	1648	LC/MS Pos	503	676.7	106.05	56-45-1	5951	5736	C00065	HMDB00187
217	serotonin (5HT)	Amino Acid	Tryptophan Metabolism	2342	LC/MS Pos	504	1654	177.102	153-98-0	5202	5013	C00780	HMDB00259
871	sorbitol	Carbohydrate	Fructose, Mannose and Galactose Metabolism	15053	GC/MS	506	1843	319.1	6706-59-8	5780	96680	C00794	HMDB00247
2971	stachydrine	Xenobiotics	Food Component/Plant	34384	LC/MS Pos	100001296	838.7	144.102	4136-37-2	115244	103115	C10172	HMDB04827
1107	suberate (octanedioate)	Lipid	Fatty Acid, Dicarboxylate	15730	LC/MS Pos	100000016	3608.1	175.096	505-48-6	10457	10025	C08278	HMDB00893
954	succinate	Energy	TCA Cycle	1437	GC/MS	252	1348	247	110-15-6	1110	1078	C00042	HMDB00254
3435	succinimide	Xenobiotics	Chemical	41888	LC/MS Neg	100003696	1270	98.0247	123-56-8	11439	10955	C07273
953	succinylcarnitine	Energy	TCA Cycle	37058	LC/MS Pos	100001948	1419	262.129
2723	sucralose	Xenobiotics	Food Component/Plant	36649	LC/MS Neg	100001789	3140	395.007	56038-13-2	71485		C12285	HMDB31554
854	sucrose	Carbohydrate	Disaccharides and Oligosaccharides	1519	LC/MS Neg	935	865	341.109	57-50-1	5988	5768	C00089	HMDB00258
3336	sulfate*	Xenobiotics	Chemical	46960	LC/MS Neg	100002528	616	96.9601	14808-79-8	1118	1086	C00059	HMDB01448
2972	sulforaphane	Xenobiotics	Food Component/Plant	38697	LC/MS Pos	100002816	3318	178.035	4478-93-7	5350	5157		HMDB05792
2696	sulforaphane-cysteine	Xenobiotics	Food Component/Plant	40451	LC/MS Pos	100003718	2012	299.055			21896884
2697	sulforaphane-N-acetyl-cysteine	Xenobiotics	Food Component/Plant	40468	LC/MS Neg	100003719	2230	339.051			21896881
2975	syringic acid	Xenobiotics	Food Component/Plant	37091	LC/MS Neg	100001919	1450	197.046	530-57-4	10742	10289	C10833	HMDB02085
3038	syringol sulfate	Xenobiotics	Food Component/Plant	48454	LC/MS Neg	100006256	2395	233.013	52904-67-3
2976	tartarate	Xenobiotics	Food Component/Plant	15336	LC/MS Neg	100000295	615.3	149.009	87-69-4;6106-24-7	444305	852	C00898	HMDB00956
314	taurine	Amino Acid	Methionine, Cysteine, SAM and Taurine Metabolism	2125	LC/MS Neg	512	690	124.007	107-35-7	1123	1091	C00245	HMDB00251
1777	tauro-beta-muricholate	Lipid	Primary Bile Acid Metabolism	33983	LC/MS Neg	100001250	4774	514.284	25696-60-0	168408	147312		HMDB00932
1770	taurocholate	Lipid	Primary Bile Acid Metabolism	18497	LC/MS Neg	1648	5150	514.284	145-42-6	6675		C05122	HMDB00036
1809	taurocholenate sulfate	Lipid	Secondary Bile Acid Metabolism	32807	LC/MS Neg	100001990	4750	279.614
1802	taurohyodeoxycholic acid	Lipid	Secondary Bile Acid Metabolism	43588	LC/MS Neg	100003869	5073	498.289	38411-85-7	119046	106373
1788	taurolithocholate 3-sulfate	Lipid	Secondary Bile Acid Metabolism	36850	LC/MS Neg	100001658	5026.7	280.622	64936-83-0	440071	389078	C03642	HMDB02580
1747	testosterone sulfate	Lipid	Steroid	35668	LC/MS Neg	100001548	4600	367.158	651-45-6	119207	19979647	C00535	HMDB02833
1691	tetrahydrocortisone	Lipid	Steroid	38608	LC/MS Neg	100002403	5121	363.218	53-05-4	5866	16735652	C05470	HMDB00903
2661	theobromine	Xenobiotics	Xanthine Metabolism	18392	LC/MS Pos	100000445	2151	181.072	83-67-0	5429	5236	C07480	HMDB02825
2662	theophylline	Xenobiotics	Xanthine Metabolism	18394	LC/MS Neg	100000437	2356.9	179.057	58-55-9	2153	2068	C07130	HMDB01889
810	threitol	Carbohydrate	Pentose Metabolism	35854	GC/MS	100001419	1513	217.1	2418-52-2	169019	147828	C16884	HMDB04136
2530	threonate	Cofactors and Vitamins	Ascorbate and Aldarate Metabolism	27738	LC/MS Polar	100001022	2384	135.03	70753-61-6	151152	133224	C01620	HMDB00943
14	threonine	Amino Acid	Glycine, Serine and Threonine Metabolism	1284	LC/MS Pos	564	701.5	120.066	72-19-5	6288	6051	C00188	HMDB00167
2486	thymine	Nucleotide	Pyrimidine Metabolism, Thymine containing	604	LC/MS Neg	882	1654	125.036	65-71-4	1135	1103	C00178	HMDB00262
2979	thymol sulfate	Xenobiotics	Food Component/Plant	36095	LC/MS Neg	100001757	4410	229.054	89-83-8		10709958	C09908	HMDB01878
271	tigloylglycine	Amino Acid	Leucine, Isoleucine and Valine Metabolism	1598	LC/MS Pos	1161	2518	158.081	35842-45-6	6441567	4945715		HMDB00959
270	tiglyl carnitine	Amino Acid	Leucine, Isoleucine and Valine Metabolism	35428	LC/MS Pos	100001597	2354	244.154	64191-86-2	22833596	17216200		HMDB02366
342	trans-4-hydroxyproline	Amino Acid	Urea cycle; Arginine and Proline Metabolism	32306	LC/MS Pos	1001	685	132.066	51-35-4	5810	5605	C01157	HMDB00725
59	trans-urocanate	Amino Acid	Histidine Metabolism	607	LC/MS Pos	537	1125.4	139.05	104-98-3	736715	643824	C00785	HMDB00301
3437	triethanolamine	Xenobiotics	Chemical	22202	LC/MS Pos	100000989	663.9	150.112	102-71-6	7618	13835630	C06771	HMDB32538
2512	trigonelline (N'-methylnicotinate)	Cofactors and Vitamins	Nicotinate and Nicotinamide Metabolism	32401	LC/MS Pos	100001092	771.8	138.055	535-83-1	5570	5369	C01004	HMDB00875
2985	trihydroxybutane	Xenobiotics	Food Component/Plant	38636	LC/MS Neg	100002193	925	105.056	4435-50-1	20497	19304
1393	trimethylamine N-oxide	Lipid	Phospholipid Metabolism	40406	LC/MS Pos	100003397	718	151.144	1184-78-7	1145	1113	C01104	HMDB00925
194	tryptamine	Amino Acid	Tryptophan Metabolism	6104	LC/MS Pos	1095	2395	161.107	61-54-1	1150	1118	C00398	HMDB00303
3010	tryptanthrin	Xenobiotics	Food Component/Plant	43578	LC/MS Pos	100004558	4769	249.066	13220-57-0	73549	66232	C10742
191	tryptophan	Amino Acid	Tryptophan Metabolism	54	LC/MS Pos	565	2440	205.097	73-22-3	6305	6066	C00078	HMDB00929
225	tryptophan betaine	Amino Acid	Tryptophan Metabolism	37097	LC/MS Pos	100001743	2466	247.144	20671-76-5	442106	390633	C09213	HMDB61115
116	tyramine	Amino Acid	Phenylalanine and Tyrosine Metabolism	1603	LC/MS Pos	1133	1511.9	138.091	60-19-5	5610	5408	C00483	HMDB00306
185	tyramine O-sulfate	Amino Acid	Phenylalanine and Tyrosine Metabolism	48408	LC/MS Neg	100006092	1565	216.034	30223-92-8	153005	134849		HMDB06409
110	tyrosine	Amino Acid	Phenylalanine and Tyrosine Metabolism	1299	LC/MS Pos	815	1516.3	182.081	60-18-4	6057	5833	C00082	HMDB00158
3022	umbelliferone sulfate	Xenobiotics	Food Component/Plant	48674	LC/MS Neg	100006282	2442.8	240.981	69526-88-1	129659	114800
2445	uracil	Nucleotide	Pyrimidine Metabolism, Uracil containing	605	LC/MS Pos	825	1152.2	113.035	66-22-8	1174	1141	C00106	HMDB00300
2366	urate	Nucleotide	Purine Metabolism, (Hypo)Xanthine/Inosine containing	1604	LC/MS Neg	1134	757.1	167.021	69-93-2;120K5305	1175		C00366	HMDB00289
322	urea	Amino Acid	Urea cycle; Arginine and Proline Metabolism	1670	LC/MS Pos	533	739	121.072	57-13-6	1176	1143	C00086	HMDB00294
2444	uridine	Nucleotide	Pyrimidine Metabolism, Uracil containing	606	LC/MS Neg	535	1457.6	243.062	58-96-8	6029	5807	C00299	HMDB00296
2440	uridine monophosphate (5' or 3')	Nucleotide	Pyrimidine Metabolism, Uracil containing	39892	LC/MS Pos	100003366	1100	325.043	58-97-9	6030			HMDB00288
1186	valerylglycine	Lipid	Fatty Acid Metabolism(Acyl Glycine)	36768	LC/MS Pos	100001451	2814	160.097	24003-66-5	4737557	3924818		HMDB00927
276	valine	Amino Acid	Leucine, Isoleucine and Valine Metabolism	1649	LC/MS Pos	566	1042.1	118.086	72-18-4	6287	6050	C00183	HMDB00883
704	valylleucine	Peptide	Dipeptide	39994	LC/MS Pos	100003210	2562	231.17	22906-55-4	352039	312586
2761	vanillate	Xenobiotics	Food Component/Plant	35639	LC/MS Neg	100001634	1100	167.035	121-34-6	8468	8155	C06672	HMDB00484
187	vanillic alcohol sulfate	Amino Acid	Phenylalanine and Tyrosine Metabolism	48733	LC/MS Neg	100006125	1808	233.013	754920-02-0
138	vanillylmandelate (VMA)	Amino Acid	Phenylalanine and Tyrosine Metabolism	1567	LC/MS Neg	1111	941	197.046	55-10-7	1245	1207	C05584	HMDB00291
3267	venlafaxine	Xenobiotics	Drug	38623	LC/MS Pos	100002807	3677	278.211	93413-69-5	5656	5454	C07187	HMDB05016
2359	xanthine	Nucleotide	Purine Metabolism, (Hypo)Xanthine/Inosine containing	3147	LC/MS Pos	1004	1449.7	153.041	69-89-6	1188	1151	C00385	HMDB00292
2361	xanthosine	Nucleotide	Purine Metabolism, (Hypo)Xanthine/Inosine containing	15136	LC/MS Pos	100000299	1827	285.083	146-80-5	64959	58484	C01762	HMDB00299
208	xanthurenate	Amino Acid	Tryptophan Metabolism	15679	LC/MS Pos	100000015	2655.6	206.045	59-007	5699	5497	C02470	HMDB00881
806	xylitol	Carbohydrate	Pentose Metabolism	4966	GC/MS	543	1677.6	307.2	87-99-0	6912	6646	C00379	HMDB02917
804	xylonate	Carbohydrate	Pentose Metabolism	35638	GC/MS	100001627	1722	292	73686-31-7	6602431	5034782	C05411	HMDB60256
805	xylose	Carbohydrate	Pentose Metabolism	15581	LC/MS Polar	826	1727	195.051	609-06-3	135191	85957	C00181	HMDB00098
802	xylulose	Carbohydrate	Pentose Metabolism	18344	GC/MS	100000421	1668	306.1	551-84-8	5289590	4451524	C00310	HMDB00654
* indicates compounds that have not been officially confirmed based on a standard but we are confident in its identity

## Sheet: Supplementary_table_S5
Supplementary Table S5: Metabolite Names to Venn Diagram Figure 1 (All detected metabolites in the four different matrices)
List names	number of elements	number of unique elements		Names	total	elements
Adipose tissue	282	282		Adipose tissue, Muscle tissue, Plasma, Urine	88	glycine arginine 3-methyl-2-oxobutyrate tryptophan 2-hydroxyglutarate erythronate* pantothenate leucine N-acetylmethionine dehydroisoandrosterone sulfate (DHEA-S) pyroglutamine* uridine p-cresol sulfate valine pseudouridine phosphate tyrosine 3-(4-hydroxyphenyl)lactate isovalerylcarnitine ornithine glucose lysine 5-oxoproline trans-urocanate myo-inositol 4-acetaminophen sulfate carnitine glutamat…
Muscle tissue	446	446		Adipose tissue, Muscle tissue, Plasma	51	margarate (17:0) 1-stearoylglycerophosphoinositol eicosapentaenoate (EPA; 20:5n3) 1-linoleoylglycerophosphocholine (18:2n6) docosapentaenoate (n3 DPA; 22:5n3) 1-arachidonoylglycerophosphoethanolamine* docosahexaenoate (DHA; 22:6n3) dihomo-linoleate (20:2n6) 1-linoleoylglycerophosphoethanolamine* arachidonate (20:4n6) 1-arachidonoylglycerophosphoinositol* erucate (22:1n9) piperine heme mead acid (…
Plasma	405	405		Adipose tissue, Plasma, Urine	3	cysteine venlafaxine salicyluric glucuronide*
Urine	604	604		Muscle tissue, Plasma, Urine	80	gamma-glutamylisoleucine* 2-aminoheptanoate urea glycodeoxycholate pipecolate betaine 7-methylguanine 7-methylxanthine glycocholenate sulfate* alpha-hydroxyisocaproate 2-methoxyacetaminophen sulfate* N-acetylglycine quinine N-acetylthreonine 2-aminophenol sulfate glutarylcarnitine (C5) citrate N1-methyladenosine 2-aminooctanoate 2-hydroxy-3-methylvalerate gamma-glutamylleucine gamma-glutamylvalin…
Overall number of unique elements		923		Adipose tissue, Muscle tissue, Urine	38	4-hydroxybenzoate cytidine taurine adenosine 2-aminoadipate glutarate (pentanedioate) fumarate adenosine 3',5'-cyclic monophosphate (cAMP) N-methylproline valylleucine uridine monophosphate (5' or 3') N-ethylglycinexylidide phosphoethanolamine S-adenosylhomocysteine (SAH) N-acetylaspartate (NAA) aspartate N-acetylputrescine 4-acetamidophenylglucuronide N-acetylneuraminate 4-guanidinobutanoate 3-h…
				Adipose tissue, Plasma	11	nonadecanoate (19:0) 2-hydroxypalmitate pentadecanoate (15:0) gamma-tocopherol adrenate (22:4n6) 1-palmitoylglycerol (1-monopalmitin) 2-palmitoleoylglycerophosphocholine* 15-methylpalmitate (isobar with 2-methylpalmitate) palmitoleate (16:1n7) myristate (14:0) 3-hydroxydecanoate
				Muscle tissue, Plasma	17	gamma-glutamylalanine 1-palmitoylglycerophosphoglycerol* 3-phenylpropionate (hydrocinnamate) indolepropionate stearoyl sphingomyelin cis-4-decenoyl carnitine stearoylcarnitine N-palmitoyltaurine caproate (6:0) oleoylcarnitine 1-oleoylglycerol (1-monoolein) N-stearoyltaurine caprylate (8:0) 2-ethylhexanoate N-oleoyltaurine heptanoate (7:0) 7-alpha-hydroxy-3-oxo-4-cholestenoate (7-Hoca)
				Plasma, Urine	55	2-hydroxyisobutyrate 2-piperidinone 4-ethylphenylsulfate arabinose 5-acetylamino-6-formylamino-3-methyluracil 1,3,7-trimethylurate xylonate ethyl glucuronide 5-acetylamino-6-amino-3-methyluracil cotinine 2-hydroxyibuprofen cholate 3-hydroxyquinine serotonin (5HT) N-acetyl-3-methylhistidine* gamma-glutamyltyrosine 4-hydroxyphenylacetate 1,6-anhydroglucose thymol sulfate pregn steroid monosulfate* …
				Adipose tissue, Muscle tissue	51	nicotinamide adenine dinucleotide (NAD+) hypotaurine inositol 1-phosphate (I1P) glutathione, oxidized (GSSG) ophthalmate 4-hydroxy-nonenal-glutathione palmitoyl-arachidonoyl-glycerophosphocholine (2)* phosphoenolpyruvate (PEP) stearoyl ethanolamide uridine 5'-diphosphate (UDP) oleoyl-linoleoyl-glycerophosphocholine (2)* Isobar: fructose 1,6-diphosphate, glucose 1,6-diphosphate, myo-inositol 1,4 o…
				Adipose tissue, Urine	11	O-desmethylvenlafaxine glucuronate 3-hydroxysebacate uracil 3-hydroxy-3-methylglutarate suberate (octanedioate) phenylalanylglycine sucrose cysteine-glutathione disulfide 1-methylimidazoleacetate 1-methylnicotinamide
				Muscle tissue Urine	61	ethanolamine 4-acetamidobutanoate N-methylpipecolate homocarnosine N2,N2-dimethylguanosine methionine sulfone anserine N-acetyl-aspartyl-glutamate (NAAG) tiglyl carnitine orotidine 3-(N-acetyl-L-cystein-S-yl) acetaminophen imidazole lactate 1,2,3-benzenetriol sulfate (2) N-acetyltaurine N6-succinyladenosine arabonate galactitol (dulcitol) N2-acetyllysine 5-methylthioadenosine (MTA) imidazole prop…
				Plasma	100	ADSGEGDFXAEGGGVR* bradykinin 1-dihomo-linoleoylglycerophosphocholine (20:2n6)* 4-androsten-3beta,17beta-diol disulfate 2* bilirubin (Z,Z) dodecanedioate 3-dehydrocarnitine* resveretrol sulfate 1 1-eicosapentaenoylglycerophosphocholine (20:5n3)* andro steroid monosulfate 2* caprate (10:0) 2-docosahexaenoylglycerophosphocholine* 13-HODE + 9-HODE 2-docosahexaenoylglycerophosphoethanolamine* 1-eicosa…
				Adipose tissue	29	phenylalanylalanine N-acetylglucosamine 6-phosphate 1-methylhistamine sedoheptulose-7-phosphate valylglycine oleoyl sphingomyelin behenoyl sphingomyelin* N-formylphenylalanine cysteine sulfinic acid stearoyl-arachidonoyl-glycerophosphocholine (1)* sphingosine guanosine 5'-diphospho-fucose palmitoyl-palmitoyl-glycerophosphocholine (1)* nicotinamide ribonucleotide (NMN) tartronate (hydroxymalonate)…
				Muscle tissue	60	1-palmitoylglycerophosphate adenosine 3',5'-diphosphate flavin mononucleotide (FMN) stearoyl-linoleoyl-glycerophosphocholine (1)* 3-hydroxypyridine palmitoyl-oleoyl-glycerophosphoglycerol (1)* UDP-galactose cytidine 5'-monophospho-N-acetylneuraminic acid mannose-6-phosphate glycerophosphoinositol* fructose-6-phosphate ribose 1-phosphate cytidine triphosphate cytidine-5'-diphosphoethanolamine cyti…
				Urine	268	5-hydroxyhexanoate glycerophosphoglycerol cystathionine mandelate N-acetylcysteine equol glucuronide triethanolamine 3-methylglutaconate N-acetyl-cadaverine pentaethylene glycol cryptochlorogenic acid isocitrate guanosine-3',5'-cyclic monophosphate (cGMP) aconitate [cis or trans] levulinate (4-oxovalerate) nicotine neopterin mesaconate (methylfumarate) trimethylamine N-oxide chiro-inositol N2,N6-…

## Sheet: Supplementary_table_S6
Supplementary Table S6: Metabolite Names to Venn Diagram Figure 2 (Significantly hRSV-altered metabolites detected in the four different matrices)
List names	number of elements	number of unique elements		Names	total	elements
Adipose tissue	45	45		Adipose tissue, Muscle tissue, Plasma, Urine	1	dehydroisoandrosterone sulfate (DHEA-S)
Muscle tissue	24	24		Muscle tissue, Plasma, Urine	1	epiandrosterone sulfate
Plasma	38	38		Adipose tissue, Plasma	1	N-acetylmethionine
Urine	43	43		Muscle tissue, Plasma	1	androsterone sulfate
Overall number of unique elements		133		Plasma, Urine	3	pregn steroid monosulfate* 5alpha-androstan-3beta,17alpha-diol disulfate 21-hydroxypregnenolone disulfate
				Adipose tissue, Muscle tissue	3	4-androsten-3beta,17beta-diol disulfate (1) stearidonate (18:4n3) 1-palmitoylglycerophosphoethanolamine
				Adipose tissue, Urine	4	uridine hypoxanthine guanine indolelactate
				Plasma	31	4-androsten-3beta,17beta-diol disulfate 2* maltotriose pregnenolone sulfate 5-methyluridine (ribothymidine) pseudouridine 1-palmitoylglycerophosphoinositol* dodecanedioate resveretrol sulfate 1 glycolate (hydroxyacetate) iminodiacetate (IDA) pregnen-diol disulfate* andro steroid monosulfate 2* 2-myristoylglycerophosphocholine* 5alpha-pregnan-3beta,20alpha-diol disulfate glycocholenate sulfate* 10…
				Adipose tissue	36	S-adenosylhomocysteine (SAH) 4-guanidinobutanoate docosapentaenoate (n3 DPA; 22:5n3) creatine phosphate phenylpyruvate isoleucine docosahexaenoate (DHA; 22:6n3) dimethylarginine (SDMA + ADMA) inosine 4-hydroxy-nonenal-glutathione linoleate (18:2n6) 1-linoleoylglycerophosphoethanolamine* palmitoleate (16:1n7) 1-arachidonoylglycerophosphoinositol* lysine 5-oxoproline cytidine mead acid (20:3n9) phe…
				Muscle tissue	18	10-heptadecenoate (17:1n7) N-stearoyltaurine N2-acetyllysine erythritol malate glycerophosphorylcholine (GPC) N-acetylglutamate stearoyl ethanolamide undecanoate (11:0) 2-aminophenol sulfate valerate valerylglycine arachidate (20:0) stearoyl-arachidonoyl-glycerophosphoinositol (1)* heptanoate (7:0) nicotinate 1-stearoylplasmenylethanolamine* 2-hydroxy-3-methylvalerate
				Urine	34	tyramine N-acetyl-3-methylhistidine* testosterone sulfate homovanillate (HVA) resveratrol 2-piperidinone N-methyltaurine levulinate (4-oxovalerate) theobromine 4-hydroxyphenylpyruvate 4-androsten-3alpha,17alpha-diol monosulfate (2) scyllo-inositol cysteine s-sulfate imidazole propionate tryptamine 4-androsten-3beta,17beta-diol monosulfate (2) taurine 1,3,7-trimethylurate 3-methylglutarylcarnitine…

## Sheet: Supplementary_table_S7
Supplementary Table S7: Random Forest Classification Plots Plasma, Adipose Tissue, Muscle Tissue, Urine
